# Supplementary material for: An efficient synthesis of triazolo-carbohydrate mimetics and their conformational analysis
Source: Royal Society of Chemistry journal article supplement (doi:10.1039/b803924k), 2008-01-01
Supplement: b803924k.pdf [file b803924k.pdf]

# An Efficient Synthesis of Triazolo-carbohydrate Mimetics and Their Conformation Analysis

Hikaru Yanai, Shun Obara and Takeo Taguchi\*

*School of Pharmacy, Tokyo University of Pharmacy and Life Sciences, 1423-1 Horinouchi, Hachioji, Tokyo 192-0392, Japan*

E-mail: taguchi@ps.toyaku.ac.jp

## Supporting Information

### Table of contents

|                                                                                                                  |        |
|------------------------------------------------------------------------------------------------------------------|--------|
| 1. Preparation of triazolo-mannose mimic <b>6b</b>                                                               | p. S2  |
| 2. Preparation of triazolo-galactose mimic <b>6c</b>                                                             | p. S3  |
| 3. Preparation of triazolo-gulose mimic <i>ent-5b</i>                                                            | p. S5  |
| 4. Preparation of triazolo-altrose mimic <i>ent-5c</i>                                                           | p. S7  |
| 5. <sup>1</sup> H and <sup>13</sup> C NMR spectra of <b>2a</b> , <b>3a</b> , <b>4a</b> , <b>5a</b> and <b>6a</b> | p. S9  |
| 6. <sup>1</sup> H and <sup>13</sup> C NMR spectra of <b>7a</b> , <b>8a</b> and <b>9a</b>                         | p. S16 |
| 7. <sup>1</sup> H and <sup>13</sup> C NMR spectra of <b>2b</b> , <b>3b</b> , <b>4b</b> , <b>5b</b> and <b>6b</b> | p. S20 |
| 8. <sup>1</sup> H and <sup>13</sup> C NMR spectra of <b>2c</b> , <b>3c</b> , <b>4c</b> , <b>5c</b> and <b>6c</b> | p. S27 |
| 9. <sup>1</sup> H and <sup>13</sup> C NMR spectra of <b>7c</b> , <b>8c</b> and <b>9c</b>                         | p. S34 |
| 10. <sup>1</sup> H and <sup>13</sup> C NMR spectra of <b>7b</b> , <b>8b</b> and <b>9b</b>                        | p. S38 |
| References                                                                                                       | p. S42 |

## 1. Preparation of triazolo-mannose mimic **6b**

**(2S,3S,4R)-2,3,4-Tri(benzyloxy)-1,1-dimethoxyhex-5-ene (2b).** According to the synthetic procedure for **2a**, 1,1-dimethoxyhex-5-ene derivative **2b** was prepared in 100% yield (6.29 g, 13.6 mmol) by the reaction of (2S,3S,4R)-2,3,4-tribenzyloxyhex-5-enal **1b** (5.7 g, 13.6 mmol),<sup>1</sup> *p*TsOH·H<sub>2</sub>O (30 mg) and HC(OMe)<sub>3</sub> (35 mL). Colorless oil.  $[\alpha]_D^{25}$  (*c* 1.00, CHCl<sub>3</sub>) -23.7; IR (neat)  $\nu$  3030, 2930, 1454, 1093, 735, 697 cm<sup>-1</sup>; <sup>1</sup>H NMR (400 MHz, CDCl<sub>3</sub>)  $\delta$  3.37 (3H, s), 3.40 (3H, s), 3.67-3.71 (1H, m), 3.72-3.75 (1H, m), 4.15 (1H, dd, *J* = 7.5, 5.6 Hz), 4.33 (1H, d, *J* = 11.8 Hz), 4.47 (1H, d, *J* = 11.5 Hz), 4.55 (1H, d, *J* = 4.7 Hz), 4.59 (1H, d, *J* = 11.8 Hz), 4.69 (1H, d, *J* = 11.5 Hz), 4.73 (1H, d, *J* = 11.5 Hz), 4.75 (1H, d, *J* = 11.5 Hz), 5.25 (1H, dd, *J* = 10.3, 1.5 Hz), 5.33 (1H, dd, *J* = 17.3, 1.5 Hz), 5.83 (1H, ddd, *J* = 17.3, 10.3, 7.5 Hz), 7.20-7.35 (15H, m); <sup>13</sup>C NMR (100 MHz, CDCl<sub>3</sub>)  $\delta$  55.2, 56.2, 70.6, 73.7, 74.7, 78.9, 81.0, 82.6, 105.4, 118.6, 127.4, 127.8, 127.8, 127.9, 128.1, 128.2, 128.2, 136.0, 138.6, 138.7, 138.9. MS (ESI-TOF) *m/z* 485 [M+Na]<sup>+</sup>. HRMS calcd for C<sub>29</sub>H<sub>34</sub>NaO<sub>5</sub> [M+Na]<sup>+</sup>, 485.2304; found, 485.2324. Anal. Calcd for C<sub>29</sub>H<sub>34</sub>O<sub>5</sub>: C, 75.30; H, 7.41. Found: C, 75.37; H, 7.47.

**(2S,3R,4S)-Tri(benzyloxy)-5,5-dimethoxypentanal (3b).** According to the synthetic procedure for **3a**, 5,5-dimethoxypentanal derivative **3b** was prepared in 86% yield (4.39 g, 9.46 mmol) by the reaction of **2b** (5.1 g, 11 mmol), OsO<sub>4</sub> (0.11 M in H<sub>2</sub>O, 4.5 mL, 0.5 mmol), NMO (3.8 g, 33 mmol) and NaIO<sub>4</sub> (5 g) in a mixture of acetone (200 mL), H<sub>2</sub>O (50 mL) and *tert*-butyl alcohol (6.5 mL). Colorless oil.  $[\alpha]_D^{25}$  (*c* 1.00, CHCl<sub>3</sub>) -31.3. IR (neat)  $\nu$  3030, 2930, 1730, 1454, 1093, 735, 697 cm<sup>-1</sup>. <sup>1</sup>H NMR (400 MHz, CDCl<sub>3</sub>)  $\delta$  3.37 (3H, s), 3.44 (3H, s), 3.77-3.82 (1H, m), 4.03-4.05 (1H, m), 4.09-4.13 (1H, m), 4.53 (1H, d, *J* = 11.9 Hz), 4.55-4.63 (4H, m), 4.69 (1H, d, *J* = 11.8 Hz), 4.81 (1H, d, *J* = 11.5 Hz), 7.25-7.36 (15H, m), 9.69 (1H, brs); <sup>13</sup>C NMR (100 MHz, CDCl<sub>3</sub>)  $\delta$  55.7, 55.8, 73.1, 73.2, 74.3, 79.1, 79.5, 83.0, 105.0, 127.5, 127.8, 127.8, 127.9, 128.0, 128.1, 128.2, 128.3, 128.4, 137.3, 137.7, 138.2, 201.1; MS (ESI-TOF) *m/z* 487 [M+Na]<sup>+</sup>; HRMS calcd for C<sub>28</sub>H<sub>32</sub>NaO<sub>6</sub> [M+Na]<sup>+</sup>, 487.2097; found, 487.2082.

**(2S,3S,4R)-2,3,4-Tri(benzyloxy)-1,1-dimethoxyhex-5-yne (4b).** According to the synthetic procedure for **4a**, 1,1-dimethoxyhex-5-yne derivative **4b** was prepared in 52% yield (1.23 g, 2.72 mmol) by the reaction of **3b** (2.3 g, 13.5 mmol), Ohira-Bestmann reagent (2.88 g, 15 mmol) and K<sub>2</sub>CO<sub>3</sub> (2.3 g, 13.5 mmol) in MeOH (400 mL). Colorless oil.  $[\alpha]_D^{25}$  (*c* 1.00, CHCl<sub>3</sub>) -50.3; IR (neat)  $\nu$  3030, 2931, 1454, 1070, 737, 697 cm<sup>-1</sup>. <sup>1</sup>H NMR (400 MHz, CDCl<sub>3</sub>)  $\delta$  2.55 (1H, d, *J* = 2.1 Hz), 3.39 (3H, s), 3.42 (3H, s), 3.87-3.89 (1H, m), 3.94 (1H, dd, *J* = 5.6, 4.9 Hz), 4.49-4.58 (3H, m), 4.63 (1H, d, *J* = 4.9 Hz), 4.76 (1H, d, *J* = 11.4 Hz), 4.79 (1H, d, *J* = 11.1 Hz), 4.87 (1H, d, *J* = 11.7 Hz), 4.98 (1H, d, *J* = 11.4 Hz), 7.25-7.42 (15H, m); <sup>13</sup>C NMR (100 MHz, CDCl<sub>3</sub>)  $\delta$  55.1, 56.1, 69.4, 70.9, 73.6, 74.8, 77.3, 78.7, 81.1, 81.6, 105.0, 127.4, 127.6, 127.9, 127.9, 128.1, 128.2, 128.3, 137.7, 138.4, 138.6; MS (ESI-TOF) *m/z* 483 [M+Na]<sup>+</sup>; HRMS calcd for C<sub>29</sub>H<sub>32</sub>NaO<sub>5</sub> [M+Na]<sup>+</sup>, 483.2147; found, 483.2135.

### **(4R,5S,6S,7R)-4,5,6-Tri(benzyloxy)-7-methoxy-4,5,6,7-tetrahydro[1,2,3]triazolo[1,5-*a*]pyridine (5b- $\alpha$ ) and (4R,5S,6S,7S)-4,5,6-tri(benzyloxy)-7-methoxy-4,5,6,7-tetrahydro[1,2,3]triazolo[1,5-*a*]pyridine (5b- $\beta$ ).**

According to the synthetic procedure for **5a**, these compounds were prepared in 91% yield (**5b- $\alpha$**  88.0 mg, 0.187 mmol, 43% yield; **5b- $\beta$**  98.2 mg, 0.208 mmol, 48% yield) by the reaction of **4b** (200 mg, 0.43 mmol) and TMSN<sub>3</sub> (260  $\mu$ L, 2.2 mmol) in the presence of In(OTf)<sub>3</sub> (12.5 mg, 22  $\mu$ mol) in 1,2-dichloroethane (6.0 mL). **5b- $\alpha$**  as a less polar isomer. Colorless oil.  $[\alpha]_D^{25}$  (*c* 1.05, CHCl<sub>3</sub>) -22.3; IR (neat,  $\nu$ ) 3031, 2933, 1496, 1454, 1198, 1093, 740, 698 cm<sup>-1</sup>; <sup>1</sup>H-NMR (400 MHz, CDCl<sub>3</sub>)  $\delta$  3.53 (3H, s), 4.22 (1H, dd, *J* = 3.4, 2.1 Hz), 4.26 (1H, dd, *J* = 7.7, 2.1 Hz), 4.64-4.75 (4H, m), 4.77 (1H, d, *J* = 11.5 Hz), 4.81 (1H, d, *J* = 11.5 Hz), 4.95 (1H, d, *J* = 7.7 Hz), 5.57 (1H, d, *J* = 3.4 Hz), 7.19-7.34 (15H, m), 7.53 (1H, s); <sup>13</sup>C NMR (100 MHz, CDCl<sub>3</sub>)  $\delta$  58.3, 71.4, 72.8, 73.2, 73.4, 76.0,

78.1, 86.4, 127.7, 127.8, 127.87, 127.94, 128.01, 128.03, 128.4, 128.47, 128.51, 132.1, 134.3, 137.2, 137.5, 137.7; MS (ESI-TOF)  $m/z$  472 [M+H]<sup>+</sup>; HRMS calcd for C<sub>28</sub>H<sub>30</sub>N<sub>3</sub>O<sub>4</sub> [M+Na]<sup>+</sup>, 472.2236; found, 472.2264. **5b-β** as a more polar isomer. Colorless oil.  $[\alpha]_D^{25}$  (*c* 1.03, CHCl<sub>3</sub>) -73.7; IR (neat)  $\nu$  3031, 2915, 1496, 1454, 1195, 1101, 740, 698 cm<sup>-1</sup>; <sup>1</sup>H NMR (400 MHz, CDCl<sub>3</sub>)  $\delta$  3.58 (3H, s), 4.23 (1H, dd, *J* = 3.4, 2.1 Hz), 4.28 (1H, dd, *J* = 7.5, 2.1 Hz), 4.64-4.75 (4H, m), 4.78 (1H, d, *J* = 12.0 Hz), 4.79 (1H, d, *J* = 12.0 Hz), 4.96 (1H, d, *J* = 7.5 Hz), 5.58 (1H, d, *J* = 3.4 Hz), 7.26-7.41 (15H, m), 7.57 (1H, s); <sup>13</sup>C NMR (100 MHz, CDCl<sub>3</sub>)  $\delta$  58.4, 71.5, 72.9, 73.3, 73.4, 76.1, 78.1, 86.5, 127.8, 127.8, 127.9, 128.0, 128.1, 128.5, 128.5, 128.6, 132.2, 134.3, 137.2, 137.6, 137.7; MS (ESI-TOF)  $m/z$  472 [M+H]<sup>+</sup>; HRMS calcd for C<sub>28</sub>H<sub>30</sub>N<sub>3</sub>O<sub>4</sub> [M+H]<sup>+</sup>, 472.2236; found, 472.2277.

**(4R,5S,6S,7R)-4,5,6-Trihydroxy-7-methoxy-4,5,6,7-tetrahydro[1,2,3]triazolo[1,5-*a*]pyridine (6b-α).** According to the synthetic procedure for **6a-α**, triol **6b-α** was obtained in 88% yield (76.1 mg, 0.379 mmol) by the debenzoylation reaction of **5b-α** (200 mg, 0.43 mmol) in the presence of Pd(OH)<sub>2</sub> on carbon (20 w/w%, 238 mg) in MeOH (5.0 mL) under H<sub>2</sub> atmosphere (1 atm). Colorless oil.  $[\alpha]_D^{25}$  (*c* 1.02, MeOH) +28.9; IR (neat)  $\nu$  3335, 2928, 1457, 1273, 1126, 1071 cm<sup>-1</sup>; <sup>1</sup>H NMR (400 MHz, D<sub>2</sub>O)  $\delta$  3.64 (3H, s), 4.25 (1H, dd, *J* = 8.0, 2.2 Hz), 4.50 (1H, dd, *J* = 3.2, 2.2 Hz), 4.99 (1H, d, *J* = 8.0 Hz), 5.77 (1H, d, *J* = 3.2 Hz), 7.92 (1H, s); <sup>13</sup>C NMR (100 MHz, CDCl<sub>3</sub>)  $\delta$  60.1, 66.5, 72.5, 73.1, 90.6, 134.5, 138.7; MS (ESI-TOF)  $m/z$  202 [M+H]<sup>+</sup>; HRMS calcd for C<sub>28</sub>H<sub>30</sub>N<sub>3</sub>O<sub>4</sub> [M+H]<sup>+</sup>, 202.0828; found, 202.0818.

**(4R,5S,6S,7S)-4,5,6-Trihydroxy-7-methoxy-4,5,6,7-tetrahydro[1,2,3]triazolo[1,5-*a*]pyridine (6b-β).** According to the synthetic procedure for **6a-α**, triol **6b-β** was obtained in 79% yield (60.5 mg, 0.305 mmol) by the debenzoylation reaction of **5b-β** (180 mg, 0.39 mmol) in the presence of Pd(OH)<sub>2</sub> on carbon (20 w/w%, 218 mg) in MeOH (5.0 mL) under H<sub>2</sub> atmosphere (1 atm). Colorless oil.  $[\alpha]_D^{25}$  (*c* 1.01, MeOH) -86.6; IR (neat)  $\nu$  3348, 2927, 1455, 1226, 1114, 1084 cm<sup>-1</sup>; <sup>1</sup>H NMR (400 MHz, D<sub>2</sub>O)  $\delta$  3.88 (3H, s), 4.04 (1H, dd, *J* = 7.4, 2.3 Hz), 4.59 (1H, dd, *J* = 3.3, 2.3 Hz), 5.05 (1H, d, *J* = 7.4 Hz), 5.80 (1H, d, *J* = 3.3 Hz), 7.89 (1H, s); <sup>13</sup>C NMR (100 MHz, D<sub>2</sub>O)  $\delta$  61.5, 66.1, 70.9, 74.2, 89.9, 133.9, 138.0; MS (ESI-TOF)  $m/z$  202 [M+H]<sup>+</sup>; HRMS calcd for C<sub>7</sub>H<sub>12</sub>N<sub>3</sub>O<sub>4</sub> [M+H]<sup>+</sup>, 202.0828; found, 202.0813.

## 2. Preparation of triazolo-galactose mimic 6c

**(2R,3S,4S)-2,3,4-Tri(benzyloxy)-1,1-dimethoxyhex-5-ene (2c).** According to the synthetic procedure for **2a**, 1,1-dimethoxyhex-5-ene derivative **2c** was prepared in 91% (1.26 g, 2.72 mmol) by the reaction of (2R,3S,4S)-2,3,4-tribenzyloxyhex-5-enal **1c** (1.3 g, 3.0 mmol),<sup>2</sup> *p*TsOH-H<sub>2</sub>O (43 mg) and HC(OMe)<sub>3</sub> (7 mL). Colorless oil.  $[\alpha]_D^{25}$  (*c* 1.00, CHCl<sub>3</sub>) +18.1; IR (neat)  $\nu$  3030, 2928, 1454, 1094, 734, 697 cm<sup>-1</sup>; <sup>1</sup>H NMR (400 MHz, CDCl<sub>3</sub>)  $\delta$  3.27 (3H, s), 3.43 (3H, s), 3.73 (1H, dd, *J* = 7.7, 2.6 Hz), 3.80 (1H, dd, *J* = 7.1, 2.6 Hz), 4.09 (1H, t, *J* = 7.7 Hz), 4.12 (1H, d, *J* = 11.5 Hz), 4.47-4.56 (4H, m), 4.69 (1H, d, *J* = 11.3 Hz), 4.78 (1H, d, *J* = 11.5 Hz), 5.34 (1H, brd, *J* = 10.2 Hz), 5.41 (1H, brd, *J* = 17.5 Hz), 5.90 (1H, ddd, *J* = 17.5, 10.2, 7.7 Hz), 7.17-7.34 (15H, m); <sup>13</sup>C NMR (100 MHz, CDCl<sub>3</sub>)  $\delta$  53.9, 56.2, 69.9, 74.3, 74.4, 78.7, 79.8, 81.0, 105.6, 119.3, 127.3, 127.4, 127.5, 127.9, 128.0, 128.1, 128.2, 136.5, 138.5, 138.6, 138.9; MS (ESI-TOF)  $m/z$  485 [M+Na]<sup>+</sup>; HRMS calcd for C<sub>29</sub>H<sub>34</sub>NaO<sub>5</sub> [M+Na]<sup>+</sup>, 485.2304; found, 485.2286.

**(2R,3S,4R)-Tri(benzyloxy)-5,5-dimethoxypentanal (3c).** According to the synthetic procedure for **3a**, 5,5-dimethoxypentanal derivative **3c** was prepared in 89% yield (1.03 g, 2.22 mmol) by the reaction of **2c** (1.2 g, 2.5 mmol), OsO<sub>4</sub> (0.11 M in H<sub>2</sub>O, 1.2 mL,

0.13 mmol), NMO (0.5 g, 4.5 mmol) and NaIO<sub>4</sub> (3 g) in a mixture of acetone (40 mL), H<sub>2</sub>O (10 mL) and *tert*-butyl alcohol (3 mL). Colorless oil.  $[\alpha]_{\text{D}}^{25}$  (*c* 1.00, CHCl<sub>3</sub>) +9.10; IR (neat)  $\nu$  3031, 2932, 1733, 1454, 1092, 737, 698 cm<sup>-1</sup>. <sup>1</sup>H NMR (400 MHz, CDCl<sub>3</sub>)  $\delta$  3.28 (3H, s), 3.42 (3H, s), 3.66 (1H, dd, *J* = 6.3, 3.3 Hz), 3.98-4.02 (2H, m), 4.27 (1H, d, *J* = 11.7 Hz), 4.45 (1H, d, *J* = 6.3 Hz), 4.51 (1H, d, *J* = 11.4 Hz), 4.55 (1H, d, *J* = 11.3 Hz), 4.57 (1H, d, *J* = 11.7 Hz), 4.63 (1H, d, *J* = 11.3 Hz), 4.77 (1H, d, *J* = 11.4 Hz), 7.19-7.30 (15H, m), 9.64 (1H, d, *J* = 1.4 Hz); <sup>13</sup>C NMR (100 MHz, CDCl<sub>3</sub>)  $\delta$  54.7, 56.3, 72.3, 74.1, 74.3, 78.8, 79.6, 83.6, 105.5, 127.7, 127.7, 127.8, 128.2, 128.2, 128.3, 137.3, 137.8, 138.1, 201.2; MS (ESI-TOF) *m/z* 487 [M+Na]<sup>+</sup>; HRMS calcd for C<sub>28</sub>H<sub>32</sub>NaO<sub>6</sub> [M+Na]<sup>+</sup>, 487.2097; found: 487.2077.

**(2*R*,3*S*,4*S*)-2,3,4-Tri(benzyloxy)-1,1-dimethoxyhex-5-yne (4c).** According to the synthetic procedure for **4a**, 1,1-dimethoxyhex-5-yne derivative **4c** was prepared in 68% yield (0.69 g, 1.50 mmol) by the reaction of **3c** (1.0 g, 2.2 mmol), Ohira-Bestmann reagent (3.6 g, 19 mmol) and K<sub>2</sub>CO<sub>3</sub> (3.0 g, 22 mmol) in MeOH (230 mL). Colorless oil.  $[\alpha]_{\text{D}}^{25}$  (*c* 1.00, CHCl<sub>3</sub>) +52.5; IR (neat)  $\nu$  3031, 2932, 1454, 1095, 736, 697 cm<sup>-1</sup>. <sup>1</sup>H NMR (400 MHz, CDCl<sub>3</sub>)  $\delta$  2.52 (1H, d, *J* = 2.0 Hz), 3.29 (3H, s), 3.45 (3H, s), 3.76 (1H, dd, *J* = 7.0, 2.5 Hz), 3.92 (1H, dd, *J* = 7.9, 2.5 Hz), 4.28 (1H, d, *J* = 11.4 Hz), 4.43 (1H, dd, *J* = 7.9, 2.0 Hz), 4.47 (1H, d, *J* = 11.5 Hz), 4.51 (1H, d, *J* = 7.0 Hz), 4.66 (1H, d, *J* = 11.2 Hz), 4.78 (1H, d, *J* = 11.5 Hz), 4.80 (1H, d, *J* = 11.4 Hz), 5.01 (1H, d, *J* = 11.2 Hz), 7.18-7.35 (13H, m), 7.40 (2H, d, *J* = 7.5 Hz). <sup>13</sup>C NMR (100 MHz, CDCl<sub>3</sub>)  $\delta$  53.9, 56.3, 68.6, 70.3, 74.4, 74.9, 75.2, 78.2, 80.3, 81.8, 105.3, 127.4, 127.5, 127.6, 127.9, 127.9, 128.1, 128.1, 128.3, 137.6, 138.5, 138.7; MS (ESI-TOF) *m/z* 483 [M+Na]<sup>+</sup>; HRMS calcd for C<sub>29</sub>H<sub>32</sub>NaO<sub>5</sub> [M+Na]<sup>+</sup>, 483.2147; found, 483.2122. Anal. Calcd for C<sub>29</sub>H<sub>32</sub>O<sub>5</sub>: C, 75.63; H, 7.00. Found: C, 75.49; H, 7.00.

**(4*S*,5*S*,6*R*,7*R*)-4,5,6-Tri(benzyloxy)-7-methoxy-4,5,6,7-tetrahydro[1,2,3]triazolo[1,5-*a*]pyridine (5c- $\alpha$ ) and (4*S*,5*S*,6*R*,7*S*)-4,5,6-tri(benzyloxy)-7-methoxy-4,5,6,7-tetrahydro[1,2,3]triazolo[1,5-*a*]pyridine (5c- $\beta$ ).**

According to the synthetic procedure for **5a**, these compounds were prepared in 90% yield (**5c- $\alpha$**  30.2 mg, 0.064 mmol, 32% yield; **5c- $\beta$**  54.7 mg, 0.116 mmol, 58% yield) by the reaction of **4c** (92 mg, 0.20 mmol) and TMSN<sub>3</sub> (120  $\mu$ L, 1.0 mmol) in the presence of In(OTf)<sub>3</sub> (5.6 mg, 10  $\mu$ mol) in 1,2-dichloroethane (2.8 mL). **5c- $\alpha$**  as a less polar isomer. Colorless oil.  $[\alpha]_{\text{D}}^{25}$  (*c* 1.01, CHCl<sub>3</sub>) +35.4; IR (neat)  $\nu$  3031, 2931, 1454, 1205, 1092, 739, 698 cm<sup>-1</sup>; <sup>1</sup>H-NMR (400 MHz, CDCl<sub>3</sub>)  $\delta$  3.65 (3H, s), 4.26 (1H, dd, *J* = 9.6, 3.8 Hz), 4.44 (1H, dd, *J* = 9.6, 3.6 Hz), 4.62 (1H, d, *J* = 12.2 Hz), 4.70 (1H, d, *J* = 12.2 Hz), 4.74 (1H, d, *J* = 11.8 Hz), 4.84 (1H, d, *J* = 3.8 Hz), 4.86 (1H, d, *J* = 12.0 Hz), 4.89 (1H, d, *J* = 11.8 Hz), 4.96 (1H, d, *J* = 12.0 Hz), 5.61 (1H, d, *J* = 3.6 Hz), 7.30-7.44 (15H, m), 7.56 (1H, s); <sup>13</sup>C NMR (100 MHz, CDCl<sub>3</sub>)  $\delta$  59.0, 66.7, 71.7, 73.7, 74.2, 74.7, 74.9, 86.4, 127.8, 127.8, 128.0, 128.1, 128.1, 128.4, 128.5, 128.5, 132.3, 132.5, 137.1, 137.7, 138.0; MS (ESI-TOF) *m/z* 472 [M+H]<sup>+</sup>; HRMS calcd for C<sub>28</sub>H<sub>30</sub>N<sub>3</sub>O<sub>4</sub> [M+H]<sup>+</sup>, 472.2236; found, 472.2347. **5c- $\beta$**  as a more polar isomer. White amorphous solid. Mp. 56.0-62.0 °C;  $[\alpha]_{\text{D}}^{25}$  (*c* 1.00, CHCl<sub>3</sub>) +51.7; IR (neat)  $\nu$  3030, 2929, 1454, 1191, 1118, 740, 698 cm<sup>-1</sup>; <sup>1</sup>H NMR (400 MHz, CDCl<sub>3</sub>)  $\delta$  3.69 (1H, dd, *J* = 9.2, 3.1 Hz), 3.79 (3H, s), 4.51 (1H, d, *J* = 12.5 Hz), 4.58 (1H, dd, *J* = 9.2, 4.6 Hz), 4.67 (1H, d, *J* = 12.0 Hz), 4.71 (1H, d, *J* = 12.5 Hz), 4.75 (1H, d, *J* = 3.1 Hz), 4.78 (1H, d, *J* = 3.1 Hz), 4.89 (1H, d, *J* = 11.3 Hz), 4.96 (1H, d, *J* = 11.3 Hz), 5.56 (1H, d, *J* = 4.6 Hz), 7.30-7.43 (15H, m), 7.57 (1H, s); <sup>13</sup>C NMR (100.6 MHz, CDCl<sub>3</sub>)  $\delta$  59.1, 65.1, 70.8, 72.6, 74.9, 77.9, 79.4, 90.9, 127.7, 127.8, 127.8, 127.9, 127.9, 128.0, 128.3, 128.4, 131.9, 131.9, 137.0, 137.5, 137.7; MS (ESI-TOF) *m/z* 472 [M+H]<sup>+</sup>; HRMS calcd for C<sub>28</sub>H<sub>30</sub>N<sub>3</sub>O<sub>4</sub> [M+H]<sup>+</sup>, 472.2236; found, 472.2232; Anal. Calcd for C<sub>28</sub>H<sub>29</sub>N<sub>3</sub>O<sub>5</sub>: C, 71.32; H, 6.20; N, 8.91. Found: C, 71.01; H, 6.20; N, 8.99.

**(4*S*,5*S*,6*R*,7*R*)-4,5,6-Trihydroxy-7-methoxy-4,5,6,7-tetrahydro[1,2,3]triazolo[1,5-*a*]pyridine (6c- $\alpha$ ).** According to the synthetic

procedure for **6a- $\alpha$** , triol **6c- $\alpha$**  was obtained in 83% yield (34.9 mg, 0.174 mmol) by the debenzoylation reaction of **5c- $\alpha$**  (100 mg, 0.21 mmol) in the presence of Pd(OH)<sub>2</sub> on carbon (20 w/w%, 118 mg) in MeOH (3.0 mL) under H<sub>2</sub> atmosphere (1 atm). Colorless oil.  $[\alpha]_D^{25}$  (*c* 1.00, CH<sub>3</sub>OH) +91.2; IR (neat)  $\nu$  3358, 2937, 1448, 1191, 1110, 827 cm<sup>-1</sup>; <sup>1</sup>H NMR (400 MHz, D<sub>2</sub>O)  $\delta$  3.71 (3H, s), 4.33 (1H, dd, *J* = 9.6, 4.1 Hz), 4.44 (1H, dd, *J* = 9.6, 3.7 Hz), 5.24 (1H, d, *J* = 4.1 Hz), 5.92 (1H, d, *J* = 3.7 Hz), 7.93 (1H, s). <sup>13</sup>C NMR (100 MHz, CDCl<sub>3</sub>)  $\delta$  60.9, 62.9, 69.0, 69.4, 89.0, 135.1, 137.4; MS (ESI-TOF) *m/z* 202 [M+H]<sup>+</sup>; HRMS calcd for C<sub>28</sub>H<sub>30</sub>N<sub>3</sub>O<sub>4</sub> [M+H]<sup>+</sup>, 202.0828; found, 202.0823.

**(4S,5S,6R,7S)-4,5,6-Trihydroxy-7-methoxy-4,5,6,7-tetrahydro[1,2,3]triazolo[1,5-*a*]pyridine (6c- $\beta$ )**. According to the synthetic procedure for **6a- $\alpha$** , triol **6c- $\beta$**  was obtained in 90% yield (37.9 mg, 0.189 mmol) by the debenzoylation reaction of **5c- $\beta$**  (100 mg, 0.21 mmol) in the presence of Pd(OH)<sub>2</sub> on carbon (20 w/w%, 121 mg) in MeOH (3.0 mL) under H<sub>2</sub> atmosphere (1 atm). Colorless oil.  $[\alpha]_D^{25}$  (*c* 1.00, CH<sub>3</sub>OH) +11.2; IR (neat)  $\nu$  3358, 2927, 1456, 1254, 1115, 1056, 838 cm<sup>-1</sup>; <sup>1</sup>H NMR (400 MHz, D<sub>2</sub>O)  $\delta$  3.81 (3H, s), 4.08 (1H, dd, *J* = 8.7, 3.8 Hz), 4.42 (1H, dd, *J* = 8.7, 5.4 Hz), 5.18 (1H, d, *J* = 3.8 Hz), 5.61 (1H, d, *J* = 5.4 Hz), 7.90 (1H, s); <sup>13</sup>C NMR (100 MHz, D<sub>2</sub>O)  $\delta$  60.9, 63.1, 71.29, 71.33, 92.5, 134.5, 137.3; MS (ESI-TOF) *m/z* 202 [M+H]<sup>+</sup>; HRMS calcd for C<sub>7</sub>H<sub>12</sub>N<sub>3</sub>O<sub>4</sub> [M+H]<sup>+</sup>, 202.0828; found, 202.0817.

### 3. Preparation of triazolo-gulose mimic **ent-5b**

**tert-Butyl(dimethyl){[(2S,3S,4S)-2,3,4-tri(benzyloxy)hex-5-enyl]oxy}silane (7c)**. According to the synthetic procedure for **7a**, TBS ether **7c** was prepared in 96% yield (5.53 g, 10.4 mmol) by the reaction of (2S,3S,4S)-2,3,4-tri(benzyloxy)hex-5-en-1-ol (4.5 g, 11 mmol),<sup>3</sup> which was prepared by NaBH<sub>4</sub> reduction of **1b**, imidazole (1.1 g, 16 mmol) and *tert*-butylchlorodimethylsilane (2.0 g, 13 mmol) in DMF (50 mL). Colorless oil.  $[\alpha]_D^{25}$  (*c* 1.01, CHCl<sub>3</sub>) +14.8; IR (neat)  $\nu$  3031, 2928, 2856, 1254, 1091, 837, 697 cm<sup>-1</sup>. <sup>1</sup>H NMR (400 MHz, CDCl<sub>3</sub>)  $\delta$  -0.05 (3H, s), -0.05 (3H, s), 0.83 (9H, s), 3.62 (2H, d, *J* = 6.0 Hz), 3.68 (1H, dd, *J* = 6.5, 3.6 Hz), 3.70-3.75 (1H, m), 4.04-4.09 (1H, m), 4.19 (1H, d, *J* = 11.7 Hz), 4.51-4.57 (3H, m), 4.59 (1H, d, *J* = 11.8 Hz), 4.67 (1H, d, *J* = 11.3 Hz), 5.32 (1H, brd, *J* = 17.5 Hz), 5.36 (1H, brd, *J* = 10.2 Hz), 5.92 (1H, ddd, *J* = 17.5, 10.2, 7.7 Hz), 7.19-7.30 (15H, m); <sup>13</sup>C NMR (100 MHz, CDCl<sub>3</sub>)  $\delta$  -5.4, -5.4, 18.2, 25.9, 62.9, 70.1, 73.5, 74.5, 79.6, 80.1, 80.8, 119.2, 127.4, 127.4, 127.5, 127.6, 128.0, 128.1, 128.2, 128.3, 136.4, 138.6, 138.6, 139.0; MS (ESI-TOF) *m/z* 555 [M+Na]<sup>+</sup>; HRMS calcd for C<sub>33</sub>H<sub>44</sub>NaO<sub>4</sub>Si [M+H]<sup>+</sup>, 555.2907; found, 555.2863. Anal. Calcd for C<sub>33</sub>H<sub>44</sub>O<sub>4</sub>Si: C, 74.39; H, 8.32. Found: C, 73.99; H, 8.23.

**(2R,3R,4S)-2,3,4-Tri(benzyloxy)-5-[(*tert*-butyl(dimethyl)silyl]oxy}pentanal (8c)**. According to the synthetic procedure for **8a**, pentanal derivative **8c** was prepared in 84% yield (4.22 g, 7.90 mmol) by the reaction of **7c** (5.0 g, 9.4 mmol), OsO<sub>4</sub> (0.11 M in H<sub>2</sub>O, 9.1 mL, 1.0 mmol), NMO (3.0 g, 16.4 mmol) in a mixture of acetone (120 mL), H<sub>2</sub>O (30 mL) and *tert*-butyl alcohol (9 mL) and following treatment of reaction mixture by NaIO<sub>4</sub> (5 g). Colorless oil.  $[\alpha]_D^{25}$  (*c* 0.20, CHCl<sub>3</sub>) +12.0; IR (neat)  $\nu$  3031, 2928, 2856, 1733, 1455, 1254, 1092, 837, 697 cm<sup>-1</sup>; <sup>1</sup>H NMR (400 MHz, CDCl<sub>3</sub>)  $\delta$  0.03 (3H, s), 0.04 (3H, s), 0.90 (9H, s), 3.70-3.75 (1H, m), 3.82-3.85 (2H, m), 4.01 (1H, m), 4.11 (1H, dd, *J* = 3.8, 1.4 Hz), 4.46 (1H, d, *J* = 11.8 Hz), 4.55 (1H, d, *J* = 11.8 Hz), 4.59-4.69 (4H, m), 7.26-7.38 (15H, m), 9.70 (1H, d, *J* = 1.4 Hz); <sup>13</sup>C NMR (100 MHz, CDCl<sub>3</sub>)  $\delta$  -5.4, -5.4, 18.2, 25.9, 62.9, 72.7, 73.2, 73.7, 79.8, 80.0, 83.7, 127.7, 127.8, 127.8, 127.9, 128.0, 128.1, 128.3, 128.3, 128.4, 137.4, 137.8, 138.2, 201.6; MS (ESI-TOF) *m/z* 557 [M+Na]<sup>+</sup>; HRMS calcd for C<sub>32</sub>H<sub>42</sub>NaO<sub>5</sub>Si [M+Na]<sup>+</sup>, 557.2699; found, 557.2689.

***tert*-Butyl(dimethyl){[(2*S*,3*R*,4*R*)-2,3,4-tri(benzyloxy)-5,5-dimethoxypentyl]oxy}silane.** This compound was obtained in 89% yield (3.87 g, 6.65 mmol) by the reaction of **8c** (4.0 g, 7.5 mmol) and HC(OMe)<sub>3</sub> (15 mL) in the presence of *p*TsOH·H<sub>2</sub>O (50 mg). Colorless oil.  $[\alpha]_{\text{D}}^{25}$  (*c* 1.03, CHCl<sub>3</sub>) +11.7; IR (neat)  $\nu$  3030, 2928, 2856, 1455, 1254, 1073, 836, 697 cm<sup>-1</sup>; <sup>1</sup>H NMR (400 MHz, CDCl<sub>3</sub>)  $\delta$  0.04 (6H, s), 0.90 (9H, s), 3.41 (3H, s), 3.47 (3H, s), 3.75-3.83 (4H, m), 3.92-3.95 (1H, m), 4.59 (1H, d, *J* = 11.6 Hz), 4.61 (1H, d, *J* = 4.9 Hz), 4.61 (1H, d, *J* = 11.8 Hz), 4.67 (1H, d, *J* = 11.8 Hz), 4.70 (1H, d, *J* = 11.5 Hz), 4.73 (1H, d, *J* = 11.5 Hz), 4.84 (1H, d, *J* = 11.6 Hz), 7.26-7.36 (15H, m); <sup>13</sup>C NMR (100 MHz, CDCl<sub>3</sub>)  $\delta$  -5.4, -5.4, 18.3, 25.9, 55.3, 56.0, 63.1, 73.1, 73.8, 74.2, 79.1, 79.5, 80.5, 105.3, 127.3, 127.3, 127.4, 127.6, 127.9, 127.9, 128.1, 128.2, 138.9, 139.1; MS (ESI-TOF) *m/z* 603 [M+Na]<sup>+</sup>; HRMS calcd for C<sub>34</sub>H<sub>48</sub>NaO<sub>6</sub>Si [M+Na]<sup>+</sup>, 603.3118; found, 603.3127. Anal. Calcd for C<sub>34</sub>H<sub>48</sub>O<sub>6</sub>Si: C, 70.31; H, 8.33. Found: C, 70.47; H, 8.29.

**(2*S*,3*R*,4*R*)-2,3,4-Tri(benzyloxy)-5,5-dimethoxypentan-1-ol (9c).** According to the synthetic procedure for **9a**, 5,5-dimethoxypentan-1-ol derivative **9c** was prepared in 88% yield (2.48 g, 5.31 mmol) by the reaction of *tert*-butyl(dimethyl){[(2*S*,3*R*,4*R*)-2,3,4-tri(benzyloxy)-5,5-dimethoxypentyl]oxy}silane (3.5 g, 6.0 mmol) and TBAF (1.0 M in THF, 12 mL, 12 mmol) in THF (5 mL). Colorless oil.  $[\alpha]_{\text{D}}^{25}$  (*c* 0.21, CHCl<sub>3</sub>) +16.7; IR (neat)  $\nu$  3459, 3030, 2832, 1454, 1207, 1072, 737, 698 cm<sup>-1</sup>. <sup>1</sup>H NMR (400 MHz, CDCl<sub>3</sub>)  $\delta$  2.45 (1H, brs), 3.33 (3H, s), 3.41 (3H, s), 3.67-3.74 (4H, m), 3.88 (1H, dd, *J* = 5.7, 3.3 Hz), 4.53-4.69 (6H, m), 4.76 (1H, d, *J* = 11.5 Hz), 7.21-7.32 (15H, m); <sup>13</sup>C NMR (100 MHz, CDCl<sub>3</sub>)  $\delta$  55.6, 55.8, 61.4, 72.6, 73.7, 74.2, 79.7, 79.9, 79.9, 105.1, 127.5, 127.5, 127.6, 127.8, 127.9, 127.9, 128.2, 128.3, 138.2, 138.4, 138.5; MS (ESI-TOF) *m/z* 489 [M+Na]<sup>+</sup>; HRMS calcd for C<sub>28</sub>H<sub>34</sub>NaO<sub>6</sub> [M+Na]<sup>+</sup>, 489.2253; found, 489.2255. Anal. Calcd for C<sub>28</sub>H<sub>34</sub>O<sub>6</sub>: C, 72.08; H, 7.35. Found: C, 71.97; H, 7.37.

**(2*R*,3*R*,4*R*)-2,3,4-Tri(benzyloxy)-5,5-dimethoxypentanal (ent-3b).** According to the synthetic procedure for **ent-3a**, 5,5-dimethoxypentanal derivative **ent-3b** was prepared in 88% yield (1.75 g, 3.78 mmol) by the reaction of **7c** (2.0 g, 4.3 mmol) and DMP (3.0 g, 7.2 mmol) in CH<sub>2</sub>Cl<sub>2</sub> (15 mL). The physical data of **ent-3b** were coincident with those of **3b**, except for specific optical rotation.  $[\alpha]_{\text{D}}^{25}$  (*c* 1.00, CHCl<sub>3</sub>) +29.8.

**(2*R*,3*R*,4*S*)-2,3,4-Tri(benzyloxy)-1,1-dimethoxyhex-5-yne (ent-4b).** This compound was prepared from **ent-3b** under the same conditions in a case of **4b**. The physical data of **ent-3b** were coincident with those of **3b**, except for specific optical rotation.  $[\alpha]_{\text{D}}^{25}$  (*c* 0.99, CHCl<sub>3</sub>) +52.7.

**(4*S*,5*R*,6*R*,7*S*)-4,5,6-Tri(benzyloxy)-7-methoxy-4,5,6,7-tetrahydro[1,2,3]triazolo[1,5-*a*]pyridine (ent-5b- $\alpha$ ) and**

**(4*S*,5*R*,6*R*,7*R*)-4,5,6-tri(benzyloxy)-7-methoxy-4,5,6,7-tetrahydro[1,2,3]triazolo[1,5-*a*]pyridine (ent-5b- $\beta$ ).**

According to the synthetic procedure for **5b**, these compounds were prepared in 86% yield (**ent-5b- $\alpha$**  45.2 mg, 95  $\mu$ mol, 48% yield; **ent-5b- $\beta$**  36.0 mg, 76  $\mu$ mol, 38% yield) by the reaction of **ent-5b** (92.1 mg, 0.20 mmol) and TMSN<sub>3</sub> (120  $\mu$ L, 1.0 mmol) in the presence of In(OTf)<sub>3</sub> (5.6 mg, 10  $\mu$ mol) in 1,2-dichloroethane (3.0 mL). The physical data of **ent-5b- $\alpha$**  were coincident with those of **5b- $\alpha$** , except for specific optical rotation.  $[\alpha]_{\text{D}}^{25}$  (*c* 0.21, CHCl<sub>3</sub>) +23.5. The physical data of **ent-5b- $\beta$**  were also coincident with those of **5b- $\beta$** , except for specific optical rotation.  $[\alpha]_{\text{D}}^{25}$  (*c* 1.00, CHCl<sub>3</sub>) +74.5.

#### 4. Preparation of triazolo-altrose mimic **ent-5c**

**tert-Butyl(dimethyl){[(2R,3S,4R)-2,3,4-tri(benzyloxy)hex-5-enyl]oxy}silane (7b).** According to the synthetic procedure for **7a**, TBS ether **7b** was prepared in 89% yield (3.98 g, 7.49 mmol) by the reaction of (2R,3S,4R)-2,3,4-tri(benzyloxy)hex-5-en-1-ol (3.5 g, 8.4 mmol),<sup>3</sup> which was prepared by NaBH<sub>4</sub> reduction of **1b**, imidazole (743 mg, 11 mmol) and *tert*-butylchlorodimethylsilane (1.52 g, 10 mmol) in DMF (9.0 mL). Colorless oil.  $[\alpha]_{\text{D}}^{25}$  (*c* 1.00, CHCl<sub>3</sub>) -14.1; IR (neat)  $\nu$  2928, 2856, 1455, 1253, 1093, 836, 734, 697 cm<sup>-1</sup>; <sup>1</sup>H NMR (400 MHz, CDCl<sub>3</sub>)  $\delta$  0.05 (6H, s), 0.91 (9H, s), 3.67-3.72 (1H, m), 3.72-3.79 (1H, m), 3.83 (1H, dd, *J* = 10.9, 5.3 Hz), 3.96 (1H, dd, *J* = 10.9, 2.9 Hz), 4.13 (1H, dd, *J* = 7.7, 4.2 Hz), 4.34 (1H, d, *J* = 11.9 Hz), 4.40 (1H, d, *J* = 11.5 Hz), 4.63 (1H, d, *J* = 11.9 Hz), 4.65 (1H, d, *J* = 11.5 Hz), 4.70-4.73 (2H, m), 5.27 (1H, brd, *J* = 10.4 Hz), 5.33 (1H, brd, *J* = 17.4 Hz), 5.91 (1H, ddd, *J* = 17.4, 10.4, 7.7 Hz), 7.18-7.36 (15H, m); <sup>13</sup>C NMR (100 MHz, CDCl<sub>3</sub>)  $\delta$  -5.4, 18.2, 25.9, 62.6, 70.5, 72.3, 74.7, 79.8, 80.5, 81.5, 118.2, 127.3, 127.3, 127.4, 127.6, 127.9, 128.0, 128.1, 128.1, 136.2, 138.5, 138.6, 138.7; MS (ESI-TOF) *m/z* 533 [M+H]<sup>+</sup>; HRMS calcd for C<sub>33</sub>H<sub>45</sub>O<sub>4</sub>Si [M+H]<sup>+</sup>, 533.3087; found, 533.3120.

**(2S,3R,4R)-2,3,4-Tri(benzyloxy)-5-{*tert*-butyl(dimethyl)silyl}oxy}pentanal (8b).** According to the synthetic procedure for **8a**, pentanal derivative **8b** was prepared in 92% yield (3.49 g, 6.50 mmol) by the reaction of **7b** (3.78 g, 7.1 mmol), OsO<sub>4</sub> (0.11 M in H<sub>2</sub>O, 6.4 mL, 0.7 mmol), NMO (1.6 g, 14 mmol) in a mixture of acetone (100 mL), H<sub>2</sub>O (35 mL) and *tert*-butyl alcohol (3 mL) and following treatment of reaction mixture by NaIO<sub>4</sub> (15 g). Colorless oil.  $[\alpha]_{\text{D}}^{25}$  (*c* 1.02, CHCl<sub>3</sub>) -34.1; IR (neat)  $\nu$  3032, 2952, 2929, 1731, 1455, 1327, 1253, 1096, 1028, 736, 697 cm<sup>-1</sup>; <sup>1</sup>H NMR (400 MHz, CDCl<sub>3</sub>)  $\delta$  0.01 (3H, s), 0.02 (3H, s), 0.88 (9H, s), 3.66-3.74 (1H, m), 3.78 (1H, dd, *J* = 11.2, 4.2 Hz), 3.95 (1H, dd, *J* = 11.2, 2.9 Hz), 4.03-4.07 (2H, m), 4.32 (1H, d, *J* = 11.5 Hz), 4.47 (1H, d, *J* = 11.8 Hz), 4.52 (1H, d, *J* = 11.3 Hz), 4.57 (1H, d, *J* = 11.3 Hz), 4.62 (1H, d, *J* = 11.8 Hz), 4.64 (1H, d, *J* = 11.5 Hz), 7.18-7.30 (15H, m), 9.58 (1H, d, *J* = 1.4 Hz); <sup>13</sup>C NMR (100 MHz, CDCl<sub>3</sub>)  $\delta$  -5.4, -5.4, 18.3, 25.9, 61.4, 72.0, 73.2, 74.1, 78.4, 78.9, 84.2, 127.5, 127.7, 127.8, 128.0, 128.1, 128.2, 128.3, 128.3, 128.4, 137.3, 137.8, 138.1, 202.2; MS (ESI-TOF) *m/z* 535 [M+H]<sup>+</sup>; HRMS calcd for C<sub>32</sub>H<sub>43</sub>O<sub>5</sub>Si [M+H]<sup>+</sup>, 535.2880; found, 535.2889.

**tert-Butyl(dimethyl){[(2R,3R,4S)-2,3,4-tri(benzyloxy)-5,5-dimethoxypentyl]oxy}silane.** This compound was obtained in 100% yield (3.48 g, 6.00 mmol) by the reaction of **8b** (3.2 g, 6.0 mmol) and HC(OMe)<sub>3</sub> (15 mL) in the presence of *p*TsOH·H<sub>2</sub>O (20 mg). Colorless oil.  $[\alpha]_{\text{D}}^{25}$  (*c* 0.98, CHCl<sub>3</sub>) -7.20; IR (neat)  $\nu$  3031, 2929, 2856, 1454, 1096, 1028, 836, 734, 697 cm<sup>-1</sup>; <sup>1</sup>H NMR (400 MHz, CDCl<sub>3</sub>)  $\delta$  0.02 (3H, s), 0.02 (3H, s), 0.89 (9H, s), 3.28 (3H, s), 3.43 (3H, s), 3.73 (1H, ddd, *J* = 7.2, 4.8, 2.3 Hz), 3.76-3.82 (2H, m), 3.88 (1H, dd, *J* = 7.2, 2.6 Hz), 4.01 (1H, dd, *J* = 11.2, 2.3 Hz), 4.32 (1H, d, *J* = 11.7 Hz), 4.50 (1H, d, *J* = 11.6 Hz), 4.53 (1H, d, *J* = 7.1 Hz), 4.63 (1H, d, *J* = 11.6 Hz), 4.70 (1H, d, *J* = 11.7 Hz), 4.72 (1H, d, *J* = 11.6 Hz), 4.81 (1H, d, *J* = 11.6 Hz), 7.18-7.35 (15H, m); <sup>13</sup>C NMR (100 MHz, CDCl<sub>3</sub>)  $\delta$  -5.4, -5.3, 18.2, 25.9, 53.5, 55.9, 62.2, 71.8, 74.2, 74.3, 78.2, 78.8, 79.5, 105.4, 127.2, 127.4, 127.8, 127.9, 128.1, 128.2, 128.2, 138.9, 139.1; MS (ESI-TOF) *m/z* 603 [M+Na]<sup>+</sup>; HRMS calcd for C<sub>34</sub>H<sub>48</sub>NaO<sub>6</sub>Si [M+Na]<sup>+</sup>, 603.3118; found, 603.3062.

**(2R,3R,4S)-2,3,4-Tri(benzyloxy)-5,5-dimethoxypentan-1-ol (9b).** According to the synthetic procedure for **9a**, 5,5-dimethoxypentan-1-ol derivative **9b** was prepared in 98% yield (2.74 g, 5.88 mmol) by the reaction of *tert*-butyl(dimethyl){[(2R,3R,4S)-2,3,4-tri(benzyloxy)-5,5-dimethoxypentyl]oxy}silane (3.4 g, 6.0 mmol) and TBAF (1.0 M in THF, 12 mL, 12 mmol) in THF (5 mL). Colorless oil.  $[\alpha]_{\text{D}}^{25}$  (*c* 1.00, CHCl<sub>3</sub>) -8.70; IR (neat)  $\nu$  3481, 3031, 2933, 1454, 1092, 1029, 735, 697 cm<sup>-1</sup>; <sup>1</sup>H NMR (400 MHz, CDCl<sub>3</sub>)  $\delta$  3.28 (3H, s), 3.43 (3H, s), 3.65-3.70 (2H, m), 3.74 (1H, brd, *J* = 12.0 Hz), 3.85 (1H, dd,

$J = 12.0, 3.6$  Hz), 3.90 (1H, dd,  $J = 6.9, 2.9$  Hz), 4.29 (1H, d,  $J = 11.6$  Hz), 4.48 (1H, d,  $J = 12.0$  Hz), 4.50 (1H, d,  $J = 6.7$  Hz), 4.51 (1H, d,  $J = 12.0$  Hz), 4.63 (1H, d,  $J = 11.5$  Hz), 4.72 (1H, d,  $J = 11.5$  Hz), 4.81 (1H, d,  $J = 11.6$  Hz), 7.19-7.34 (15H, m);  $^{13}\text{C}$  NMR (100 MHz,  $\text{CDCl}_3$ )  $\delta$  54.1, 56.2, 60.2, 71.2, 74.1, 74.6, 78.1, 7.7, 78.9, 105.6, .127.5, 127.6, 127.6, 127.7, 128.0, 128.0, 128.2, 128.3, 128.4, 138.1, 138.4, 138.6; MS (ESI-TOF)  $m/z$  489  $[\text{M}+\text{Na}]^+$ ; HRMS calcd for  $\text{C}_{28}\text{H}_{34}\text{NaO}_6$   $[\text{M}+\text{Na}]^+$ , 489.2253; found, 489.2232.

**(2S,3R,4S)-2,3,4-Tri(benzyloxy)-5,5-dimethoxypentanal (ent-3c).** According to the synthetic procedure for *ent-3a*, 5,5-dimethoxypentanal derivative *ent-3c* was prepared in 88% yield (2.20 g, 4.73 mmol) by the reaction of **9b** (2.5 g, 5.4 mmol) and DMP (3.3 g, 8.0 mmol) in  $\text{CH}_2\text{Cl}_2$  (15 mL). The physical data of *ent-3c* were coincident with those of **3c**, except for specific optical rotation.  $[\alpha]_{\text{D}}^{25}$  ( $c$  1.00,  $\text{CHCl}_3$ )  $-8.20$ .

**(2S,3R,4R)-2,3,4-Tri(benzyloxy)-1,1-dimethoxyhex-5-yne (ent-4c).** This compound was prepared from *ent-3c* under the same conditions in a case of **4c**. The physical data of *ent-4c* were coincident with those of **4c**, except for specific optical rotation.  $[\alpha]_{\text{D}}^{25}$  ( $c$  1.01,  $\text{CHCl}_3$ )  $-54.2$ .

**(4R,5R,6S,7S)-4,5,6-Tri(benzyloxy)-7-methoxy-4,5,6,7-tetrahydro[1,2,3]triazolo[1,5-*a*]pyridine (ent-5c- $\alpha$ ) and (4R,5R,6S,7R)-4,5,6-tri(benzyloxy)-7-methoxy-4,5,6,7-tetrahydro[1,2,3]triazolo[1,5-*a*]pyridine (ent-5c- $\beta$ ).**

According to the synthetic procedure for **5c**, these compounds were prepared in 89% yield (*ent-5c- $\alpha$*  85.3 mg, 0.181 mmol, 28% yield; *ent-5c- $\beta$*  187.6 mg, 0.398 mmol, 61% yield) by the reaction of *ent-4c* (300 mg, 0.65 mmol) and  $\text{TMSN}_3$  (0.40 mL, 3.3 mmol) in the presence of  $\text{In}(\text{OTf})_3$  (18.2 mg, 32.5  $\mu\text{mol}$ ) in 1,2-dichloroethane (9.0 mL). The physical data of *ent-5c- $\alpha$*  were coincident with those of **5c- $\alpha$** , excluding specific optical rotation.  $[\alpha]_{\text{D}}^{25}$  ( $c$  1.01,  $\text{CHCl}_3$ )  $-36.8$ . The physical data of *ent-5c- $\beta$*  were also coincident with those of **5c- $\beta$** , except for specific optical rotation.  $[\alpha]_{\text{D}}^{25}$  ( $c$  0.98,  $\text{CHCl}_3$ )  $-51.3$ .



5.  $^1\text{H}$  and  $^{13}\text{C}$  NMR spectra of **2a**, **3a**, **4a**, **5a** and **6a**

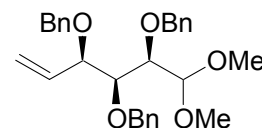

**2a**

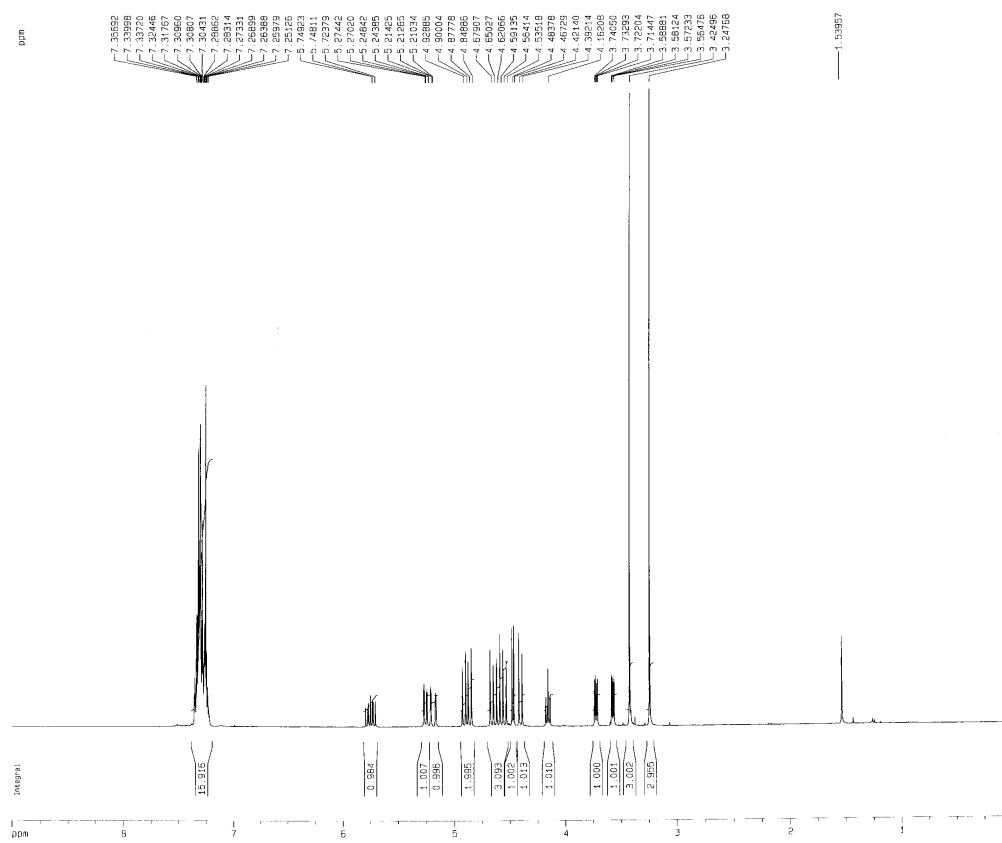

Current Data Parameters  
NAME G1c-6  
EXPNO 4  
PROCNO 1

F2 - Acquisition Parameters  
Date\_ 20080228  
Time 11.13  
INSTRUM spect  
PROBHD 5 mm QNP 1H/13  
PULPROG zg30  
TD 65536  
SOLVENT CDCl3  
NS 16  
DS 2  
SWH 8278.146 Hz  
FIDRES 0.126514 Hz  
AQ 3.9584243 sec  
RG 256  
DM 60.400 usec  
DE 6.00 usec  
TE 300.2 K  
D1 1.00000000 sec  
MCREST 0.00000000 sec  
MCWK 0.01500000 sec

----- CHANNEL f1 -----  
NUC1 1H  
P1 11.50 usec  
PL1 -4.00 dB  
SFO1 400.0324703 MHz

F2 - Processing parameters  
SI 32768  
SF 400.030067 MHz  
WDW EM  
SSB 0  
LB 0.30 Hz  
GB 6  
PC 1.00

1D NMR plot parameters  
CX 32.00 cm  
CY 21.00 cm  
F1P 9.000 ppm  
F2P 3600.27 Hz  
F3P 0.000 ppm  
F2 0.00 Hz  
PPMCM 0.28125 ppm/cm  
HZCM 112.50844 Hz/cm

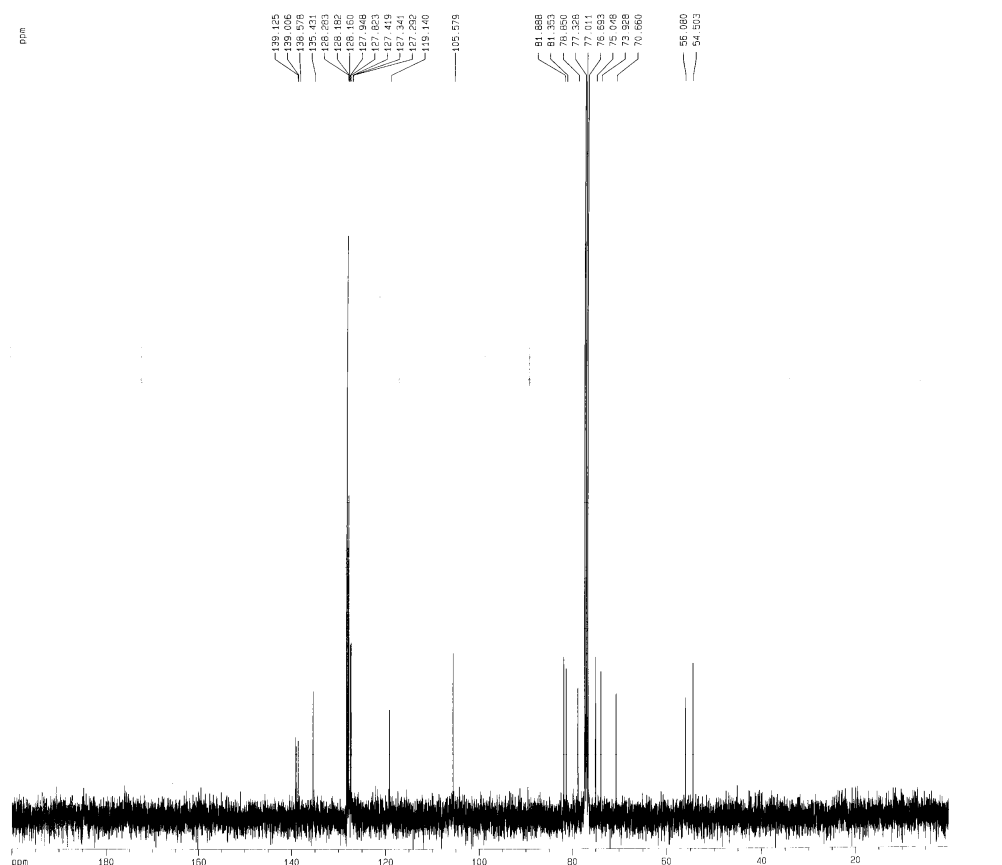

Current Data Parameters  
NAME G1c-6  
EXPNO 5  
PROCNO 1

F2 - Acquisition Parameters  
Date\_ 20080228  
Time 11.26  
INSTRUM spect  
PROBHD 5 mm QNP 1H/13  
PULPROG zgpg30  
TD 65536  
SOLVENT CDCl3  
NS 256  
DS 4  
SWH 26178.010 Hz  
FIDRES 0.359445 Hz  
AQ 1.2517875 sec  
RG 11505.2  
DM 19.100 usec  
DE 6.00 usec  
TE 300.2 K  
D1 2.00000000 sec  
SOL1 0.00000000 sec  
SOL2 1.85999998 sec  
MCREST 0.00000000 sec  
MCWK 0.01500000 sec

----- CHANNEL f1 -----  
NUC1 13C  
P1 10.00 usec  
PL1 -3.50 dB  
SFO1 100.5966886 MHz

----- CHANNEL f2 -----  
CPDPRG2 waltz16  
NUC2 1H  
PCPD2 100.00 usec  
PL2 -4.00 dB  
PL12 17.00 dB  
PL13 17.00 dB  
SFO2 400.0316001 MHz

F2 - Processing parameters  
SI 32768  
SF 100.5876230 MHz  
WDW EM  
SSB 0  
LB 1.00 Hz  
GB 0  
PC 1.40

1D NMR plot parameters  
CX 30.00 cm  
CY 19.00 cm  
F1P 206.000 ppm  
F2P 20117.52 Hz  
F3P -0.000 ppm  
F2 0.00 Hz  
PPMCM 6.65657 ppm/cm  
HZCM 670.58411 Hz/cm

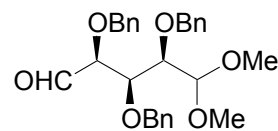

**3a**

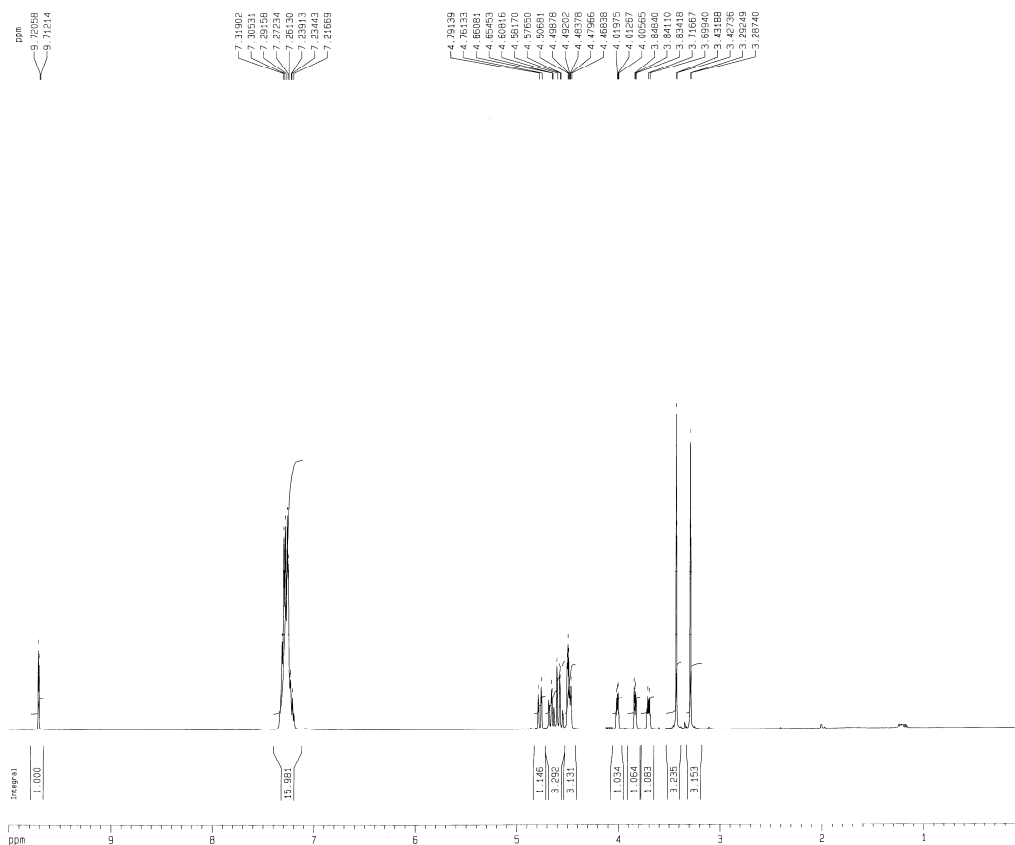

Current Data Parameters  
NAME A3C2-5a  
EXPNO 1  
PROCNO 1

F2 - Acquisition Parameters  
Date\_ 20050728  
Time 12.22  
INSTRUM dp4400  
PROBHD 5 mm QNP 1H/1  
PULPROG zg30  
TD 32768  
SOLVENT cdcl3  
NS 32  
DS 0  
SWH 6793.478 Hz  
FIDRES 0.207320 Hz  
AQ 2.4117749 sec  
RG 45.3  
DM 73.600 usec  
DE 6.00 usec  
TE 300.2 K  
D1 1.00000000 sec  
MCREST 0.00000000 sec  
MCWVK 0.01500000 sec

===== CHANNEL f1 =====  
NUC1 1H  
P1 7.40 usec  
PL1 8.00 dB  
SF01 400.1326354 MHz

F2 - Processing parameters  
SI 16384  
SF 400.1300319 MHz  
WDW EM  
SSB 0  
IR 0.30 Hz  
GB 0  
PC 1.00

1D NMR plot parameters  
CX 32.00 cm  
CY 10.00 cm  
F1P 10.000 ppm  
F1 4001.30 Hz  
F2P 0.000 ppm  
F2 0.00 Hz  
FPC 0.31250 ppm/cm  
H2CM 125.04063 Hz/cm

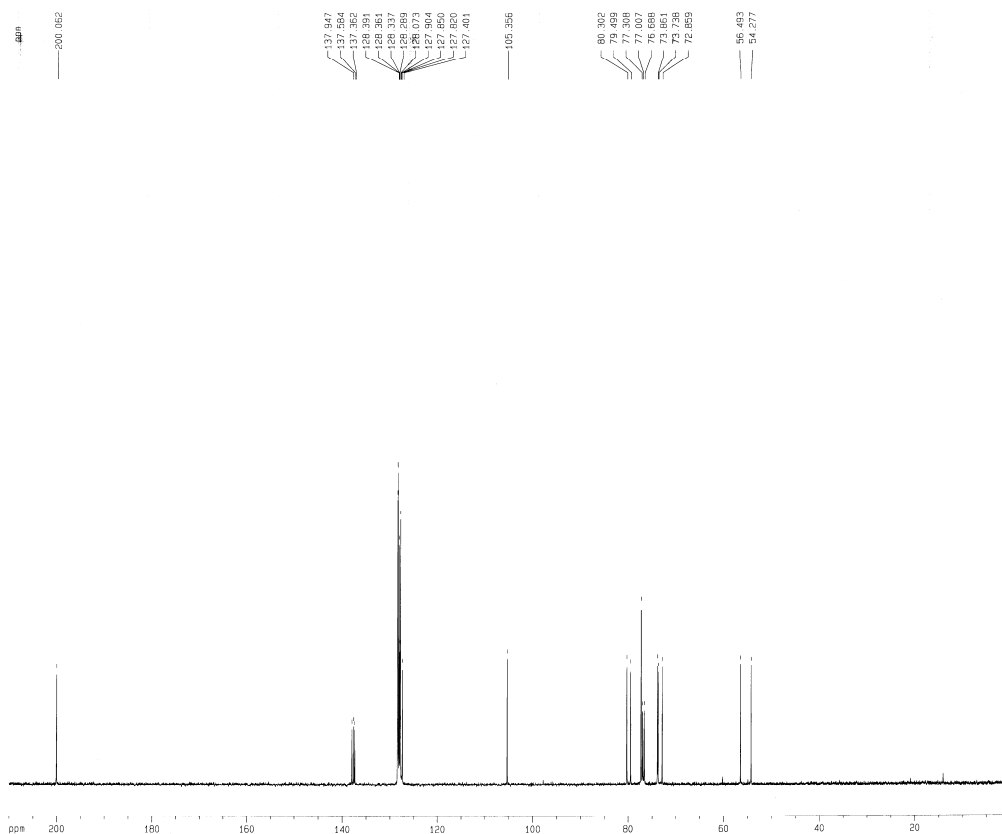

Current Data Parameters  
NAME A3C2-5a  
EXPNO 2  
PROCNO 1

F2 - Acquisition Parameters  
Date\_ 20050728  
Time 12.29  
INSTRUM dp4400  
PROBHD 5 mm QNP 1H/1  
PULPROG zgpg30  
TD 65536  
SOLVENT cdcl3  
NS 112  
DS 2  
SWH 26176.010 Hz  
FIDRES 0.399444 Hz  
AQ 1.2517875 sec  
RG 16384  
DM 19.100 usec  
DE 6.00 usec  
TE 300.2 K  
D1 2.00000000 sec  
d11 0.03000000 sec  
DELTA 1.88999999 sec  
MCREST 0.00000000 sec  
MCWVK 0.01500000 sec

===== CHANNEL f1 =====  
NUC1 13C  
P1 8.00 usec  
PL1 -6.00 dB  
SF01 100.6238401 MHz

===== CHANNEL f2 =====  
CPDPRG2 waltz16  
NUC2 1H  
PCPD2 100.00 usec  
PL2 -6.00 dB  
PL12 16.40 dB  
PL13 16.40 dB  
SF02 400.1316005 MHz

F2 - Processing parameters  
SI 32768  
SF 100.6127853 MHz  
WDW EM  
SSB 0  
LB 2.00 Hz  
GB 0  
PC 1.40

1D NMR plot parameters  
CX 32.00 cm  
CY 10.00 cm  
F1P 210.000 ppm  
F1 21128.89 Hz  
F2P 0.000 ppm  
F2 0.00 Hz  
FPC 6.56250 ppm/cm  
H2CM 660.07140 Hz/cm

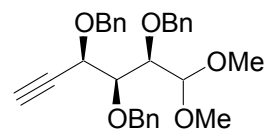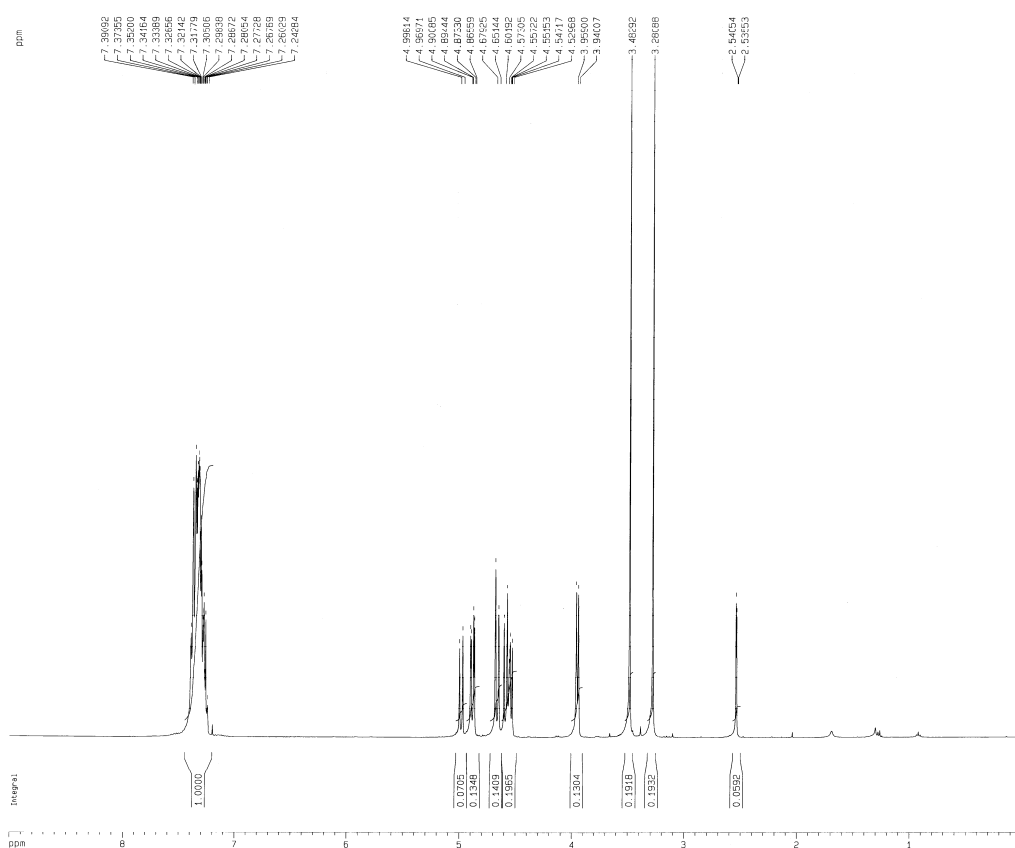

Current Data Parameters  
NAME A3C2-7a  
EXPNO 1  
PROCNO 1

F2 - Acquisition Parameters  
Date\_ 20050730  
Time 11.25  
INSTRUM gpcx400  
PROBHD 5 mm QNP 1H/1  
PULPROG zg30  
TD 32768  
SOLVENT CDCl3  
NS 32  
DS 2  
SWH 6793.478 Hz  
FIDRES 0.207320 Hz  
AQ 2.4117749 sec  
RG 95.5  
DM 73.500 usec  
DE 6.00 usec  
TE 300.2 K  
D1 1.00000000 sec  
MREST 0.00000000 sec  
MORCK 0.01500000 sec

----- CHANNEL f1 -----  
NUC1 1H  
P1 7.40 usec  
PL1 -6.00 dB  
SFO1 400.1363954 MHz

F2 - Processing parameters  
SI 32768  
SF 400.1300332 MHz  
WDW EM  
SSB 0  
LB 0.30 Hz  
GB 0  
PC 1.00

1D NMR plot parameters  
CX 32.00 cm  
CY 21.00 cm  
F1P 9.000 ppm  
F1 3601.17 Hz  
F2P 0.000 ppm  
F2 0.00 Hz  
PPMCM 0.28125 ppm/cm  
HZCM 112.53656 Hz/cm

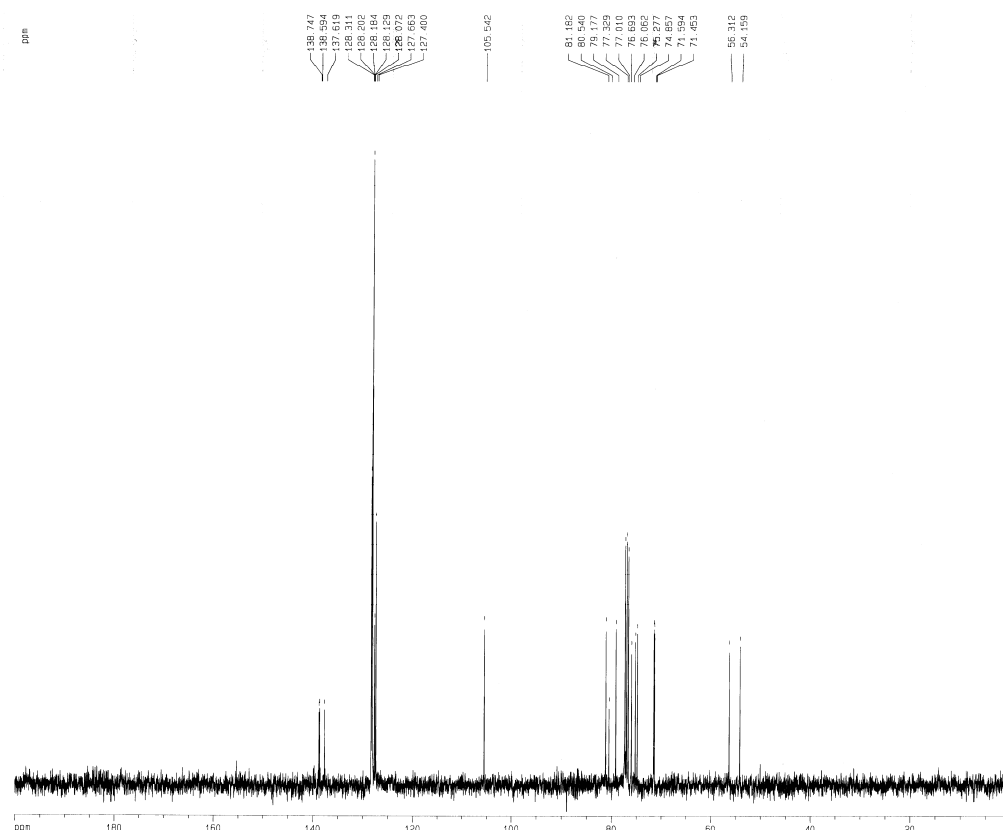

Current Data Parameters  
NAME A3C2-7a  
EXPNO 2  
PROCNO 1

F2 - Acquisition Parameters  
Date\_ 20050730  
Time 15.24  
INSTRUM gpcx400  
PROBHD 5 mm QNP 1H/1  
PULPROG zgpg30  
TD 65536  
SOLVENT CDCl3  
NS 18  
DS 2  
SWH 26176.010 Hz  
FIDRES 0.359445 Hz  
AQ 1.2517875 sec  
RG 2298 R  
DM 19.100 usec  
DE 6.00 usec  
TE 300.2 K  
D1 2.00000000 sec  
d11 0.03000000 sec  
DELTA 1.89999998 sec  
MREST 0.00000000 sec  
MORCK 0.01500000 sec

----- CHANNEL f1 -----  
NUC1 13C  
P1 8.00 usec  
PL1 -6.00 dB  
SFO1 100.6238401 MHz

----- CHANNEL f2 -----  
CPDPRG2 waltz16  
NUC2 1H  
PCPD2 100.00 usec  
PL2 -3.00 dB  
PL12 16.40 dB  
PL13 16.40 dB  
SFO2 400.1316005 MHz

F2 - Processing parameters  
SI 32768  
SF 100.6127774 MHz  
WDW EM  
SSB 0  
LB 2.00 Hz  
GB 0  
PC 1.40

1D NMR plot parameters  
CX 32.00 cm  
CY 20.00 cm  
F1P 200.900 ppm  
F1 20122.55 Hz  
F2P -0.000 ppm  
F2 -0.00 Hz  
PPMCM 6.25000 ppm/cm  
HZCM 626.62990 Hz/cm

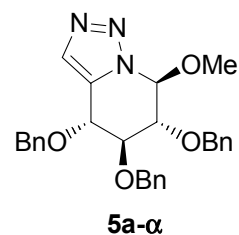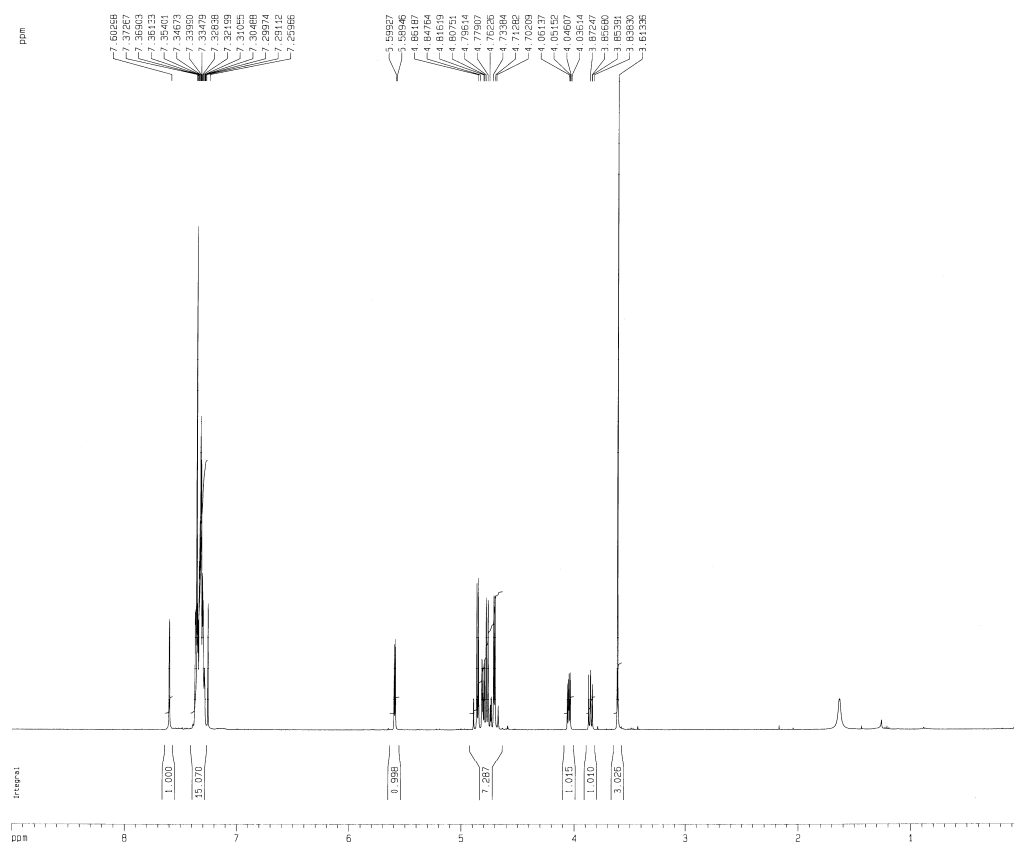

Current Data Parameters  
NAME A3C2-8a-less  
EXPNO 1  
PROCNO 1

F2 - Acquisition Parameters  
Date\_ 20050727  
Time 20.36  
INSTRUM gpc400  
PROBHD 5 mm QNP 1H/1  
PULPROG zg30  
TD 32768  
SOLVENT CDCl3  
NS 32  
DS 0  
SWH 6793.470 Hz  
FIDRES 0.207320 Hz  
AQ 2.4117749 sec  
RG 406.4  
DM 73.600 usec  
DE 9.00 usec  
TE 300.2 K  
D1 1.00000000 sec  
MCREST 0.00000000 sec  
MCWRR 0.01500000 sec

===== CHANNEL f1 =====  
NUC1 1H  
P1 7.40 usec  
PL1 -6.00 dB  
SFO1 400.1326324 MHz

F2 - Processing parameters  
SI 62684  
SF 400.1300095 MHz  
WDW EM  
SSB 0  
LB 0.30 Hz  
GB 0  
PC 1.00

1D NMR plot parameters  
CX 32.00 cm  
CY 21.00 cm  
F1P 9.000 ppm  
F1 3601.17 Hz  
F2P 0.000 ppm  
F2 0.00 Hz  
PPNMC 0.28125 ppm/cm  
HZCM 112.53656 Hz/cm

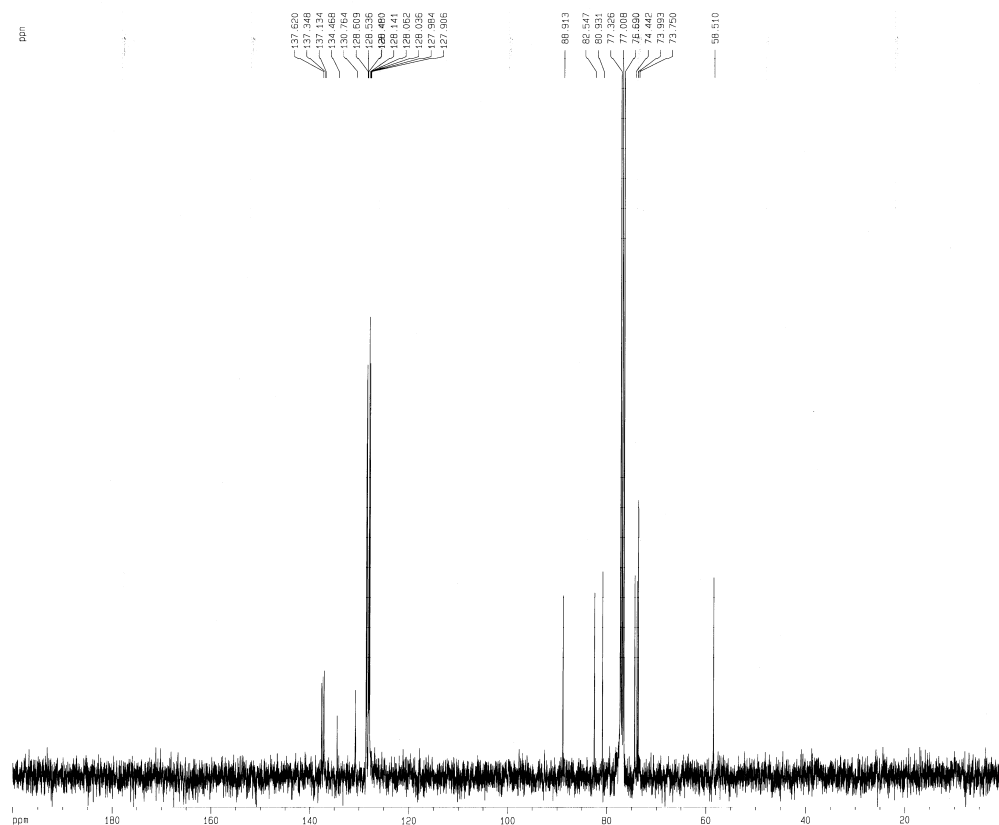

Current Data Parameters  
NAME A3C2-8a-less  
EXPNO 2  
PROCNO 1

F2 - Acquisition Parameters  
Date\_ 20050727  
Time 20.11  
INSTRUM gpc400  
PROBHD 5 mm QNP 1H/1  
PULPROG zgpg30  
TD 65536  
SOLVENT CDCl3  
NS 173  
DS 2  
SWH 26178.010 Hz  
FIDRES 0.399449 Hz  
AQ 1.2517075 sec  
RG 2048  
DM 19.100 usec  
DE 6.00 usec  
TE 300.2 K  
D1 2.00000000 sec  
d11 0.03000000 sec  
DELTA 1.89999998 sec  
MCREST 0.00000000 sec  
MCWRR 0.01500000 sec

===== CHANNEL f1 =====  
NUC1 13C  
P1 8.00 usec  
PL1 -6.00 dB  
SFO1 100.6238401 MHz

===== CHANNEL f2 =====  
CPDPRG2 waltz16  
NUC2 1H  
PCPD2 100.00 usec  
PL2 -6.00 dB  
PL12 16.40 dB  
PL13 16.40 dB  
SFO2 400.1316005 MHz

F2 - Processing parameters  
SI 32768  
SF 100.6127710 MHz  
WDW EM  
SSB 0  
LB 2.00 Hz  
GB 0  
PC 1.40

1D NMR plot parameters  
CX 32.00 cm  
CY 45.00 cm  
F1P 200.000 ppm  
F1 20122.55 Hz  
F2P -0.000 ppm  
F2 -0.00 Hz  
PPNMC 6.25000 ppm/cm  
HZCM 628.82383 Hz/cm

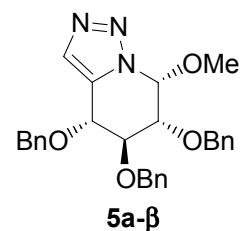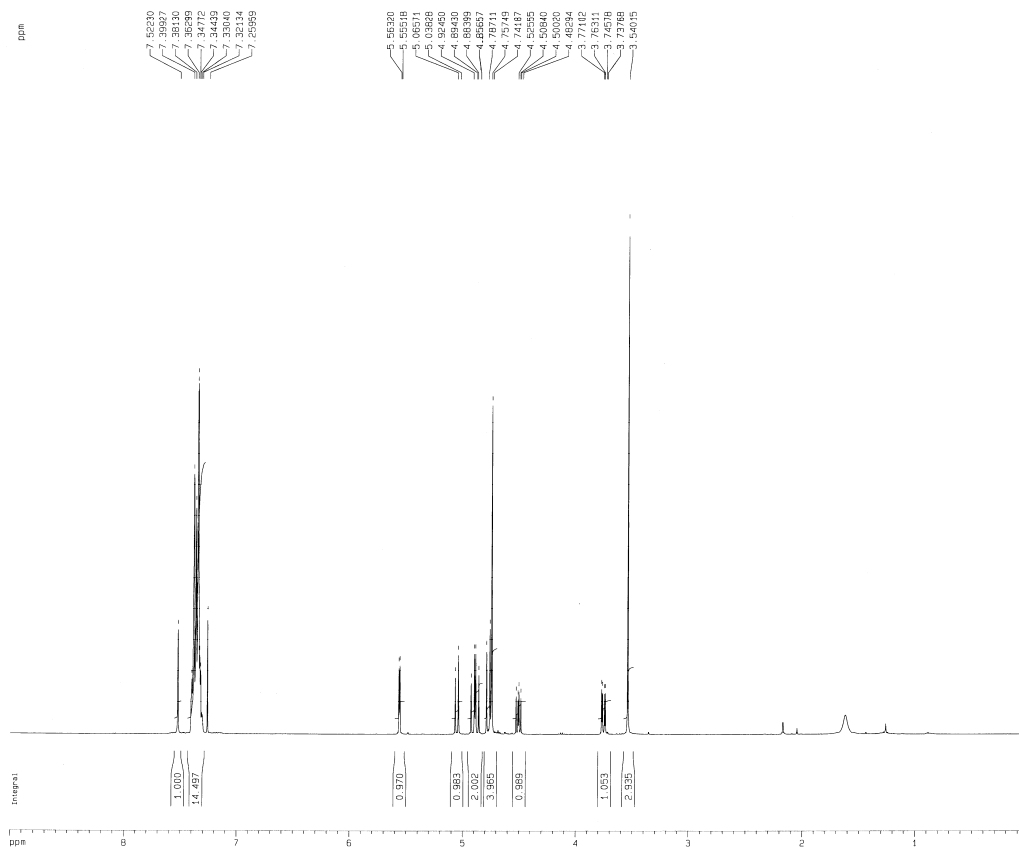

Current Data Parameters  
 NAME A3C2-Ba-more  
 EXPNO 1  
 PROCNO 1

F2 - Acquisition Parameters  
 Date\_ 20050728  
 Time 7.57  
 INSTRUM dp400  
 PROBHD 5 mm QNP 1H/1  
 PULPROG zg30  
 TD 32768  
 SOLVENT CDCl3  
 NS 32  
 DS 0  
 SWH 6793.478 Hz  
 FIDRES 0.207320 Hz  
 AQ 2.4117749 sec  
 RG 456.1  
 DW 73.600 usec  
 DE 6.00 usec  
 TE 300.2 K  
 D1 1.00000000 sec  
 MCREST 0.00000000 sec  
 MCKRK 0.01500000 sec

\*\*\*\*\* CHANNEL f1 \*\*\*\*\*  
 NUC1 1H  
 P1 7.40 usec  
 PL1 -6.00 dB  
 SF01 400.1326354 MHz

F2 - Processing parameters  
 SI 16384  
 SF 400.1300095 MHz  
 WDM EM  
 SSB 0  
 LB 0.30 Hz  
 GB 0  
 PC 1.00

1D NMR plot parameters  
 CX 32.00 cm  
 CY 45.00 cm  
 F1P 9.000 ppm  
 F1 3601.17 Hz  
 F2P 0.000 ppm  
 F2 0.00 Hz  
 PPMCM 0.2815 ppm/cm  
 HZCM 112.53656 Hz/cm

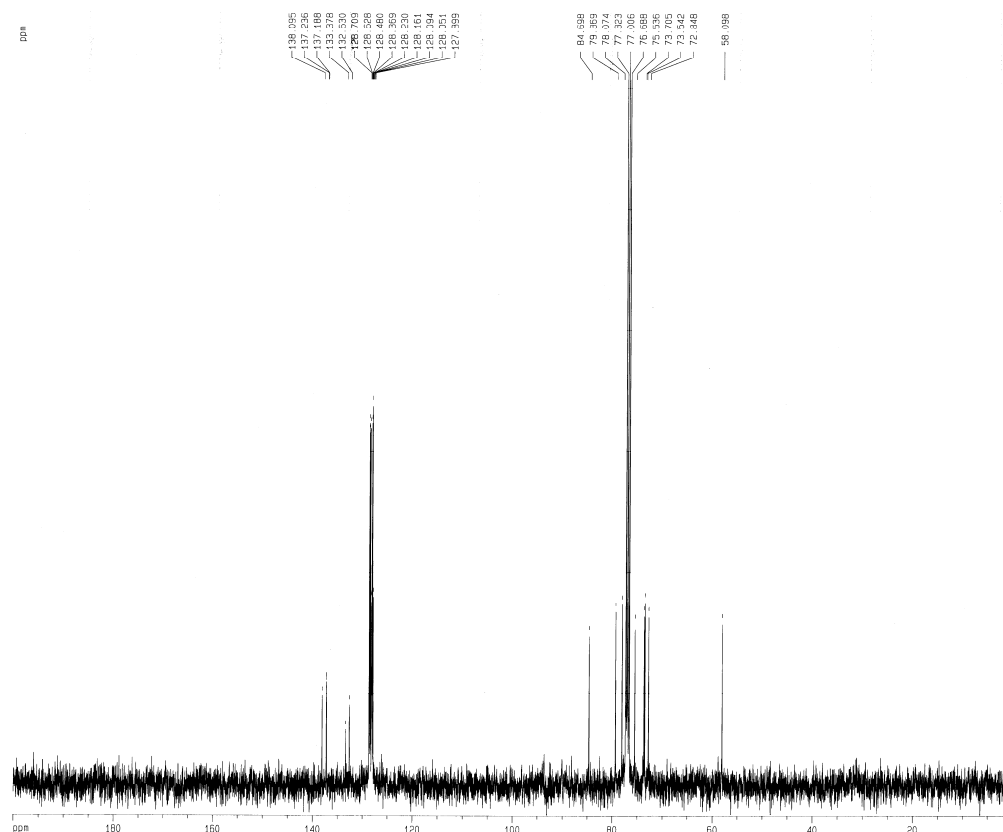

Current Data Parameters  
 NAME A3C2-Ba-more  
 EXPNO 2  
 PROCNO 1

F2 - Acquisition Parameters  
 Date\_ 20050728  
 Time 2.18  
 INSTRUM dp400  
 PROBHD 5 mm QNP 1H/1  
 PULPROG zgpg30  
 TD 65536  
 SOLVENT CDCl3  
 NS 173  
 DS 2  
 SWH 26178.010 Hz  
 FIDRES 0.399445 Hz  
 AQ 1.2517875 sec  
 RG 16304  
 DW 19.100 usec  
 DE 6.00 usec  
 TE 300.2 K  
 D1 2.00000000 sec  
 d11 0.03000000 sec  
 DELTA 1.89999998 sec  
 MCREST 0.00000000 sec  
 MCKRK 0.01500000 sec

\*\*\*\*\* CHANNEL f1 \*\*\*\*\*  
 NUC1 13C  
 P1 8.00 usec  
 PL1 -6.00 dB  
 SF01 100.6238401 MHz

\*\*\*\*\* CHANNEL f2 \*\*\*\*\*  
 NUC2 1H  
 P1 100.00 usec  
 PL2 -6.00 dB  
 PL12 16.40 dB  
 PL13 18.40 dB  
 SF02 400.1316005 MHz

F2 - Processing parameters  
 SI 32768  
 SF 100.6127710 MHz  
 WDM EM  
 SSB 0  
 LB 2.00 Hz  
 GB 0  
 PC 1.40

1D NMR plot parameters  
 CX 32.00 cm  
 CY 45.00 cm  
 F1P 200.000 ppm  
 F1 20122.55 Hz  
 F2P -0.000 ppm  
 F2 -0.00 Hz  
 PPMCM 6.25000 ppm/cm  
 HZCM 628.82983 Hz/cm

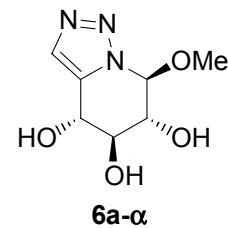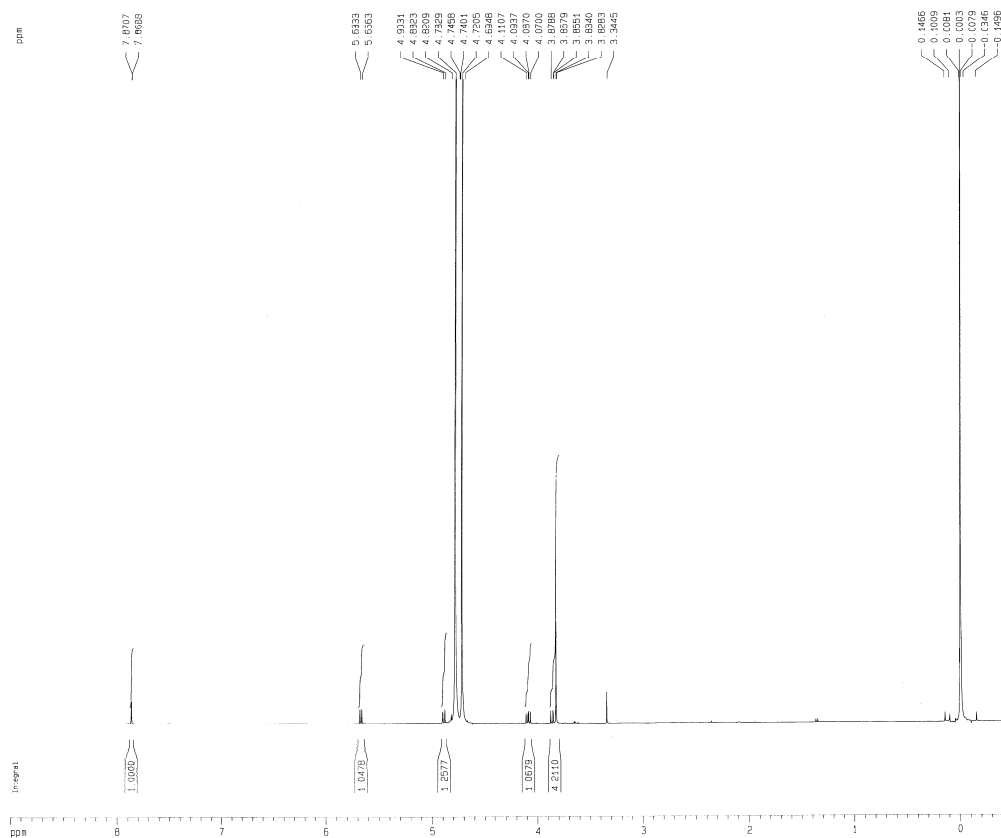

Current Data Parameters  
 NAME g1c-dh-less  
 EXPNO 3  
 PROCNO 1

F2 - Acquisition Parameters  
 Date\_ 20071228  
 Time 20.26  
 INSTRUM spect  
 PROBHD 5 mm QNP 1H/13  
 PULPROG zg30  
 TD 65536  
 SOLVENT CDCl3  
 NS 64  
 DS 2  
 SWH 8278.146 Hz  
 FIDRES 0.126314 Hz  
 AQ 3.9584243 sec  
 RG 64  
 DW 60.400 usec  
 DE 6.00 usec  
 TE 300.2 K  
 D1 1.00000000 sec  
 MCHREST 0.00000000 sec  
 MCMRK 0.01500000 sec

===== CHANNEL f1 =====  
 NUC1 1H  
 P1 11.50 usec  
 PL1 -4.00 dB  
 SFO1 400.0324703 MHz

F2 - Processing parameters  
 SI 32768  
 SF 400.0299640 MHz  
 MW EM  
 SSB 0  
 LB 0.30 Hz  
 GB 0  
 PC 1.00

1D NMR plot parameters  
 CX 32.00 cm  
 CY 50.00 cm  
 F1P 3.000 ppm  
 F1 3600.27 Hz  
 F2P -0.500 ppm  
 F2 -200.01 Hz  
 PRMCM 0.29588 ppm/cm  
 HZCM 118.75880 Hz/cm

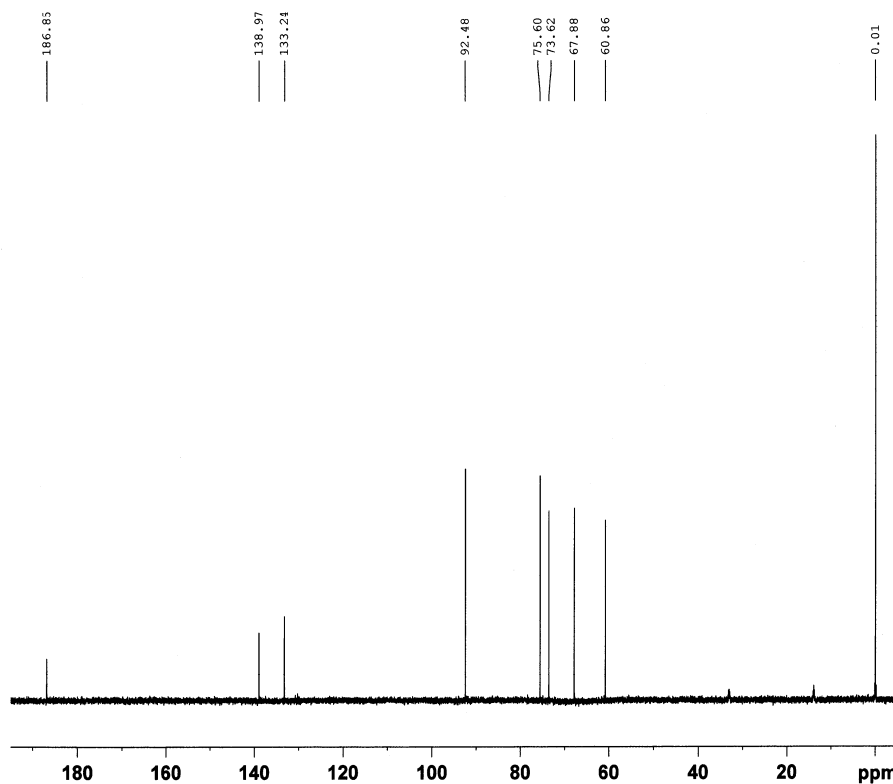

Current Data Parameters  
 NAME g1cchl  
 EXPNO 4  
 PROCNO 1

F2 - Acquisition Parameters  
 Date\_ 20071225  
 Time 10.13  
 INSTRUM AV600  
 PROBHD 5 mm CPTCI 1H-  
 PULPROG zgpg30  
 TD 65402  
 SOLVENT D2O  
 NS 256  
 DS 16  
 SWH 35971.223 Hz  
 FIDRES 0.5550002 Hz  
 AQ 0.9091517 sec  
 RG 9200  
 DW 13.900 usec  
 DE 6.00 usec  
 TE 300.0 K  
 D1 2.00000000 sec  
 d11 0.03000000 sec  
 DELTA 1.89999998 sec  
 TDO 1

===== CHANNEL f1 =====  
 NUC1 13C  
 P1 15.40 usec  
 PL1 -6.00 dB  
 SFO1 150.9194083 MHz

===== CHANNEL f2 =====  
 CPDPRG2 waltz16  
 NUC2 1H  
 PCPD2 80.00 usec  
 PL2 -5.40 dB  
 PL12 12.00 dB  
 PL13 12.00 dB  
 SFO2 600.1324005 MHz

F2 - Processing parameters  
 SI 32768  
 SF 150.9025026 MHz  
 WDW EM  
 SSB 0  
 LB 1.00 Hz  
 GB 0  
 PC 1.40

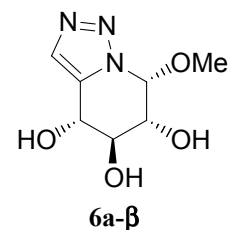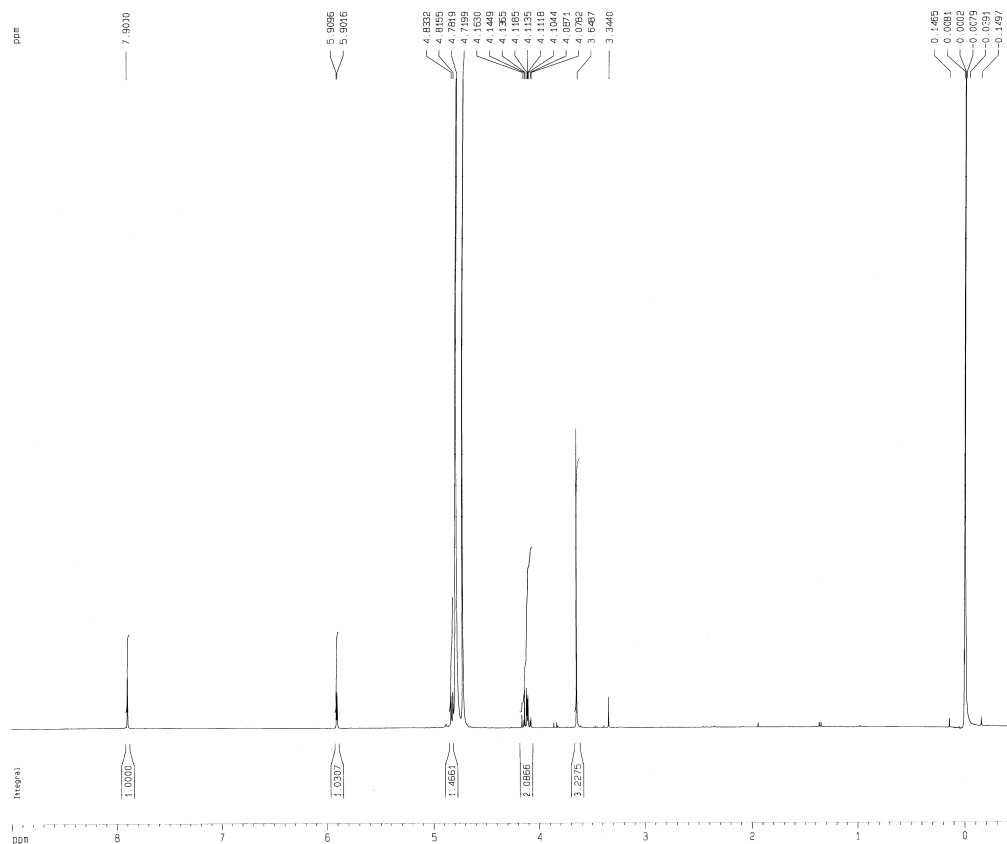

```

Current Data Parameters
NAME      Bic-DH-more
EXPNO    4
PROCNO   1

F2 - Acquisition Parameters
Date_    20071228
Time     21.27
INSTRUM  spect
PROBHD   5 mm QNP 1H/13
PULPROG  zgpg30
TD       65536
SOLVENT  CDCl3
NS       64
DS       2
SWH      8278.146 Hz
FIDRES   0.126314 Hz
AQ       3.9584243 sec
RG       71.0
DM       60.400 usec
DE       6.00 usec
TE       300.2 K
D1       1.00000000 sec
MCREST   0.00000000 sec
MCWRR    0.01500000 sec

===== CHANNEL f1 =====
NUC1     1H
P1       11.50 usec
PL1      -4.00 dB
SFO1     400.0324703 MHz

F2 - Processing parameters
SI       32768
SF       400.0299645 MHz
WDW      EM
SSB      0
LB       0.30 Hz
GB       0
PC       1.00

1D NMR plot parameters
CX       32.00 cm
CY       50.00 cm
F1P      9.000 pph
F1       360.20 Hz
F2P      -0.500 ppm
F2       -200.01 Hz
PPMCM    0.29666 ppm/cm
HZCM     118.75890 Hz/cm
    
```

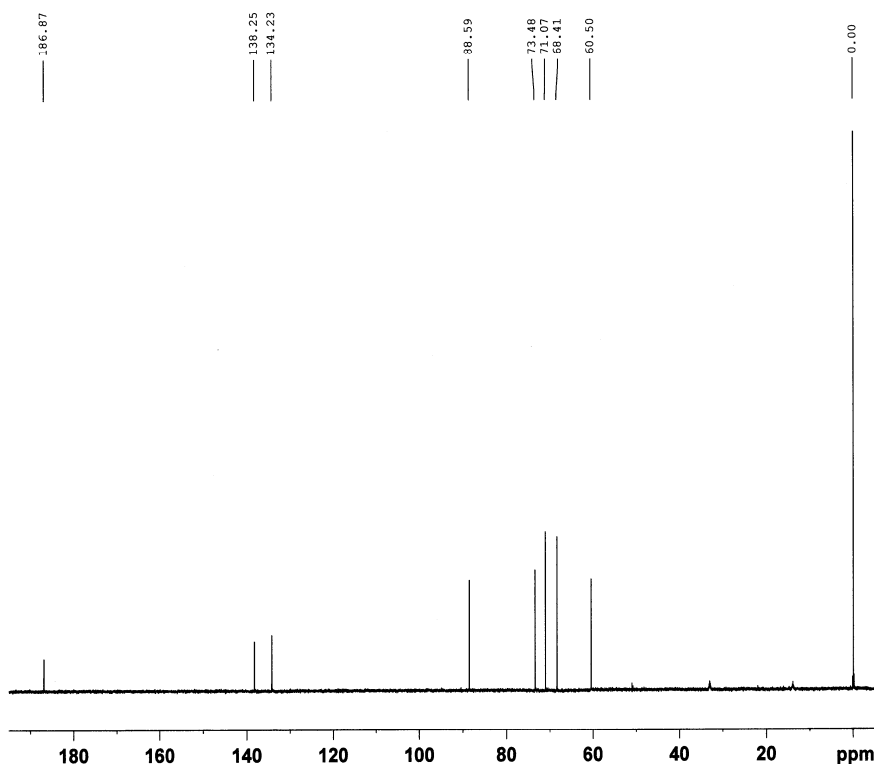

```

Current Data Parameters
NAME      glicohm
EXPNO    4
PROCNO   1

F2 - Acquisition Parameters
Date_    20071225
Time     9.29
INSTRUM  AV600
PROBHD   5 mm CPTCI 1H-
PULPROG  zgpg30
TD       65402
SOLVENT  D2O
NS       288
DS       16
SWH      35971.223 Hz
FIDRES   0.550002 Hz
AQ       0.9091517 sec
RG       9200
DM       13.900 usec
DE       6.00 usec
TE       300.0 K
D1       2.00000000 sec
d11      0.03000000 sec
DELTA    1.899999998 sec
TD0      1

===== CHANNEL f1 =====
NUC1     13C
P1       15.40 usec
PL1      -6.00 dB
SFO1     150.9194083 MHz

===== CHANNEL f2 =====
CPDPRG2  waltz16
NUC2     1H
PCPD2    80.00 usec
PL2      -5.40 dB
PL12     12.00 dB
PL13     12.00 dB
SFO2     600.1324005 MHz

F2 - Processing parameters
SI       32768
SF       150.9025026 MHz
WDW      EM
SSB      0
LB       1.00 Hz
GB       0
PC       1.40
    
```

6. <sup>1</sup>H and <sup>13</sup>C NMR spectra of **7a**, **8a** and **9a**

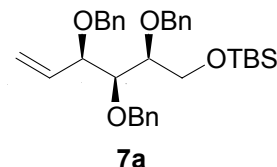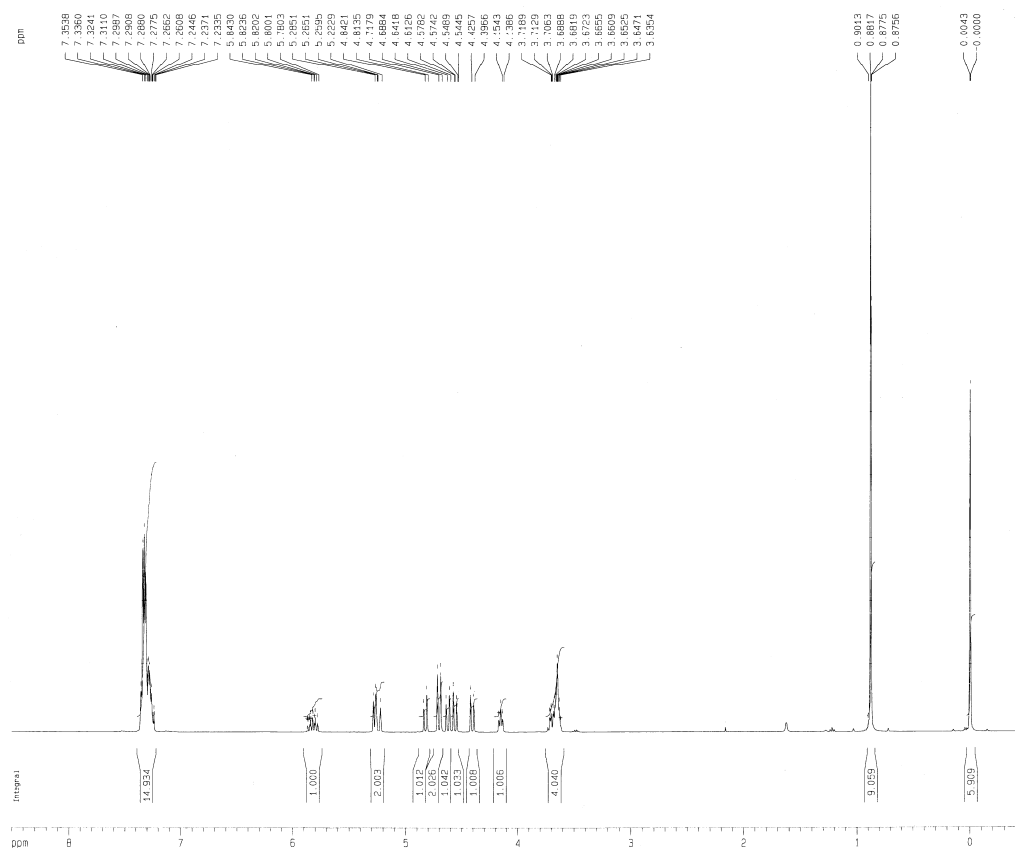

Current Data Parameters  
NAME 43C2-10a  
EXPNO 1  
PROCNO 1

F2 - Acquisition Parameters  
Date\_ 20070713  
Time 20.55  
INSTRUM spect  
PROBHD 5 mm QNP 1H/13  
PULPROG zgpg30  
TD 65536  
SOLVENT CDCl3  
NS 32  
DS 2  
SWH 6793.478 Hz  
FIDRES 0.207320 Hz  
AQ 2.4117749 sec  
RG 655  
DM 73.600 usec  
DE 6.00 usec  
TE 300.2 K  
D1 1.00000000 sec  
MCREST 0.00000000 sec  
MCWK 0.01500000 sec

===== CHANNEL f1 =====  
NUC1 13C  
P1 7.40 usec  
PL1 -6.00 dB  
SFO1 400.1326354 MHz

F2 - Processing parameters  
SI 16384  
SF 400.1300150 MHz  
WDW EM  
SSB 0  
LB 0.30 Hz  
GB 0  
PC 1.00

1D NMR plot parameters  
CX 32.00 cm  
CY 21.00 cm  
F1P 8.500 ppm  
F1 3401.10 Hz  
F2P -0.500 ppm  
F2 -200.06 Hz  
PPMCM 0.28125 ppm/cm  
HZCM 112.53656 Hz/cm

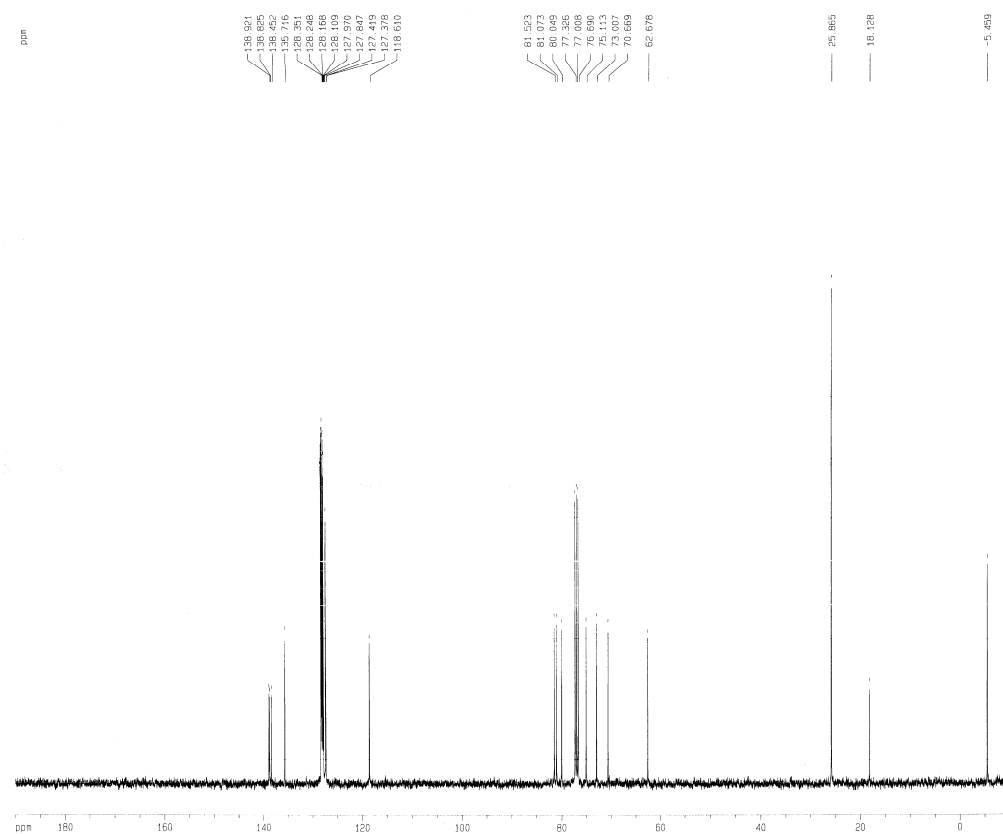

Current Data Parameters  
NAME 43C2-10a  
EXPNO 2  
PROCNO 1

F2 - Acquisition Parameters  
Date\_ 20070713  
Time 21.02  
INSTRUM spect  
PROBHD 5 mm QNP 1H/13  
PULPROG zgpg30  
TD 65536  
SOLVENT CDCl3  
NS 104  
DS 2  
SWH 26178.010 Hz  
FIDRES 0.293445 Hz  
AQ 1.2517675 sec  
RG 16384  
DM 19.100 usec  
DE 6.00 usec  
TE 301.2 K  
D1 2.00000000 sec  
d11 0.03000000 sec  
d11A 1.00000000 sec  
MCREST 0.00000000 sec  
MCWK 0.01500000 sec

===== CHANNEL f1 =====  
NUC1 13C  
P1 8.00 usec  
PL1 -6.00 dB  
SFO1 100.6284601 MHz

===== CHANNEL f2 =====  
CPDPRG2 waltz16  
NUC2 1H  
P2P2 100.00 usec  
PL2 -6.00 dB  
PL12 16.40 dB  
PL13 16.40 dB  
SFO2 400.1316005 MHz

F2 - Processing parameters  
SI 32768  
SF 100.6127774 MHz  
WDW EM  
SSB 0  
LB 2.00 Hz  
GB 0  
PC 1.40

1D NMR plot parameters  
CX 32.00 cm  
CY 16.00 cm  
F1P 190.000 ppm  
F1 19116.43 Hz  
F2P -10.000 ppm  
F2 -1006.13 Hz  
PPMCM 6.25000 ppm/cm  
HZCM 628.82990 Hz/cm



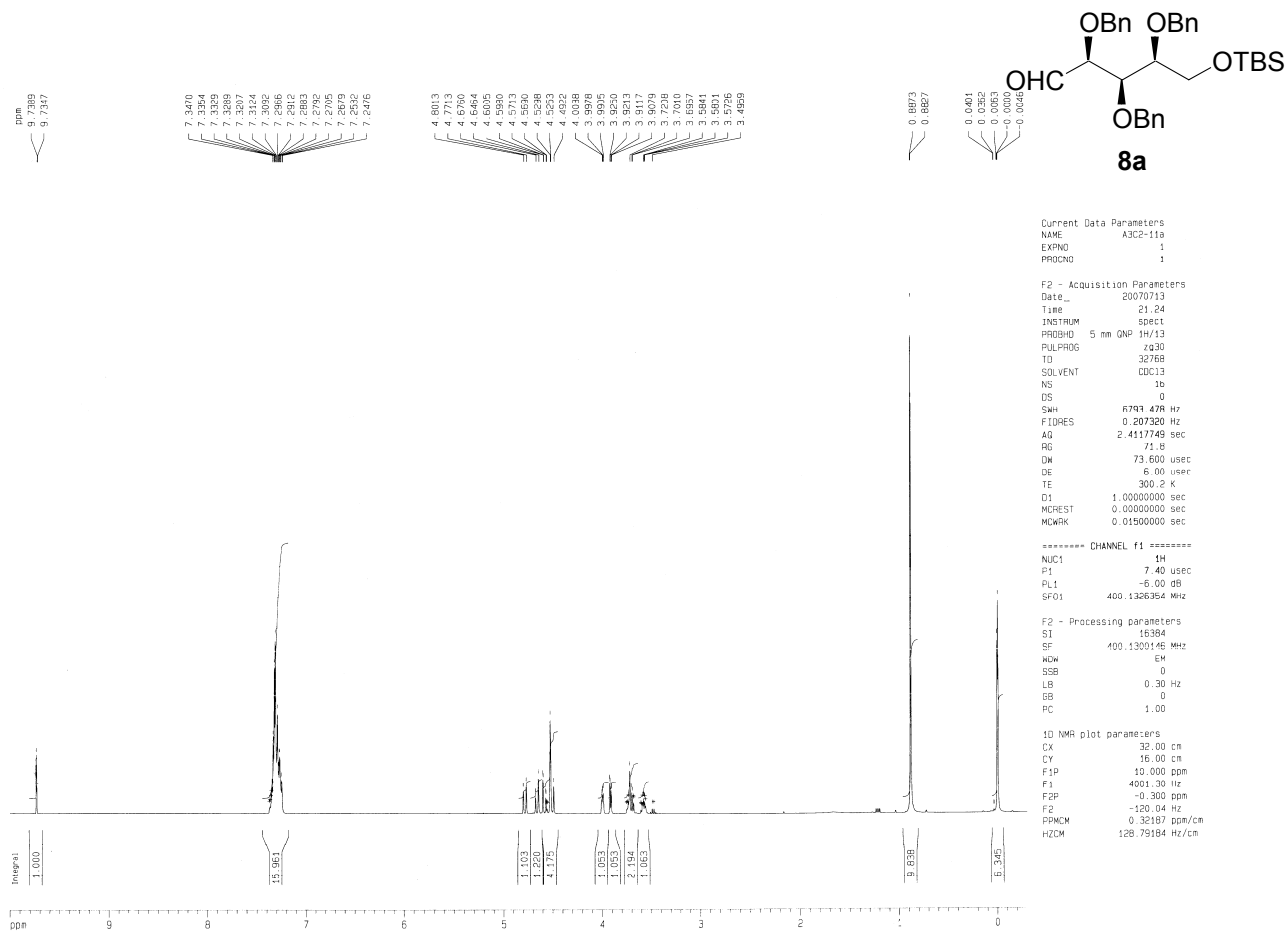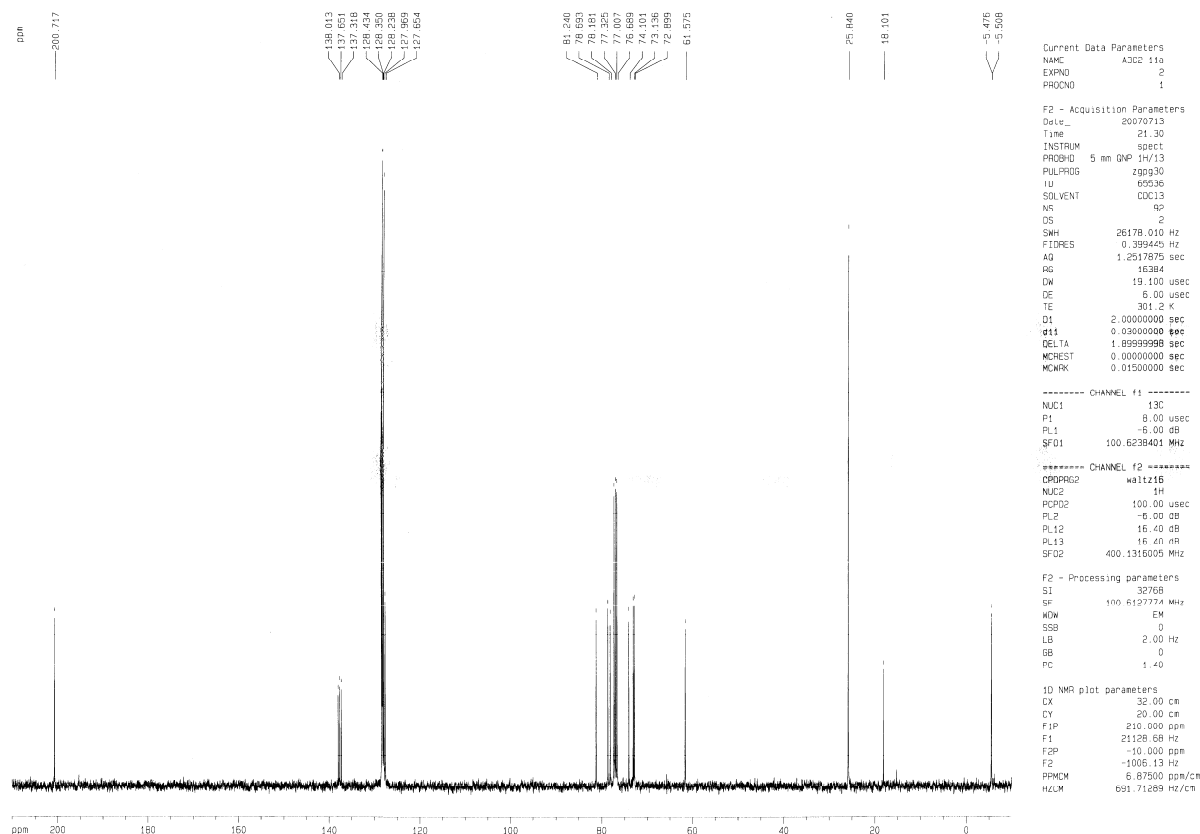

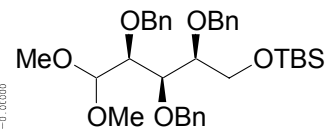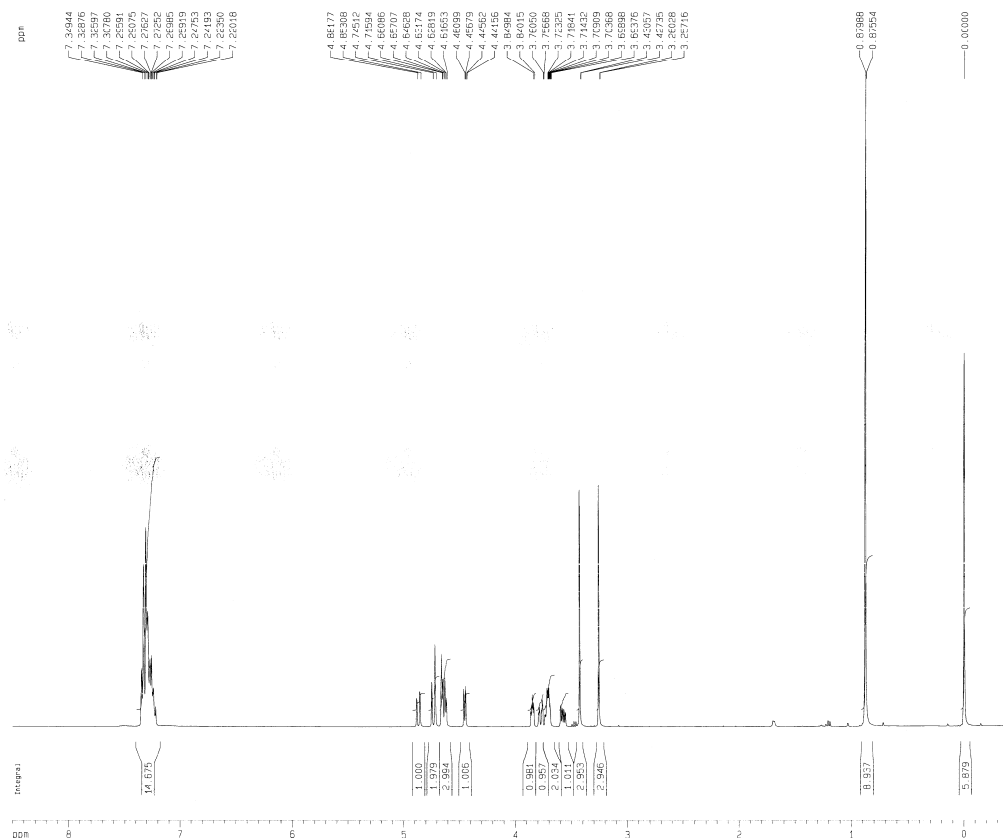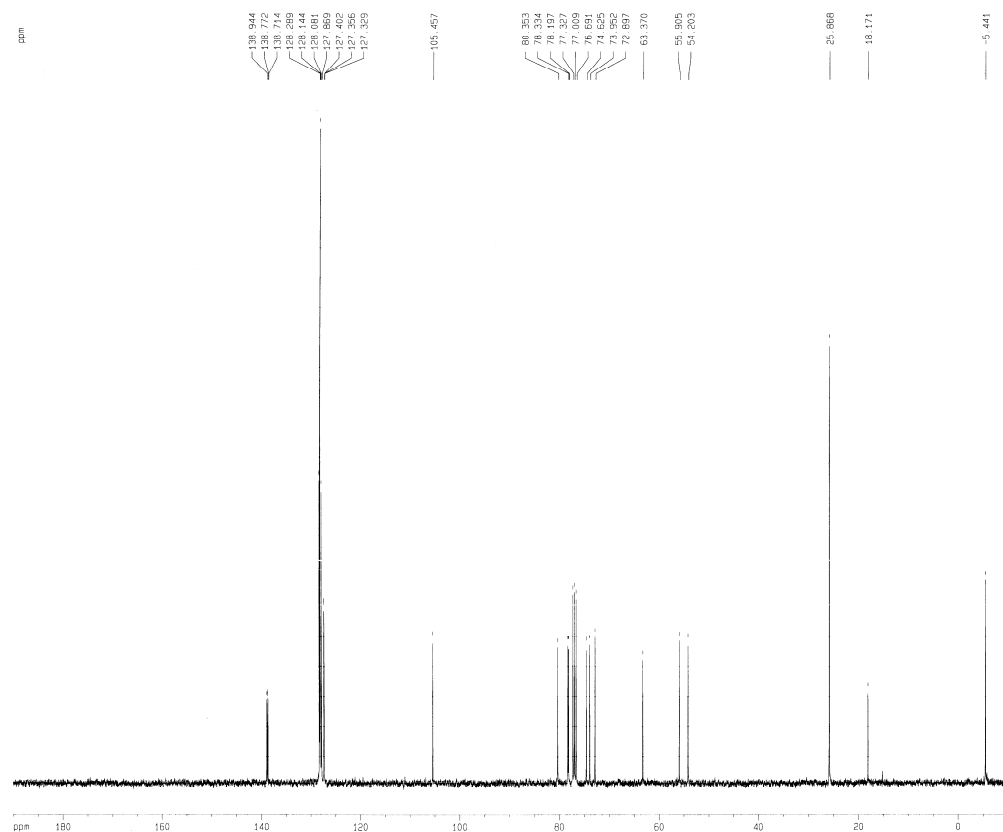

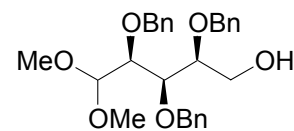

**9a**

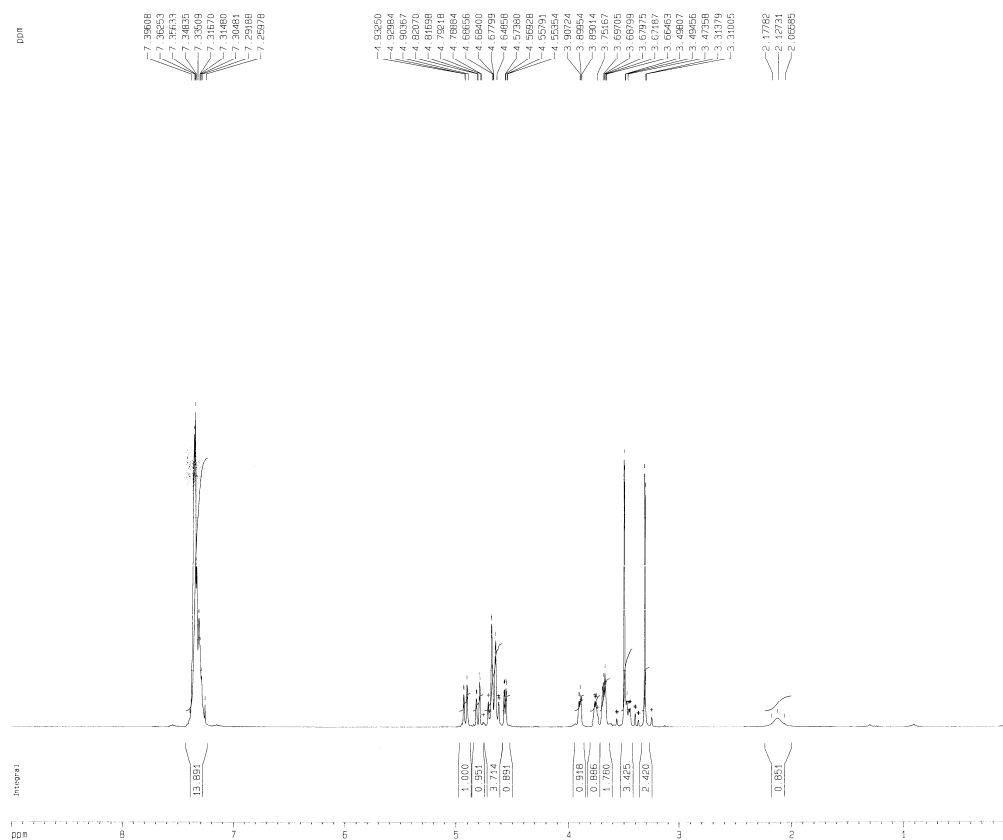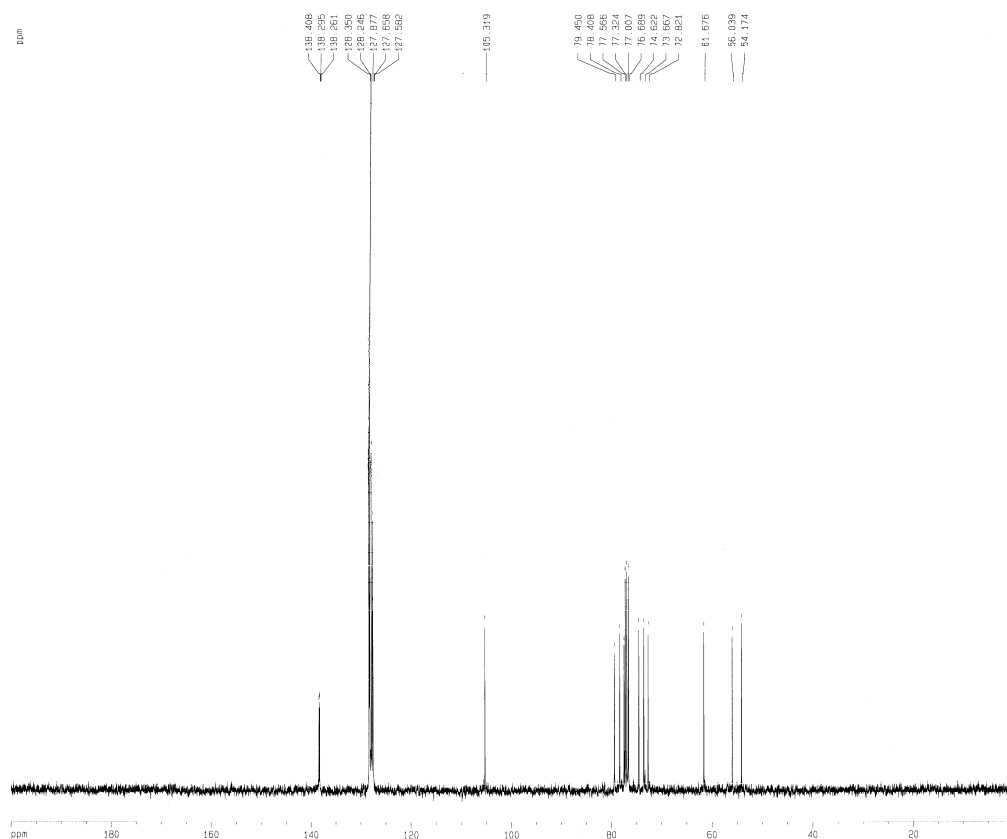

7. <sup>1</sup>H and <sup>13</sup>C NMR spectra of **2b**, **3b**, **4b**, **5b** and **6b**

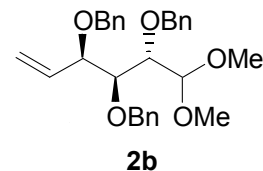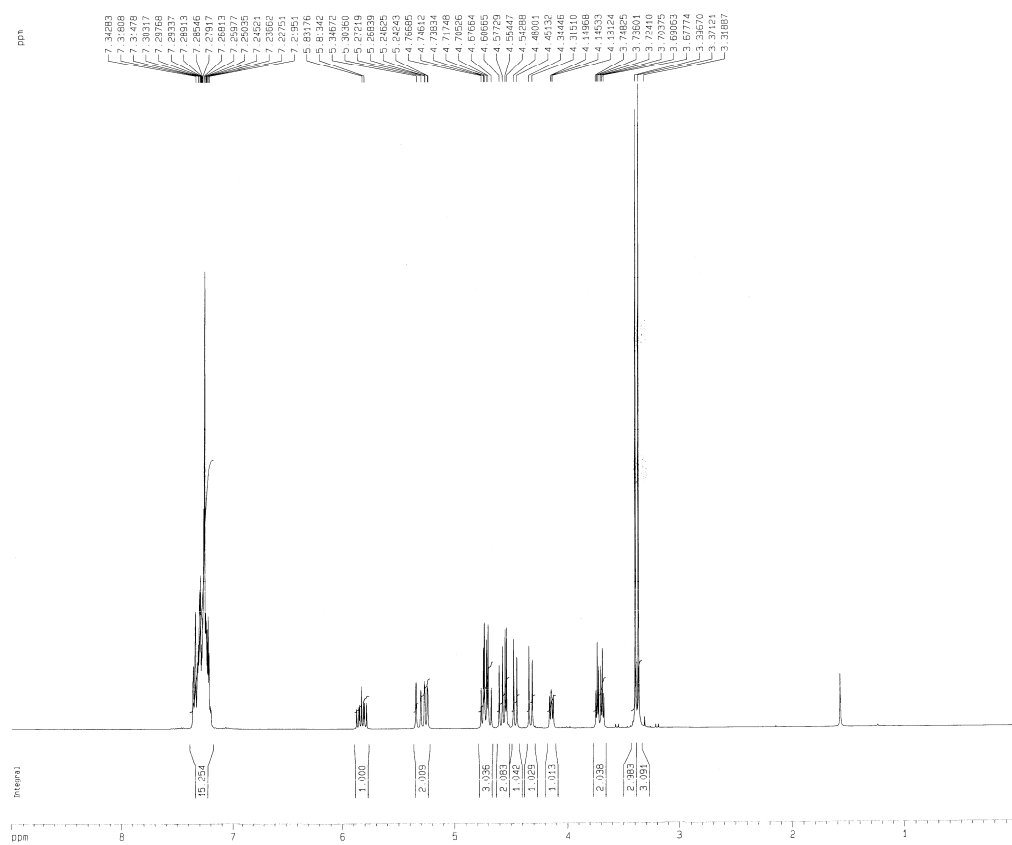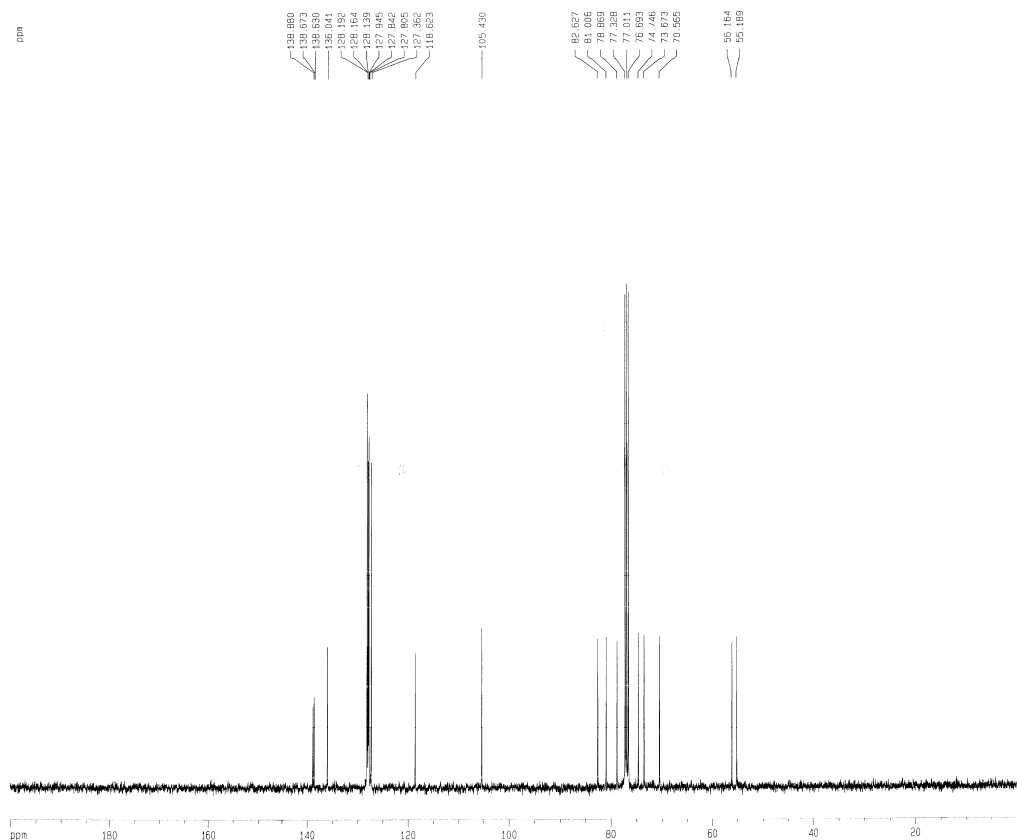

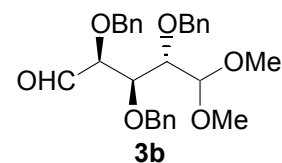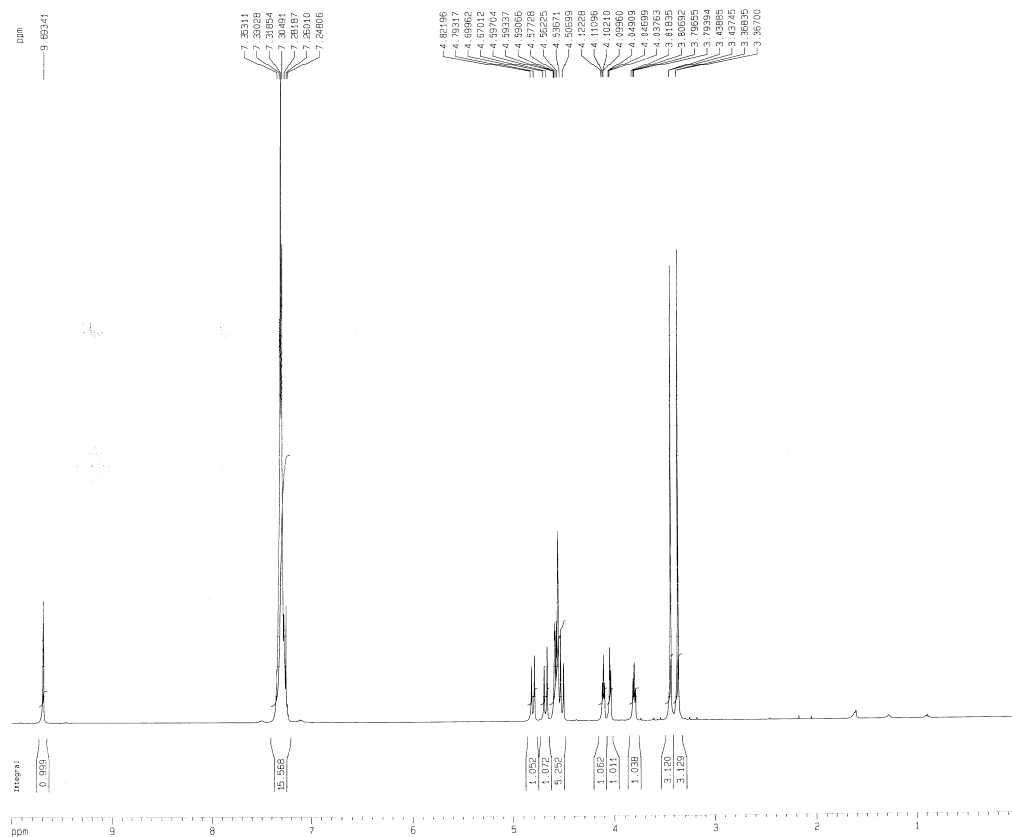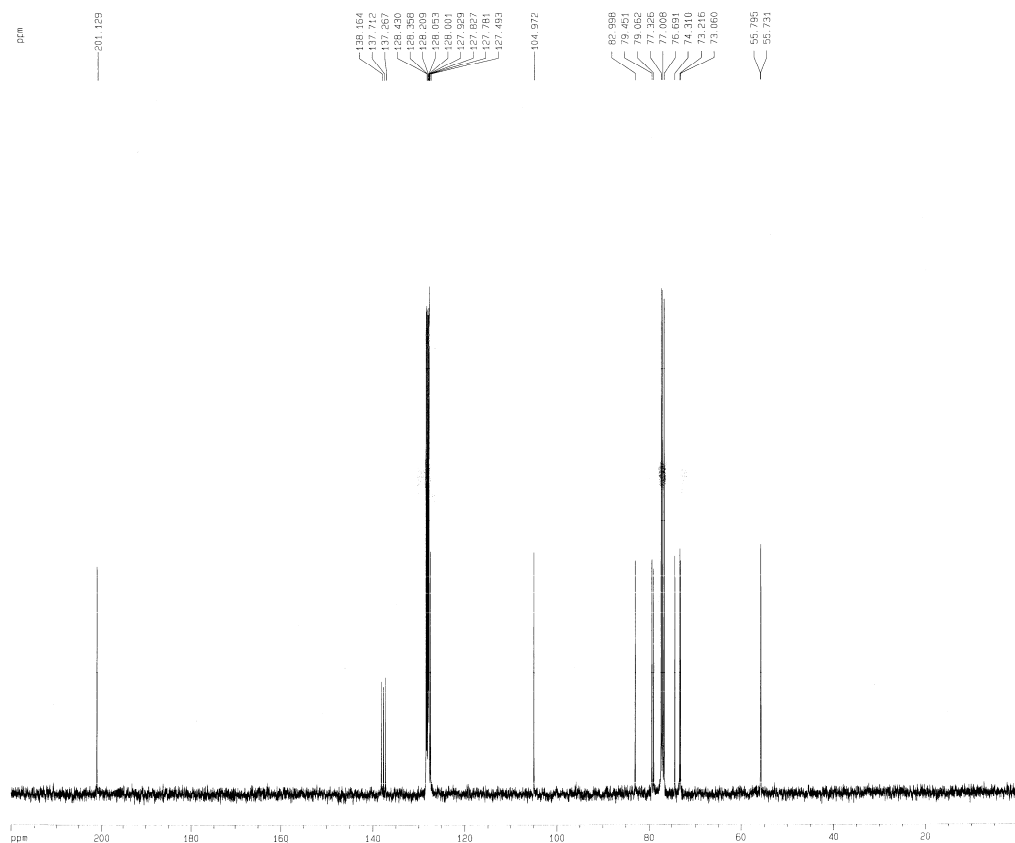

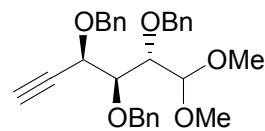

**4b**

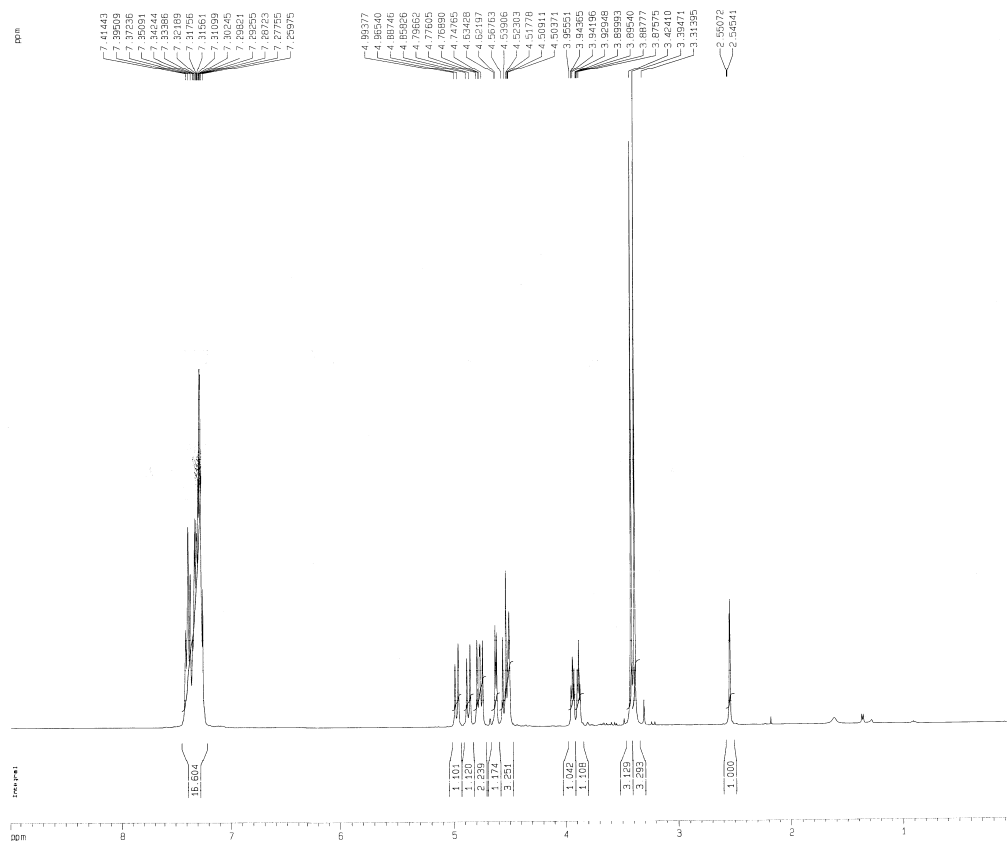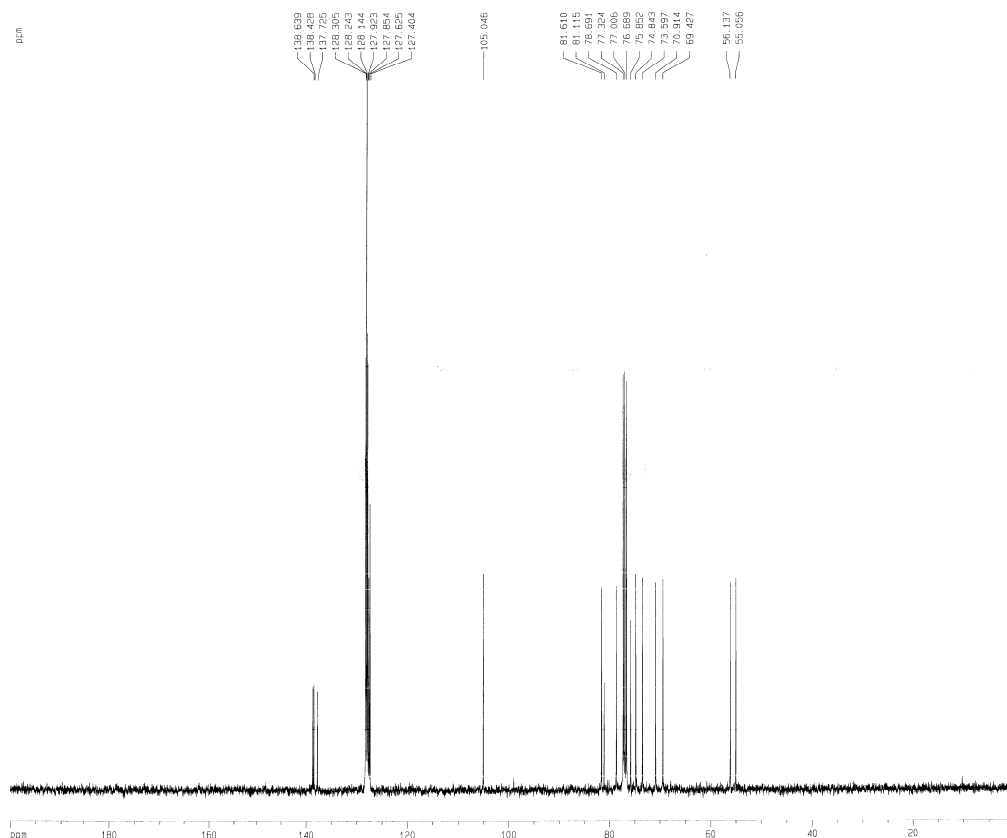

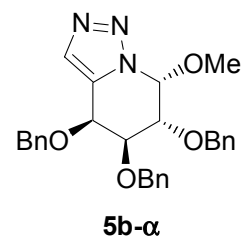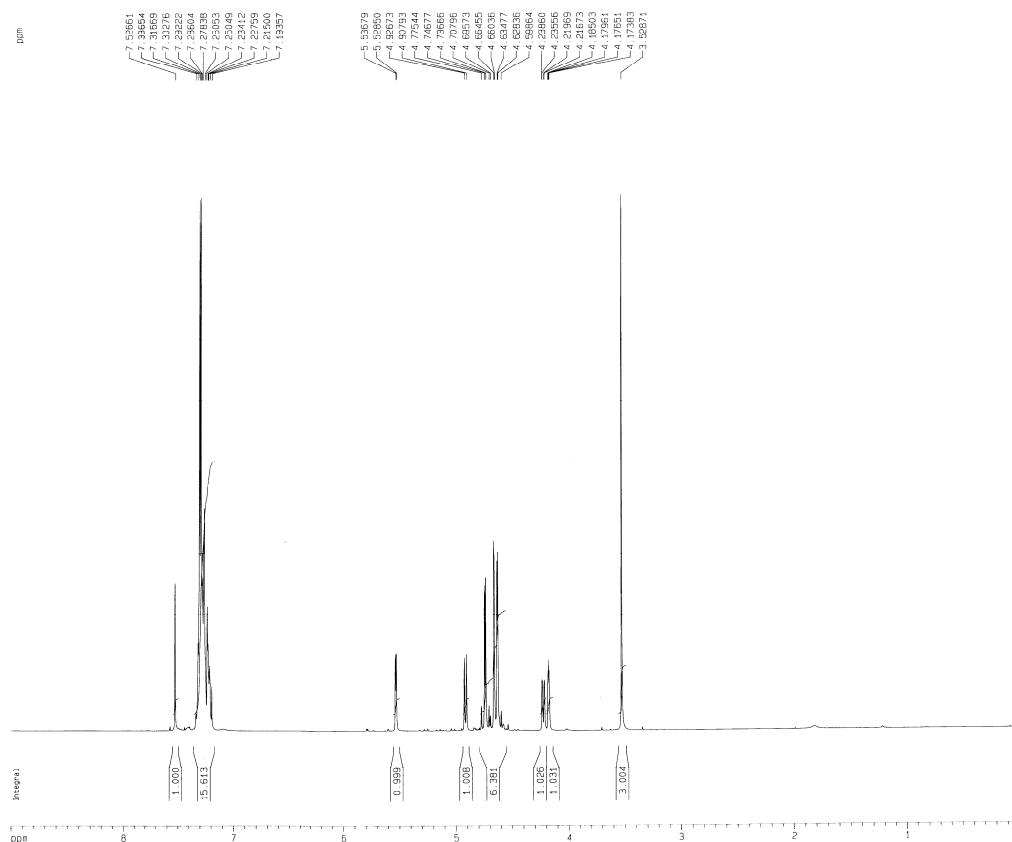

Current Data Parameters  
NAME M9-less  
EXPNO 1  
PROCNO 1

F2 - Acquisition Parameters  
Date\_ 20071006  
Time 15.52  
INSTRUM spect  
PROBHD 5 mm QNP 1H/13  
PULPROG zg30  
TD 65536  
SOLVENT CDCl3  
NS 16  
DS 2  
SWH 8278.146 Hz  
FIDRES 0.126314 Hz  
AQ 3.9584243 sec  
RG 40.3  
DM 60.400 usec  
DE 6.00 usec  
TE 298.2 K  
D1 1.00000000 sec  
MCREST 0.00000000 sec  
MCWRK 0.01500000 sec

----- CHANNEL f1 -----  
NUC1 1H  
P1 11.50 usec  
PL1 -4.00 dB  
SFO1 400.0324703 MHz

F2 - Processing parameters  
SI 32768  
SF 400.0300330 MHz  
WDW EM  
SSB 0  
LB 0.30 Hz  
GB 0  
PC 1.00

1D NMR plot parameters  
CX 32.00 cm  
CY 17.00 cm  
F1P 9.000 ppm  
F1 3600.27 Hz  
F2P 0.000 ppm  
F2 0.00 Hz  
PRCM 0.29125 ppm/cm  
HZCM 112.50845 Hz/cm

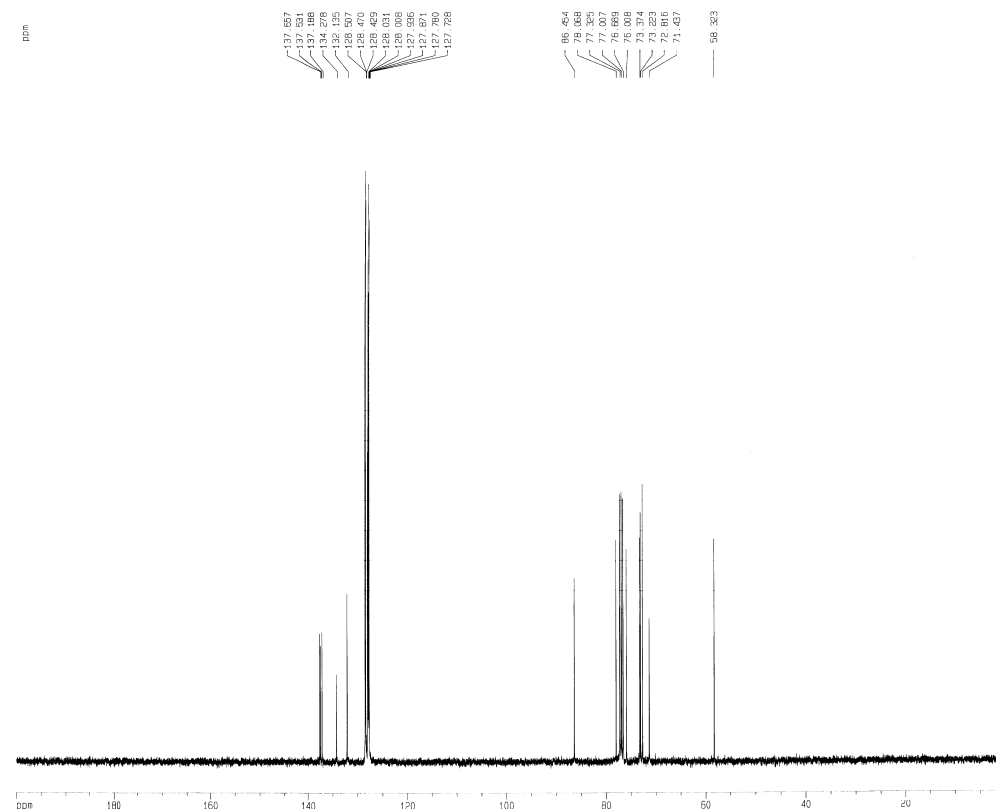

Current Data Parameters  
NAME M9-less  
EXPNO 2  
PROCNO 1

F2 - Acquisition Parameters  
Date\_ 20071006  
Time 16.09  
INSTRUM spect  
PROBHD 5 mm QNP 1H/13  
PULPROG zgpg30  
TD 65536  
SOLVENT CDCl3  
NS 256  
DS 4  
SWH 26178.010 Hz  
FIDRES 0.399445 Hz  
AQ 1.2517875 sec  
RG 8192  
DM 15.100 usec  
DE 6.00 usec  
TE 298.2 K  
D1 2.00000000 sec  
d11 0.03000000 sec  
DELTA 1.89299998 sec  
MCREST 0.00000000 sec  
MCWRK 0.01500000 sec

----- CHANNEL f1 -----  
NUC1 13C  
P1 10.00 usec  
PL1 -3.50 dB  
SFO1 100.5986886 MHz

===== CHANNEL f2 =====  
CHPROG2 waltz16  
NUC2 1H  
PCPD2 100.00 usec  
PL2 -4.00 dB  
PL12 17.00 dB  
PL13 17.00 dB  
SFO2 400.0316001 MHz

F2 - Processing parameters  
SI 32768  
SF 100.6267034 MHz  
WDW EM  
SSB 0  
LB 1.00 Hz  
GB 0  
PC 1.40

1D NMR plot parameters  
CX 32.00 cm  
CY 15.00 cm  
F1P 200.000 ppm  
F1 20117.53 Hz  
F2P -0.000 ppm  
F2 -0.00 Hz  
PRCM 6.25000 ppm/cm  
HZCM 628.67273 Hz/cm

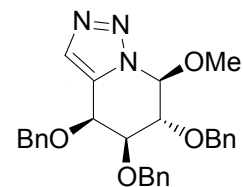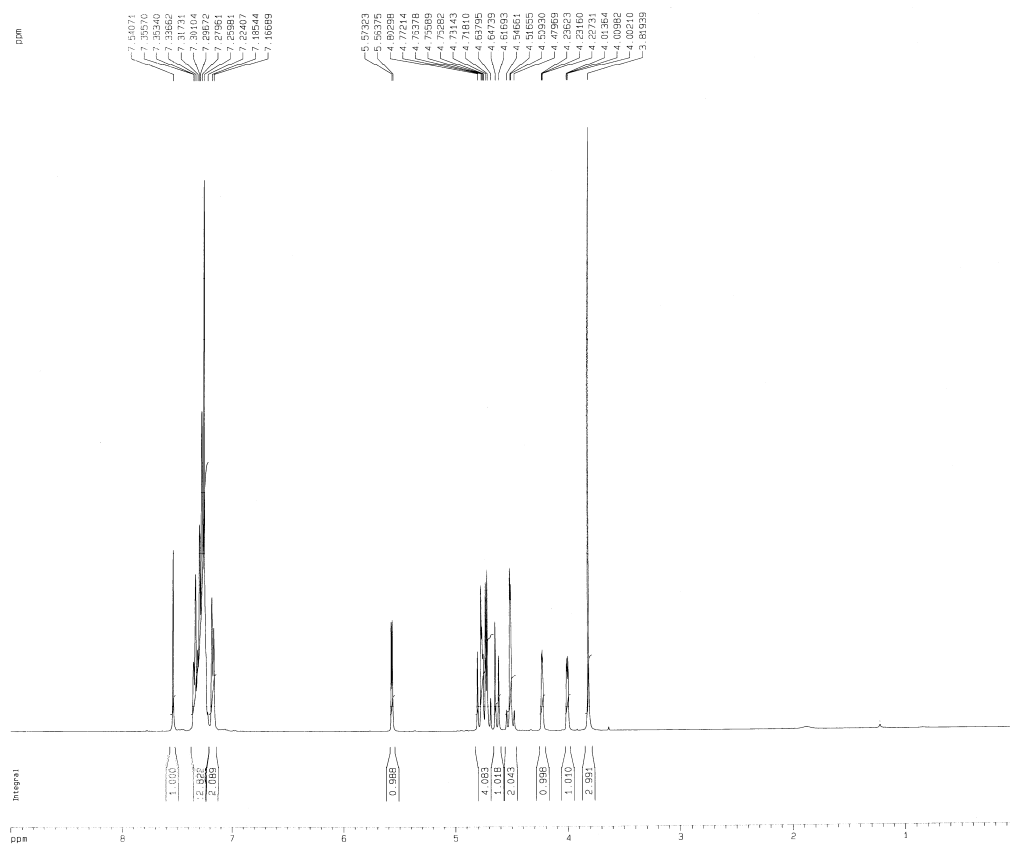

Current Data Parameters  
 NAME M9-more  
 EXPNO 1  
 PROCNO 1

F2 - Acquisition Parameters  
 Date\_ 20071006  
 Time 14.53  
 INSTRUM spect  
 PROUID 5 mm UNP 1H/13  
 PULPROG zg30  
 ID 65536  
 SOLVENT CDCl3  
 NS 16  
 DS 2  
 SWH 8278.146 Hz  
 FIDRES 0.126314 Hz  
 AQ 3.3584243 sec  
 RG 40.3  
 DM 60.400 usec  
 DE 6.00 usec  
 TE 298.2 K  
 O1 1.00000000 sec  
 MCREST 0.00000000 sec  
 MCWRK 0.01500000 sec

===== CHANNEL f1 =====  
 NUC1 1H  
 P1 11.50 usec  
 PL1 -4.00 dB  
 SFO1 400.0324703 MHz

F2 - Processing parameters  
 SI 32768  
 SF 400.0300345 MHz  
 WDM EM  
 SSB 0  
 LB 0.30 Hz  
 GB 0  
 PC 1.00

1D NMR plot parameters  
 CX 32.00 cm  
 CY 15.00 cm  
 FIP 9.000 ppm  
 F1 3600.27 Hz  
 F2P 0.000 ppm  
 F2 -0.00 Hz  
 PRMCM 0.28125 ppm/cm  
 HZCM 112.50845 Hz/cm

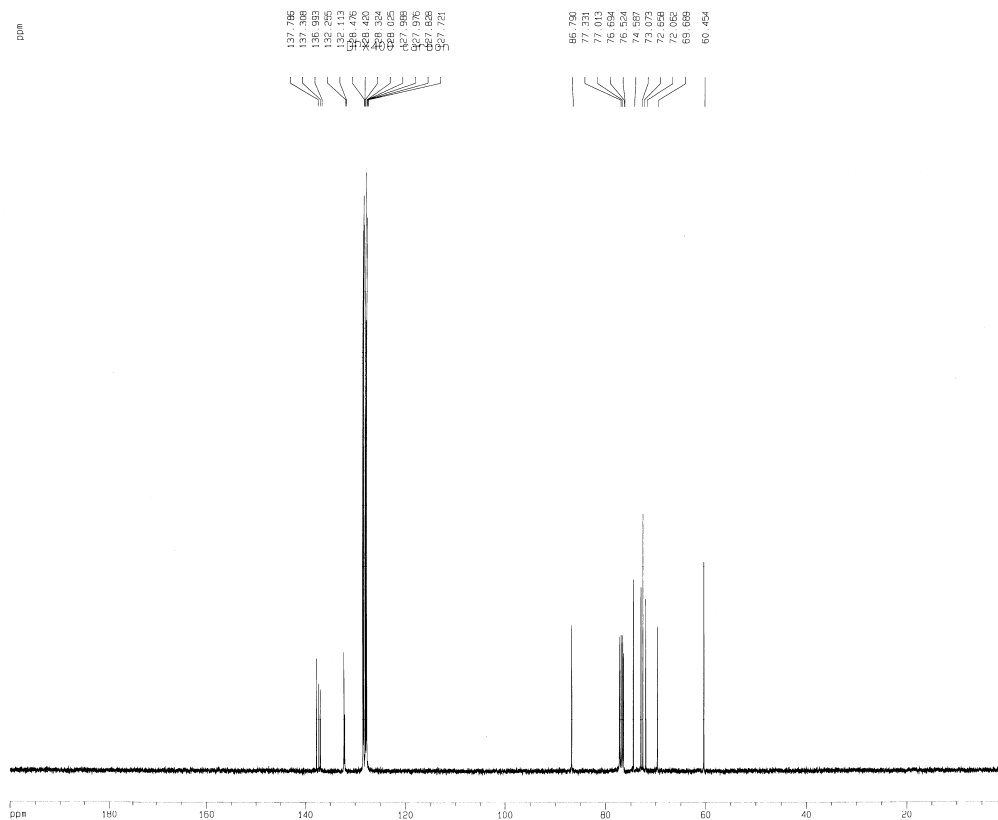

Current Data Parameters  
 NAME M9-more  
 EXPNO 2  
 PROCNO 1

F2 - Acquisition Parameters  
 Date\_ 20071006  
 Time 15.02  
 INSTRUM spect  
 PROUID 5 mm UNP 1H/13  
 PULPROG zgpg30  
 ID 65536  
 SOLVENT CDCl3  
 NS 256  
 DS 2  
 SWH 26178.010 Hz  
 FIDRES 0.399445 Hz  
 AQ 1.2517875 sec  
 RG 8192  
 DM 14.100 usec  
 DE 6.00 usec  
 TE 298.2 K  
 O1 2.00000000 sec  
 O11 0.03000000 sec  
 DELTA 1.89999998 sec  
 MCREST 0.00000000 sec  
 MCWRK 0.01500000 sec

===== CHANNEL f1 =====  
 NUC1 13C  
 P1 10.00 usec  
 PL1 -3.50 dB  
 SFO1 100.5906006 MHz

===== CHANNEL f2 =====  
 CPDPRG2 waltz16  
 NUC2 1H  
 P2 100.00 usec  
 PL2 -4.00 dB  
 PL12 17.00 dB  
 PL13 17.00 dB  
 SFO2 400.0316001 MHz

F2 - Processing parameters  
 SI 32768  
 SF 100.5876362 MHz  
 WDM EM  
 SSB 0  
 LB 1.00 Hz  
 GB 0  
 PC 1.40

1D NMR plot parameters  
 CX 32.00 cm  
 CY 15.00 cm  
 FIP 200.000 ppm  
 F1 20117.53 Hz  
 F2P -0.000 ppm  
 F2 -0.00 Hz  
 PRMCM 6.25000 ppm/cm  
 HZCM 620.67273 Hz/cm



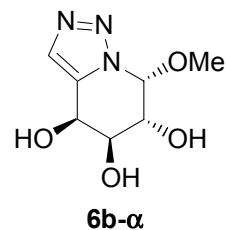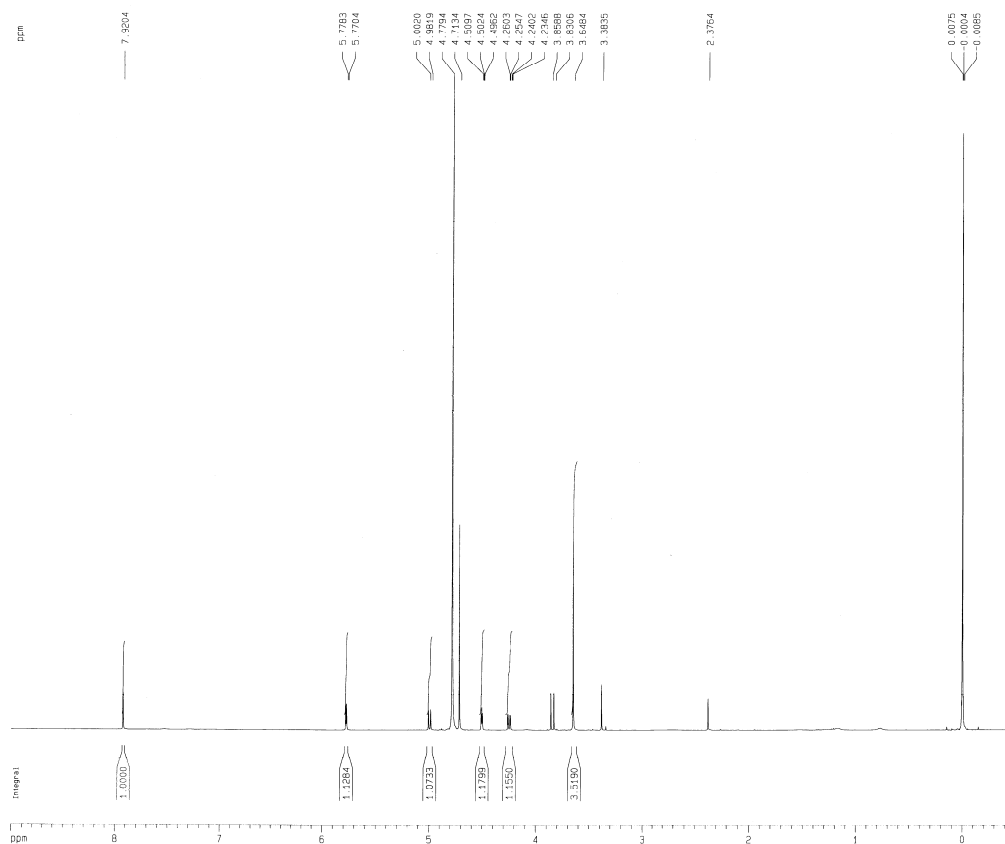

Current Data Parameters  
NAME Man-OH-less  
EXPNO 1  
PROCNO 1

F2 - Acquisition Parameters  
Date\_ 20071109  
Time 20.12  
INSTRUM spect  
PROBHD 5 mm QNP 1H/13  
PULPROG zg30  
TD 65536  
SOLVENT CDCl3  
NS 32  
DS 2  
SWH 8278.148 Hz  
FIDRES 0.126314 Hz  
AQ 3.9584243 sec  
RG 71.8  
DM 60.400 usec  
DE 5.00 usec  
TE 300.2 K  
D1 1.00000000 sec  
MCREST 0.00000000 sec  
MCMRK 0.01500000 sec

----- CHANNEL f1 -----  
NUC1 1H  
P1 11.50 usec  
PL1 -4.00 dB  
SFO1 400.0324703 MHz

F2 - Processing parameters  
SI 32768  
SF 400.0299650 MHz  
WDW EM  
SSB 0  
LB 0.10 Hz  
GB 0  
PC 1.00

1D NMR plot parameters  
CX 32.00 cm  
CY 21.00 cm  
F1P 9.000 ppm  
F1 3500.27 Hz  
F2P -0.500 ppm  
F2 -200.01 Hz  
PMCM 0.29688 ppm/cm  
HZCM 119.75890 Hz/cm

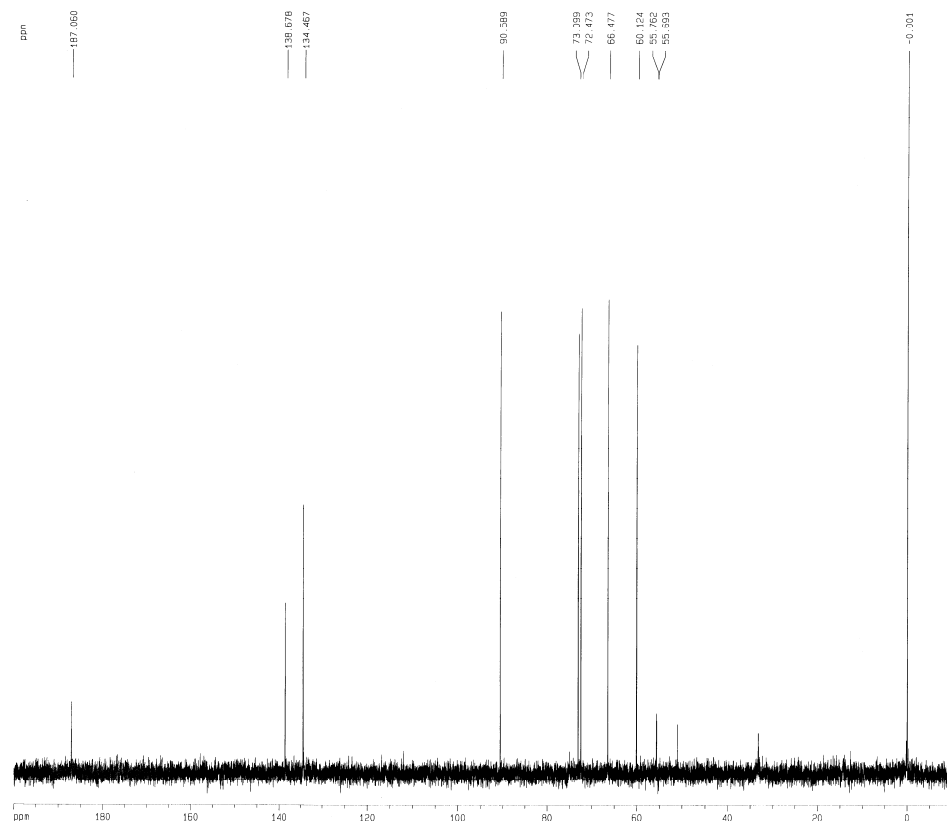

Current Data Parameters  
NAME Man-OH-less  
EXPNO 2  
PROCNO 1

F2 - Acquisition Parameters  
Date\_ 20071109  
Time 20.29  
INSTRUM spect  
PROBHD 5 mm QNP 1H/13  
PULPROG zgpg30  
TD 65536  
SOLVENT CDCl3  
NS 256  
DS 4  
SWH 26178.010 Hz  
FIDRES 0.389445 Hz  
AQ 1.2317075 sec  
RG 4096  
DM 19.100 usec  
DE 6.00 usec  
TE 300.2 K  
D1 2.00000000 sec  
d11 0.03000000 sec  
DELTA 1.89999996 sec  
MCREST 0.00000000 sec  
MCMRK 0.01500000 sec

----- CHANNEL f1 -----  
NUC1 13C  
P1 10.00 usec  
PL1 -3.50 dB  
SFO1 100.6281000 MHz

----- CHANNEL f2 -----  
CPDPRG2 waltz16  
NUC2 1H  
PCPD2 100.00 usec  
PL2 -4.00 dB  
PL12 17.00 dB  
PL13 17.00 dB  
SFO2 400.0316001 MHz

F2 - Processing parameters  
SI 32768  
SF 100.6274163 MHz  
WDW EM  
SSB 0  
LB 1.00 Hz  
GB 0  
PC 1.40

1D NMR plot parameters  
CX 30.00 cm  
CY 15.00 cm  
F1P 200.000 ppm  
F1 201.45 Hz  
F2P -10.000 ppm  
F2 -1005.87 Hz  
PMCM 7.00000 ppm/cm  
HZCM 704.11185 Hz/cm

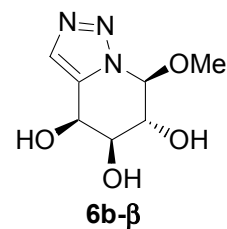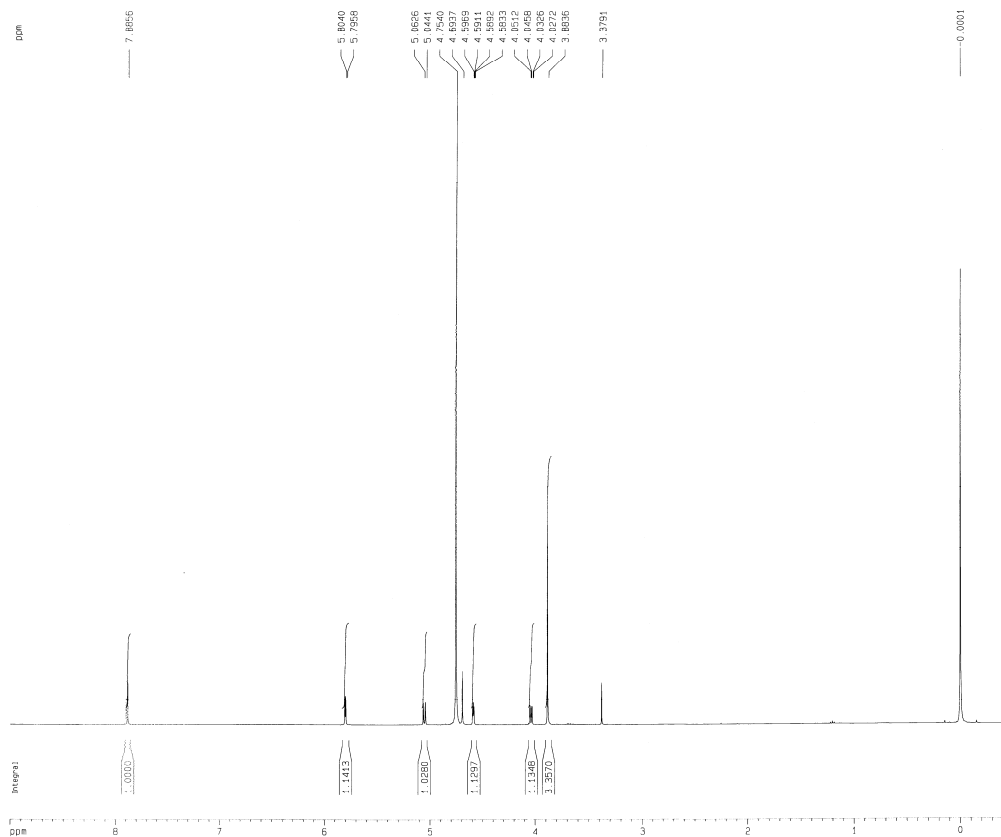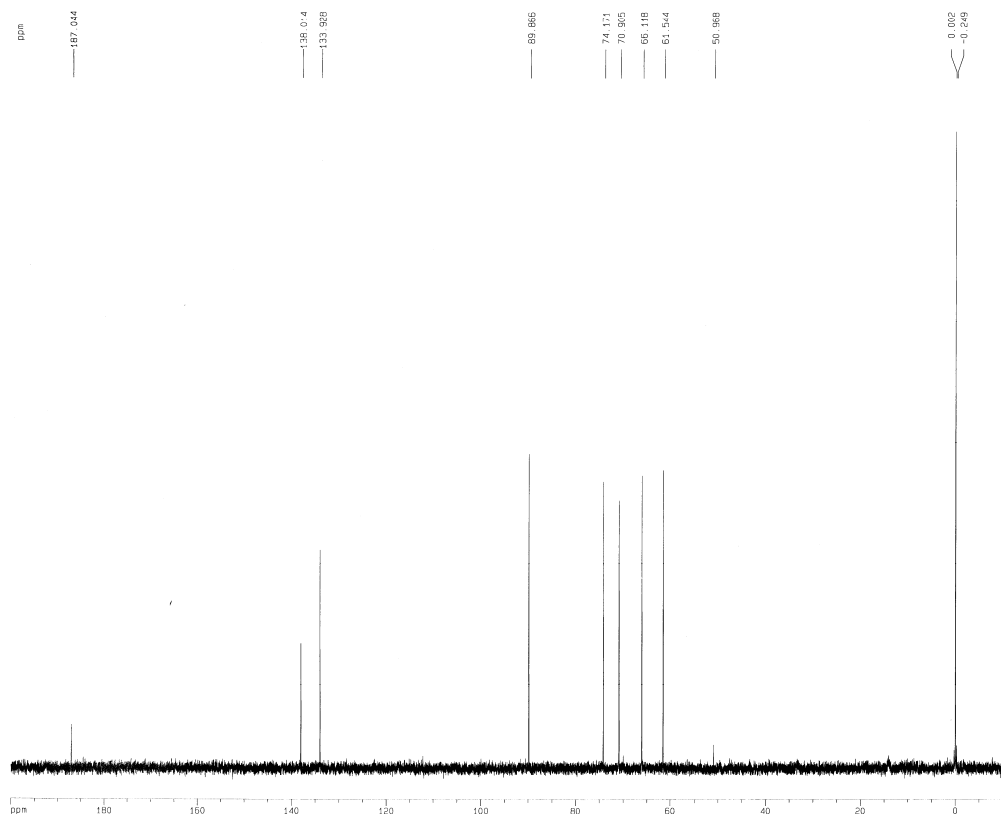

8. <sup>1</sup>H and <sup>13</sup>C NMR spectra of 2c, 3c, 4c, 5c and 6c

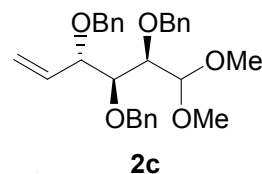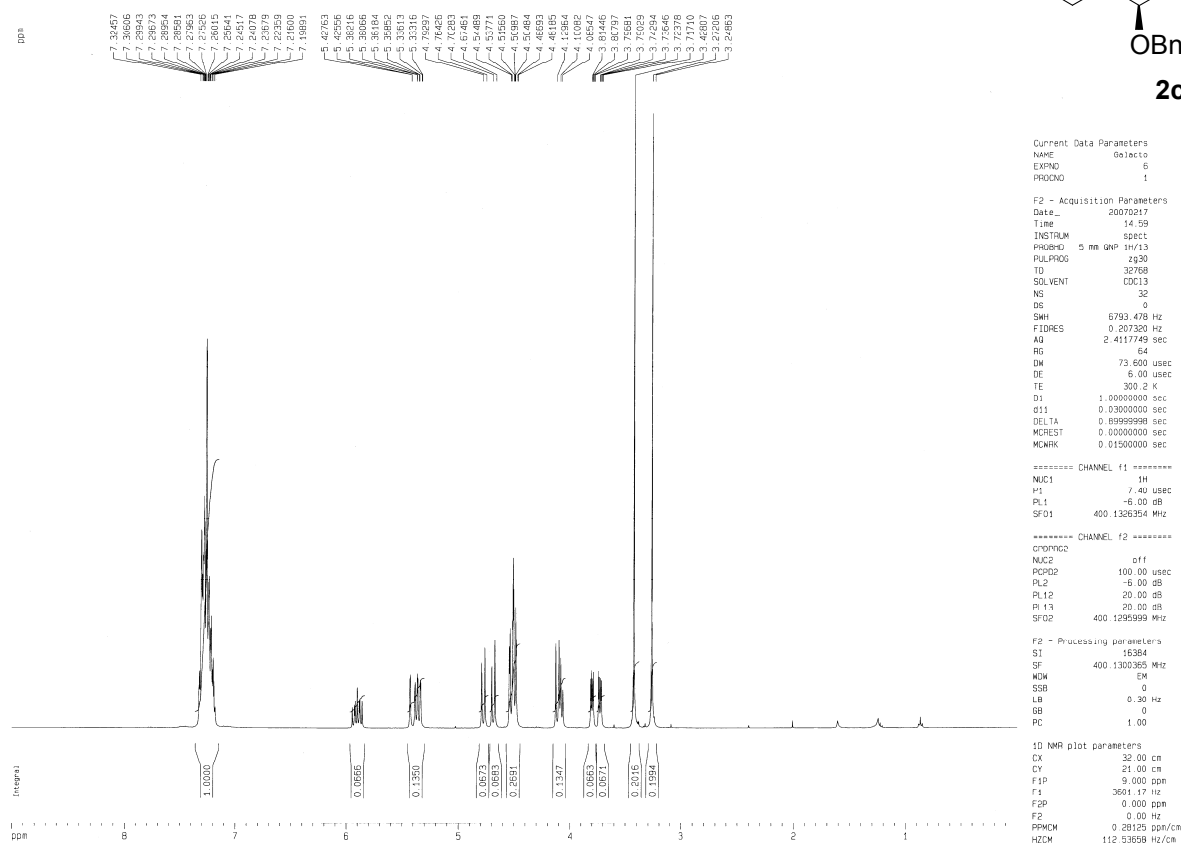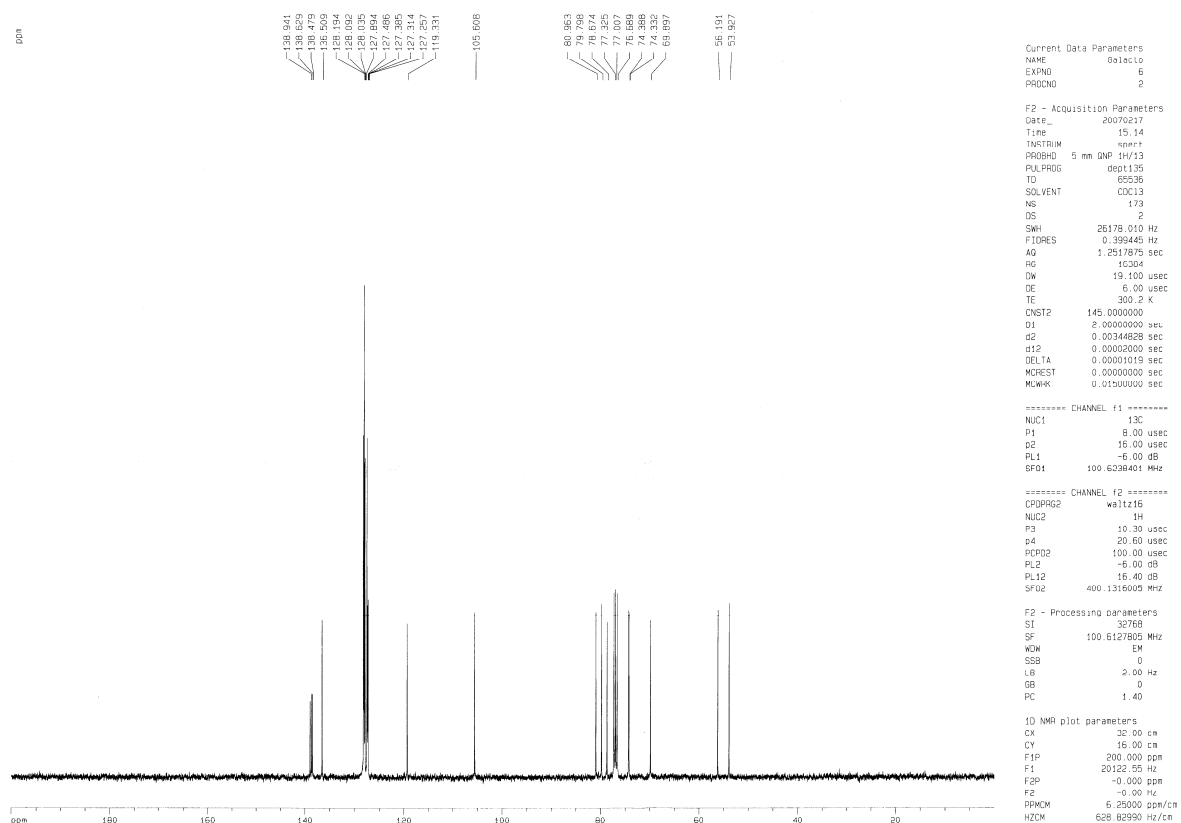

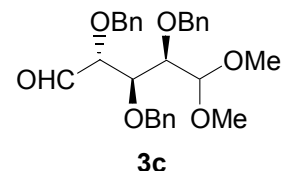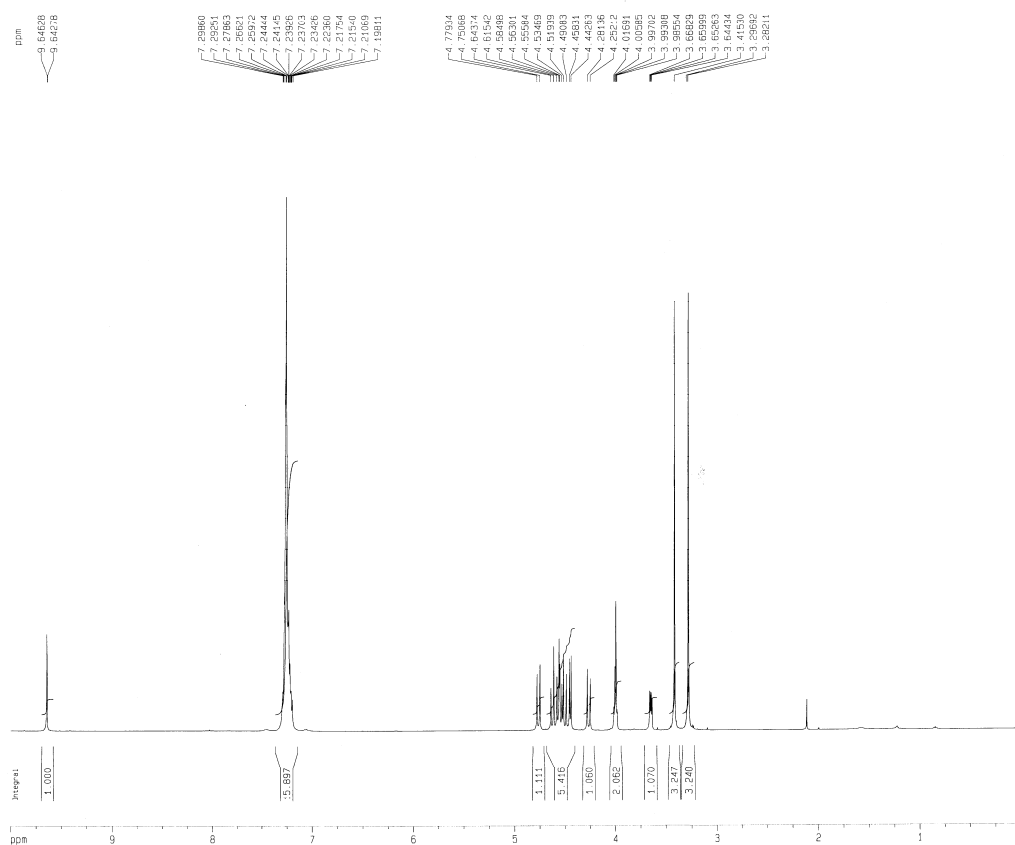

Current Data Parameters  
NAME Galacto  
EXPNO 7  
PROCNO 1

F2 - Acquisition Parameters  
Date\_ 20070302  
Time 16.22  
INSTRUM spect  
PROBHD 5 mm GNP 1H/13  
PULPROG zg30  
TD 32768  
SOLVENT CDCl3  
NS 32  
DS 0  
SWH 6793.478 Hz  
FIDRES 0.207320 Hz  
AQ 2.4117749 sec  
RG 64  
DK 73.600 usec  
DE 6.00 usec  
TE 300.2 K  
D1 1.00000000 sec  
MCREST 0.00000000 sec  
MCWRK 0.01500000 sec

===== CHANNEL f1 =====  
NUC1 1H  
P1 7.40 usec  
PL1 -6.00 dB  
SFO1 400.1326354 MHz

F2 - Processing parameters  
SI 16384  
SF 400.1300336 MHz  
WDW EM  
SSB 0  
LB 0.30 Hz  
GB 0  
PC 1.00

1D NMR plot parameters  
CX 32.00 cm  
CY 17.00 cm  
F1P 10.000 ppm  
F1 4001.30 Hz  
F2P 0.000 ppm  
F2 0.00 Hz  
PPHMC 0.31250 ppm/cm  
HZCM 125.04063 Hz/cm

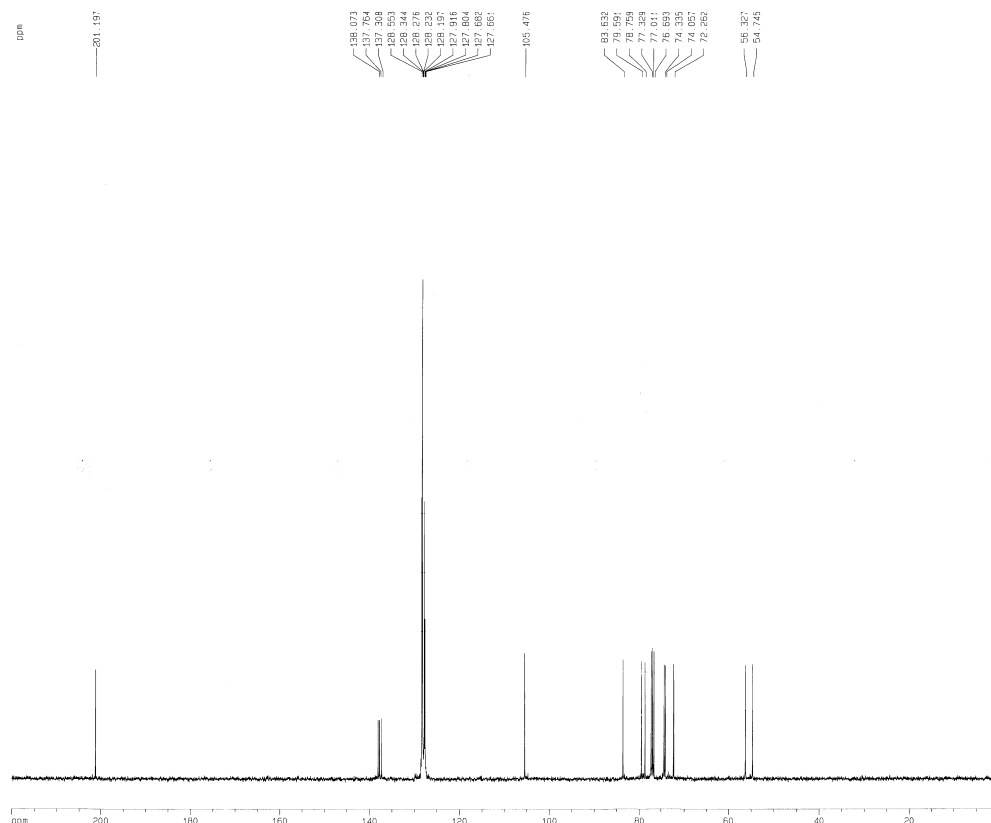

Current Data Parameters  
NAME Galacto  
EXPNO 7  
PROCNO 2

F2 - Acquisition Parameters  
Date\_ 20070221  
Time 17.00  
INSTRUM spect  
PROBHD 5 mm GNP 1H/13  
PULPROG zg30  
TD 32768  
SOLVENT CDCl3  
NS 16  
DS 0  
SWH 6793.478 Hz  
FIDRES 0.207320 Hz  
AQ 2.4117749 sec  
RG 67  
DK 73.600 usec  
DE 6.00 usec  
TE 300.2 K  
D1 1.00000000 sec  
MCREST 0.00000000 sec  
MCWRK 0.01500000 sec

===== CHANNEL f1 =====  
NUC1 1H  
P1 7.40 usec  
PL1 -6.00 dB  
SFO1 400.1326354 MHz

F2 - Processing parameters  
SI 100.6127813 MHz  
SF 100.6127813 MHz  
WDW EM  
SSB 0  
LB 2.00 Hz  
GB 0  
PC 1.40

1D NMR plot parameters  
CX 32.00 cm  
CY 16.00 cm  
F1P 220.000 ppm  
F1 22134.61 Hz  
F2P -0.000 ppm  
F2 -0.00 Hz  
PPHMC 6.87500 ppm/cm  
HZCM 691.71289 Hz/cm

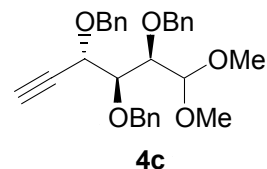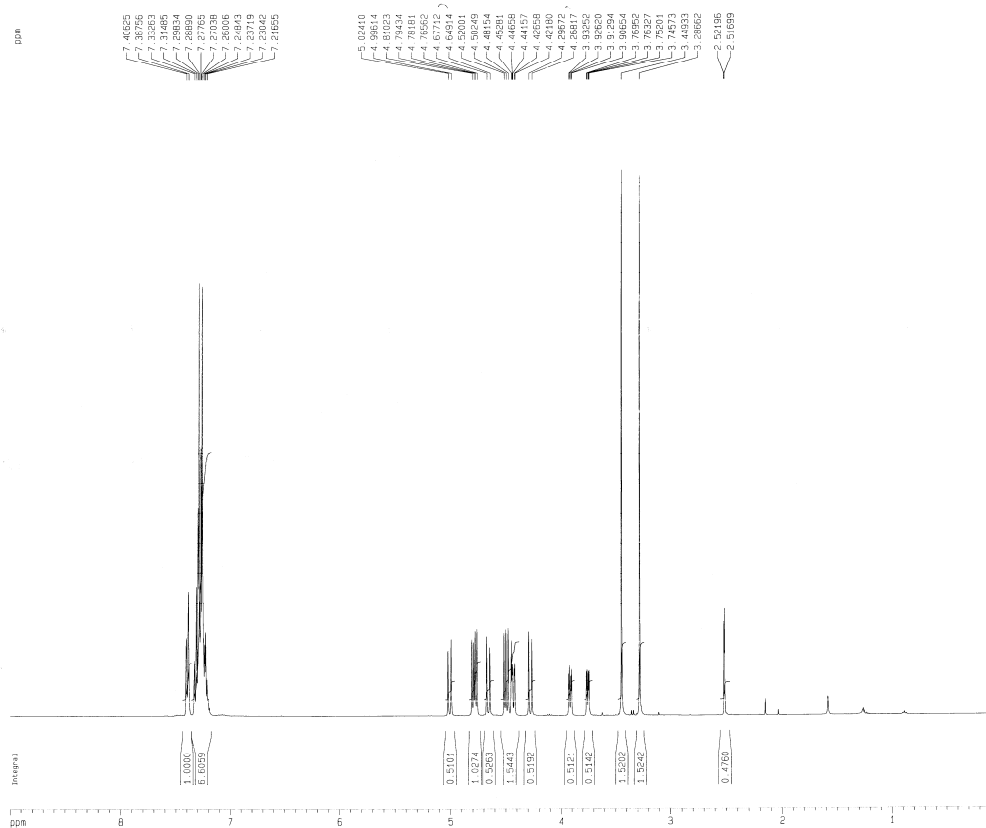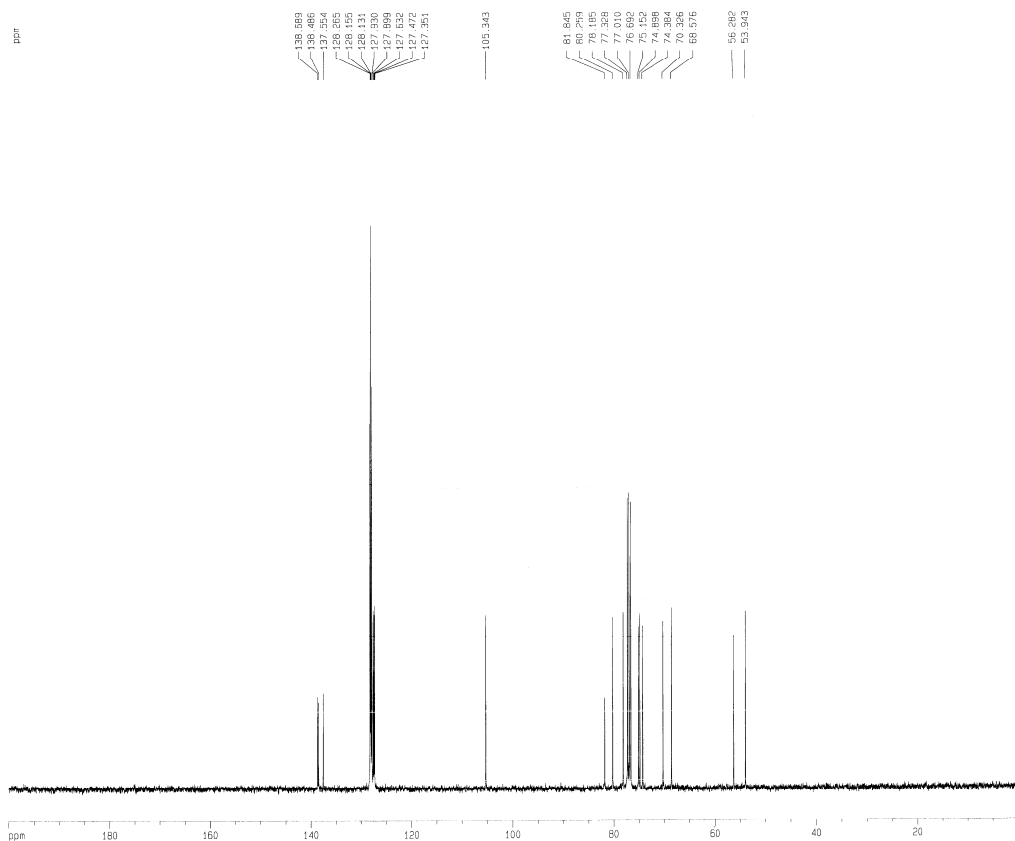

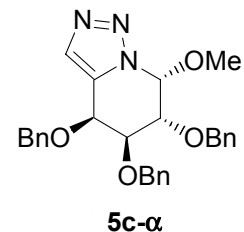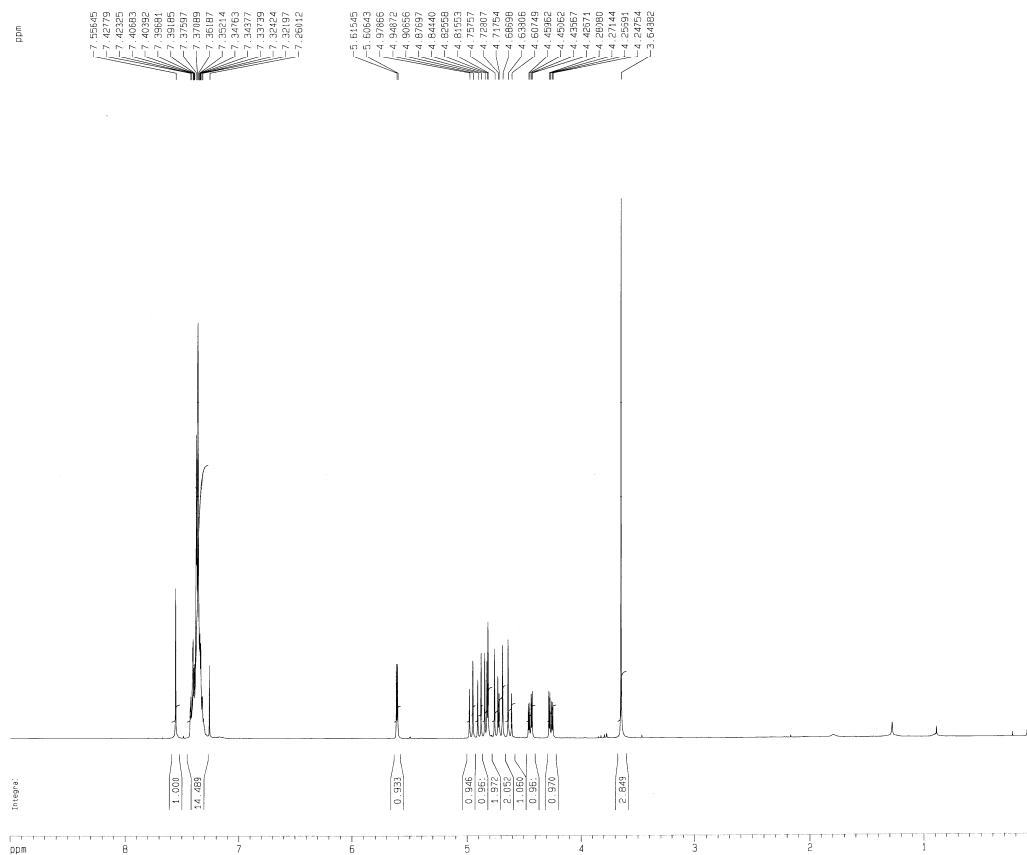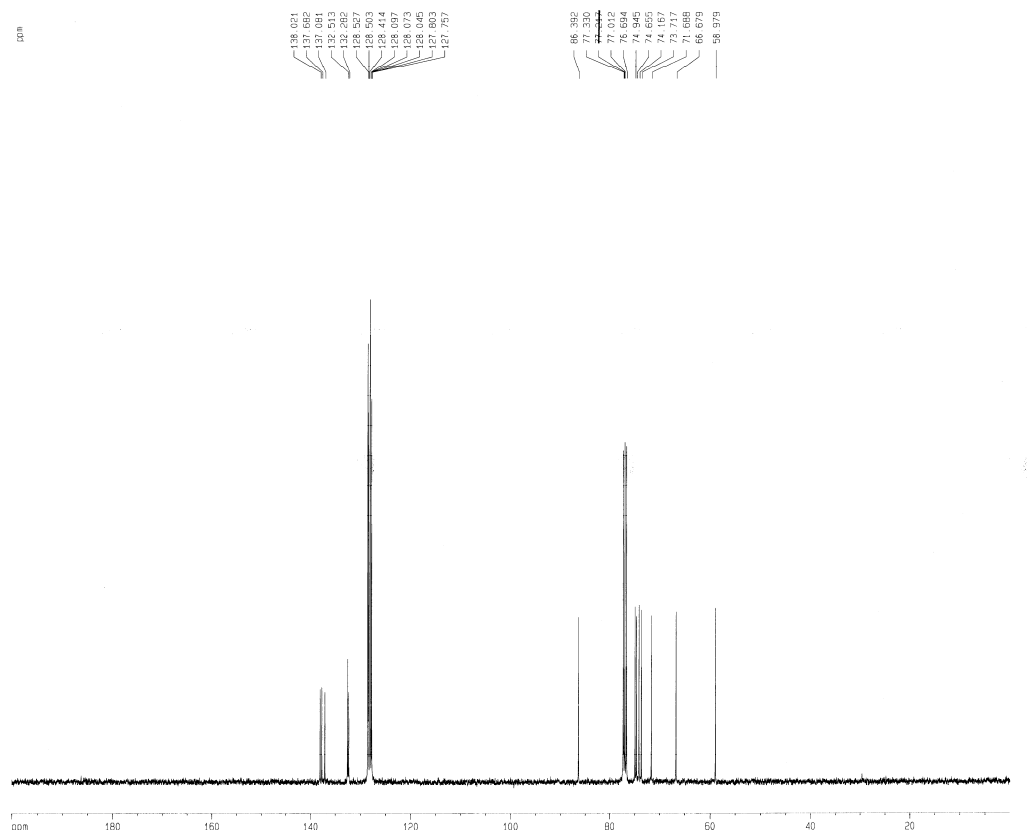

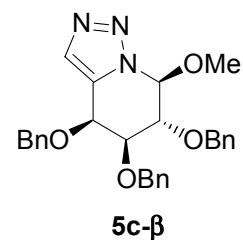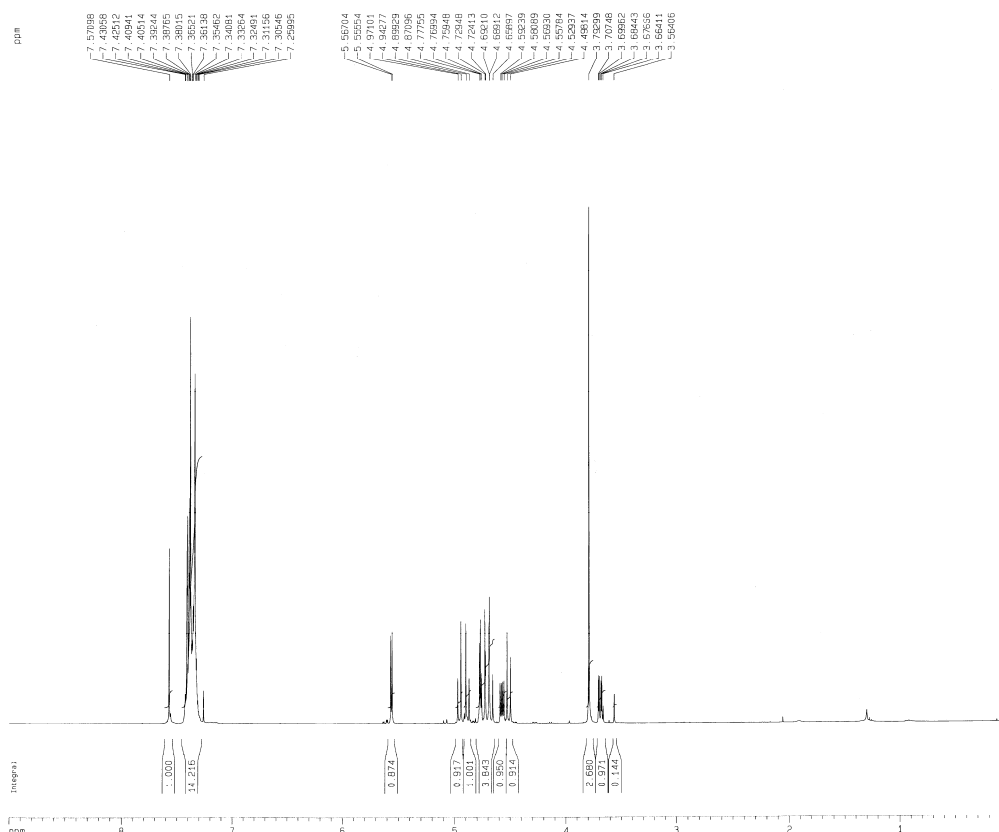

```

Current Data Parameters
NAME          Ga195
EXPNO        1
PROCNO       1

F2 - Acquisition Parameters
Date_        20070324
Time         13.35
INSTRUM      spect
PROBHD       5 mm QNP 1H/13
PULPROG      zg30
TD           32768
SOLVENT      CDCl3
NS           16
DS           0
SWH          6793.476 Hz
FIDRES      0.207320 Hz
AQ          2.4117249 sec
RG          40.3
DW          73.600 usec
DE          6.00 usec
TE          300.2 K
D1          1.0000000 sec
MCREST      0.0000000 sec
MCWK       0.0150000 sec

===== CHANNEL f1 =====
NUC1         1H
P1           7.40 usec
PL1         -6.00 dB
SFO1        400.1326394 MHz

F2 - Processing parameters
SI           65384
SF          400.1300991 MHz
WDW          EM
SSB          0
LB          0.30 Hz
GB          0
PC          1.00

1D NMR plot parameters
CX          32.00 cm
CY          17.00 cm
F1P        9.000 ppm
F1         3601.17 Hz
F2P        0.000 ppm
F2         0.00 Hz
PPMCM      0.28125 ppm/cm
HZCM       112.53656 Hz/cm
    
```

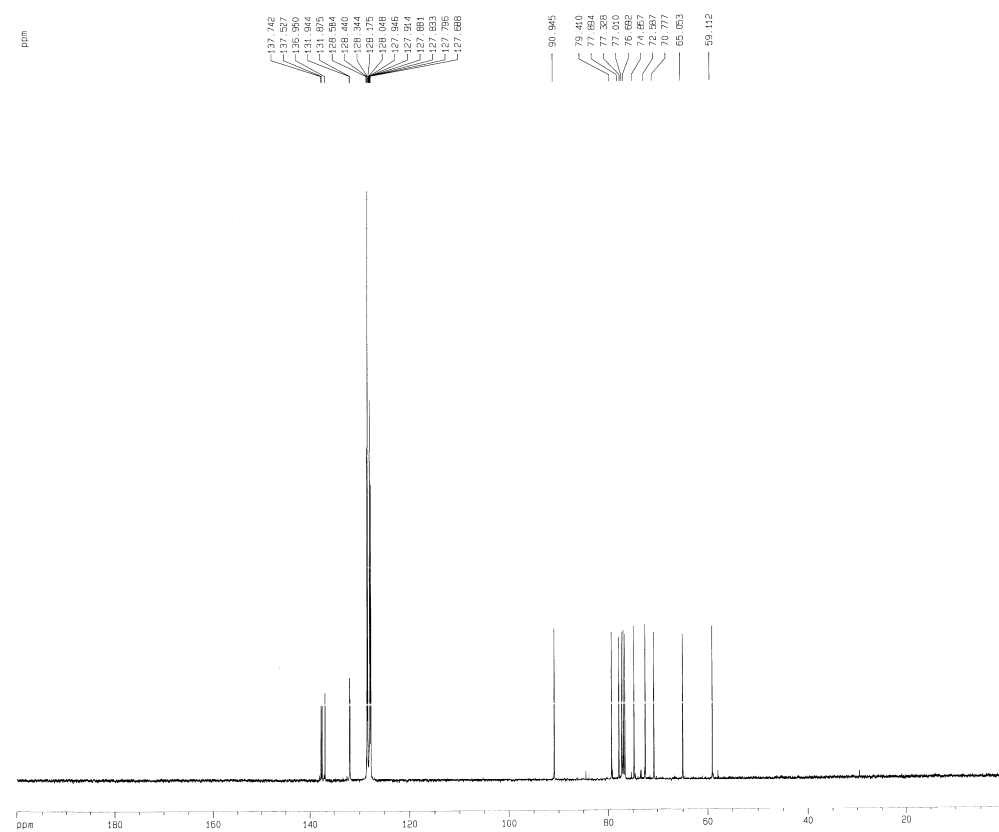

```

Current Data Parameters
NAME          Ga195
EXPNO        2
PROCNO       1

F2 - Acquisition Parameters
Date_        20070324
Time         23.43
INSTRUM      spect
PROBHD       5 mm QNP 1H/13
PULPROG      zgpg30
TD           65536
SOLVENT      CDCl3
NS           256
DS           2
SWH          26178.010 Hz
FIDRES      0.398445 Hz
AQ          1.2517875 sec
RG          4997.6
DW          19.100 usec
DE          6.00 usec
TE          300.2 K
D1          2.0000000 sec
d11         0.0300000 sec
DELTA       1.8995999 sec
MCREST      0.0000000 sec
MCWK       0.0150000 sec

===== CHANNEL f1 =====
NUC1         13C
P1           8.00 usec
PL1         -6.00 dB
SFO1        100.6238401 MHz

===== CHANNEL f2 =====
CPDPRG2     waltz16
NUC2         1H
PCPD2       100.00 usec
PL2         -6.00 dB
PL12        16.40 dB
PL13        16.40 dB
SFO2        400.1316076 MHz

F2 - Processing parameters
SI           32768
SF          100.6127861 MHz
WDW          EM
SSB          0
LB          2.00 Hz
GB          0
PC          1.40

1D NMR plot parameters
CX          32.00 cm
CY          19.00 cm
F1P        200.000 ppm
F1         20122.56 Hz
F2P        -0.000 ppm
F2         -0.00 Hz
PPMCM      5.25000 ppm/cm
HZCM       628.82990 Hz/cm
    
```

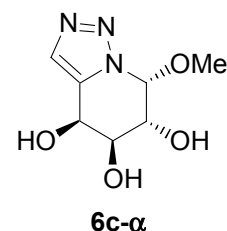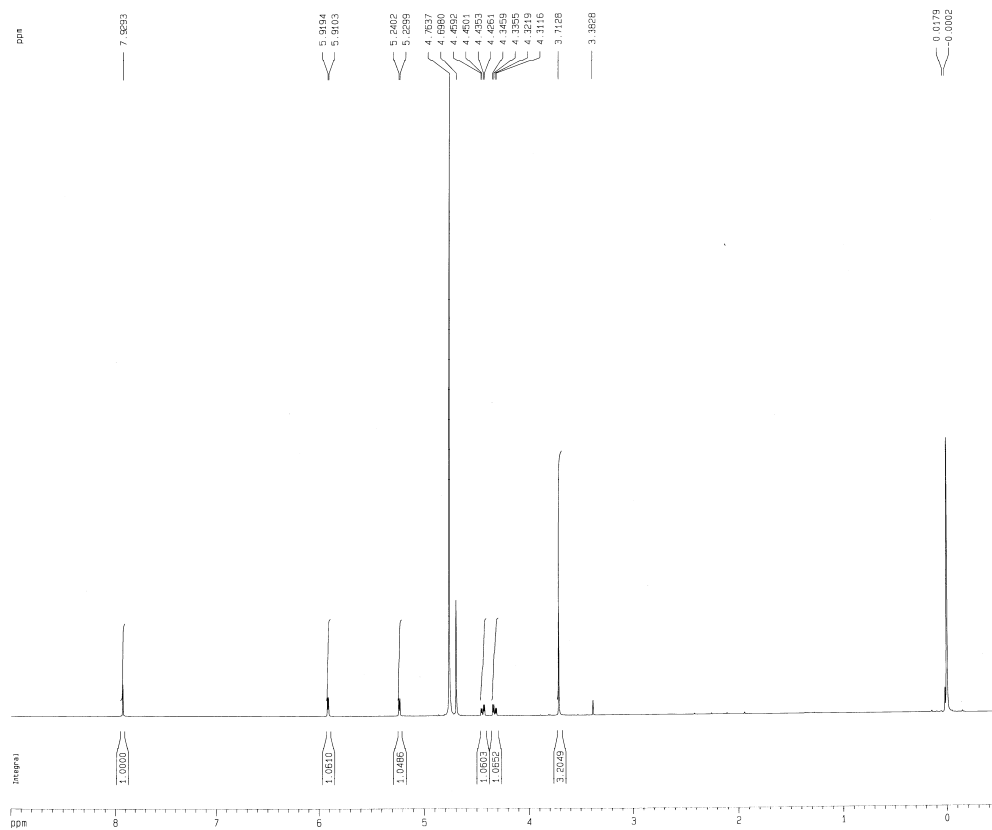

Current Data Parameters  
 NAME Gal-OH-less  
 EXPNO 1  
 PROCNO 1

F2 - Acquisition Parameters  
 Date\_ 20071102  
 Time 14.51  
 INSTRUM spect  
 PROBHD 5 mm QNP 1H/13  
 PULPROG zg30  
 TD 65536  
 SOLVENT CDCl3  
 NS 16  
 DS 2  
 SWH 8078.145 Hz  
 FIDRES 0.186314 Hz  
 AQ 3.9584243 sec  
 RG 90.5  
 DW 60.400 usec  
 DE 6.00 usec  
 TE 300.2 K  
 D1 1.00000000 sec  
 MCREST 0.00000000 sec  
 MCMK 0.01500000 sec

----- CHANNEL f1 -----  
 NUC1 1H  
 P1 11.50 usec  
 PL1 -4.00 dB  
 SFO1 400.0324703 MHz

F2 - Processing parameters  
 SI 32768  
 SF 400.0299726 MHz  
 WDW EM  
 SSB 0  
 LB 0.30 Hz  
 GB 0  
 PC 1.00

1D NMR plot parameters  
 CX 32.00 cm  
 CY 21.00 cm  
 F1P 9.000 ppm  
 F1 3600.27 Hz  
 F2P -0.500 ppm  
 F2 -200.01 Hz  
 PPMCM 0.2968 ppm/cm  
 HZCM 116.75890 Hz/cm

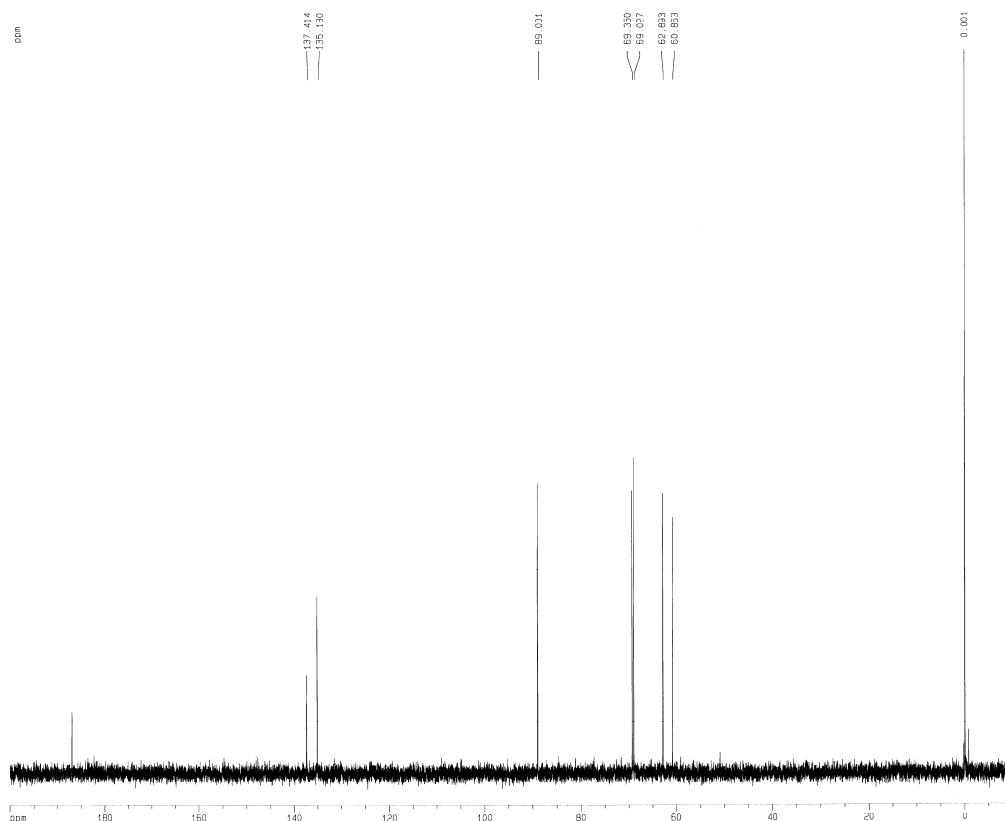

Current Data Parameters  
 NAME Gal-OH-less  
 EXPNO 1  
 PROCNO 1

F2 - Acquisition Parameters  
 Date\_ 20071102  
 Time 15.01  
 INSTRUM spect  
 PROBHD 5 mm QNP 1H/13  
 PULPROG zgpg30  
 TD 65536  
 SOLVENT CDCl3  
 NS 330  
 DS 4  
 SWH 26178.010 Hz  
 FIDRES 0.399445 Hz  
 AQ 1.2517075 sec  
 RG 3643.1  
 DM 19.100 usec  
 DE 6.00 usec  
 TE 300.2 K  
 D1 0.00000000 sec  
 D11 0.03000000 sec  
 DELTA 1.89999998 sec  
 MCREST 0.00000000 sec  
 MCMK 0.01500000 sec

----- CHANNEL f1 -----  
 NUC1 13C  
 P1 10.00 usec  
 PL1 -3.50 dB  
 SFO1 100.6261800 MHz

----- CHANNEL f2 -----  
 NUC2 1H  
 P1P1P 100.00 usec  
 PL2 -4.00 dB  
 PL12 17.00 dB  
 PL13 17.00 dB  
 SFO2 400.0316001 MHz

F2 - Processing parameters  
 SI 32768  
 SF 100.6274293 MHz  
 WDW EM  
 SSB 0  
 LB 1.00 Hz  
 GB 0  
 PC 1.40

1D NMR plot parameters  
 CX 32.00 cm  
 CY 10.00 cm  
 F1P 200.000 ppm  
 F1 20117.48 Hz  
 F2P -10.000 ppm  
 F2 -1005.87 Hz  
 PPMCM 6.56250 ppm/cm  
 HZCM 660.10492 Hz/cm



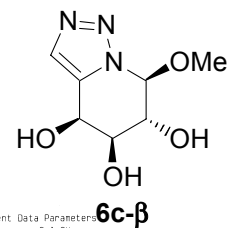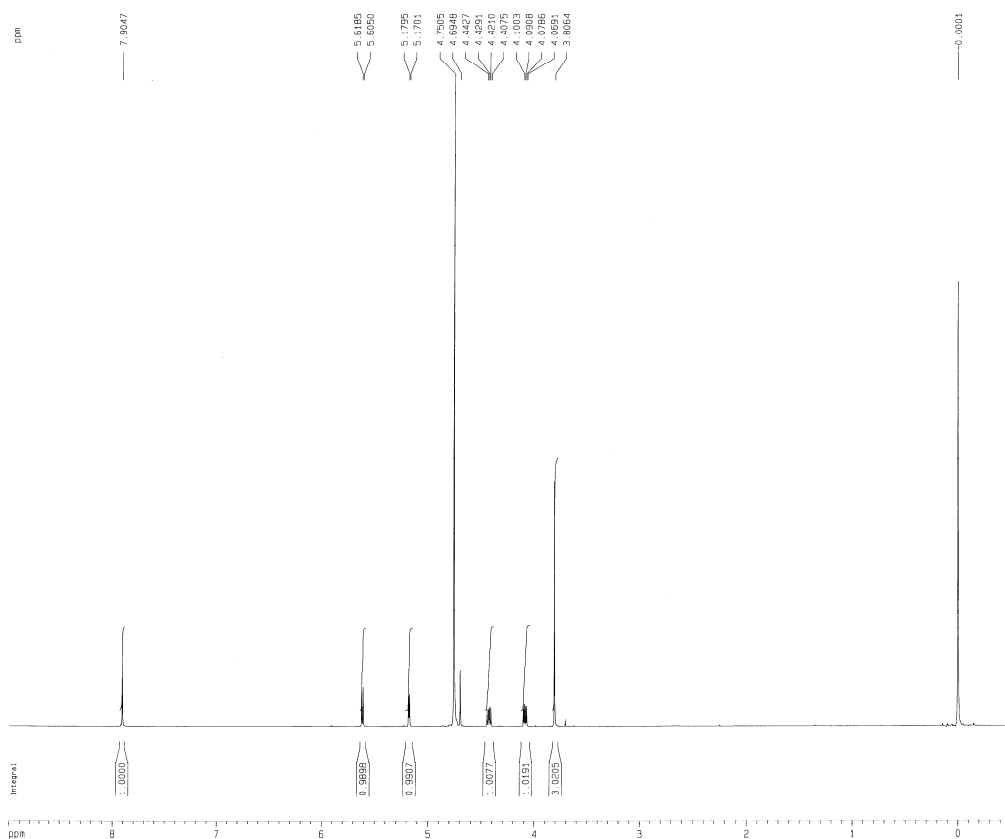

Current Data Parameters  
 NAME Gal-DH-more  
 EXPNO 1  
 PROCNO 1

F2 - Acquisition Parameters  
 Date\_ 20071031  
 Time 16.57  
 INSTRUM spect  
 PROBHD 5 mm QNP 1H/13  
 PULPROG zg30  
 TO 65336  
 SOLVENT CDCl3  
 NS 16  
 DS 2  
 SWH 8278.146 Hz  
 FIDRES 0.126314 Hz  
 AQ 3.9584243 sec  
 RG 65  
 DW 60.400 usec  
 DE 6.00 usec  
 TE 300.2 K  
 D1 1.00000000 sec  
 MCREST 0.00000000 sec  
 MCWRR 0.01500000 sec

----- CHANNEL f1 -----  
 NUC1 1H  
 P1 11.50 usec  
 PL1 -4.00 dB  
 SFO1 400.0324703 MHz

F2 - Processing parameters  
 SI 32768  
 SF 400.0299769 MHz  
 MDW EM  
 SSB 0  
 LB 0.30 Hz  
 GB 0  
 PC 1.00

1D NMR plot parameters  
 CX 32.00 cm  
 CY 21.00 cm  
 F1P 9.000 ppm  
 F1 3600.27 Hz  
 F2P -0.500 ppm  
 F2 -200.01 Hz  
 FWHM 0.29688 ppm/cm  
 HZCM 118.75889 Hz/cm

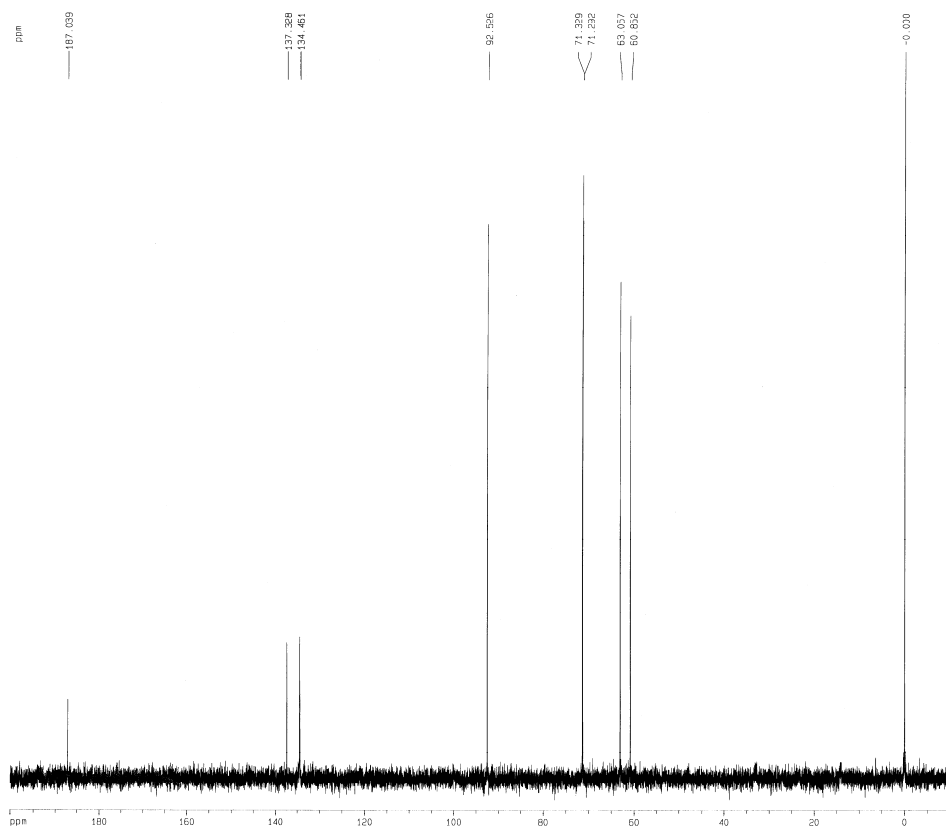

Current Data Parameters  
 NAME Gal-DH-more  
 EXPNO 2  
 PROCNO 1

F2 - Acquisition Parameters  
 Date\_ 20071031  
 Time 17.07  
 INSTRUM spect  
 PROBHD 5 mm QNP 1H/13  
 PULPROG zgpg30  
 TO 65336  
 SOLVENT CDCl3  
 NS 279  
 DS 4  
 SWH 26178.010 Hz  
 FIDRES 0.399445 Hz  
 AQ 1.2517875 sec  
 RG 8192  
 DW 19.100 usec  
 DE 6.00 usec  
 TE 300.2 K  
 D1 2.00000000 sec  
 d11 0.03000000 sec  
 DELTA 1.89999998 sec  
 MCREST 0.00000000 sec  
 MCWRR 0.01500000 sec

----- CHANNEL f1 -----  
 NUC1 13C  
 P1 10.00 usec  
 PL1 -3.50 dB  
 SFO1 100.5986886 MHz

----- CHANNEL f2 -----  
 CPDPRG2 waltz16  
 NUC2 1H  
 PCPD2 100.00 usec  
 PL2 -4.00 dB  
 PL12 17.00 dB  
 PL13 17.00 dB  
 SFO2 400.0316001 MHz

F2 - Processing parameters  
 SI 32768  
 SF 100.5874203 MHz  
 MDW EM  
 SSB 0  
 LB 1.00 Hz  
 GB 0  
 PC 1.40

1D NMR plot parameters  
 CX 30.00 cm  
 CY 19.00 cm  
 F1P 200.000 ppm  
 F1 20117.48 Hz  
 F2P -10.000 ppm  
 F2 -1005.87 Hz  
 FWHM 7.50000 ppm/cm  
 HZCM 704.11188 Hz/cm

9. <sup>1</sup>H and <sup>13</sup>C NMR spectra of **7c**, **8c** and **9c**

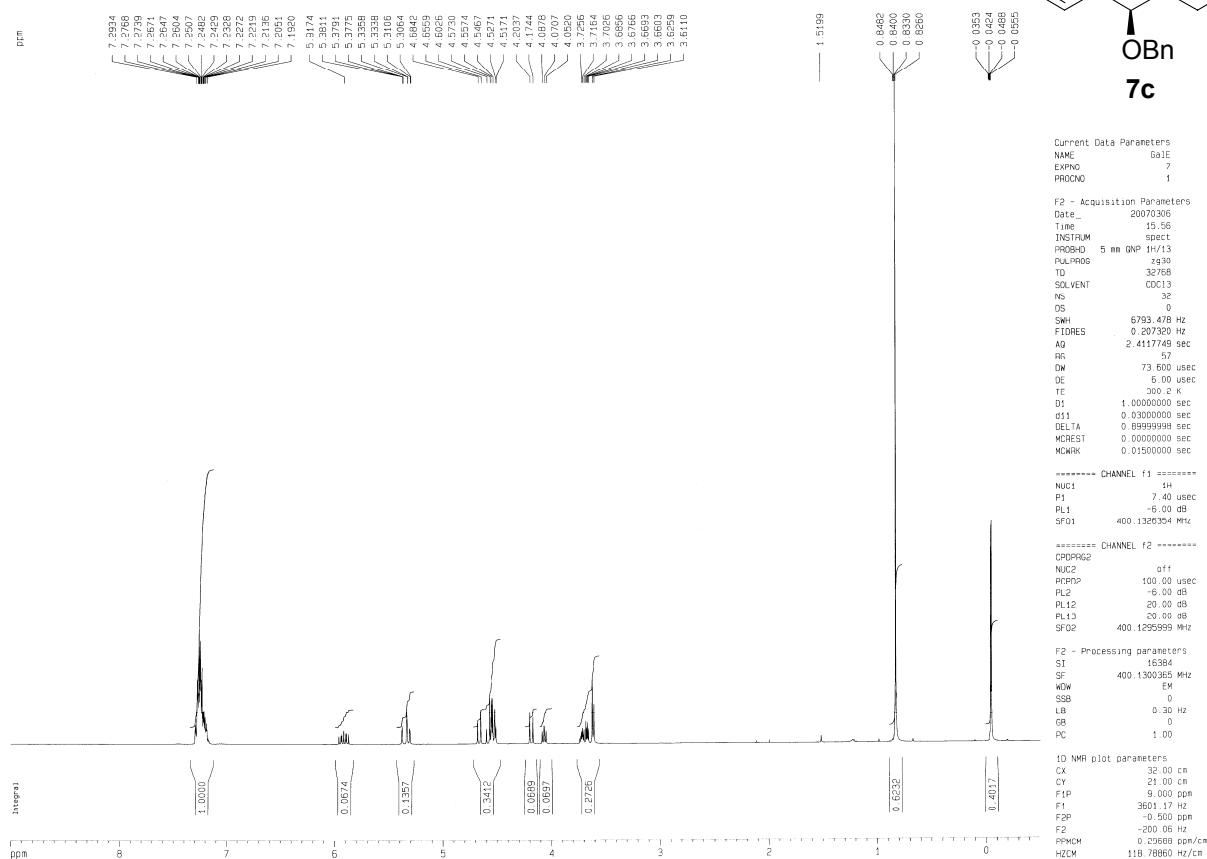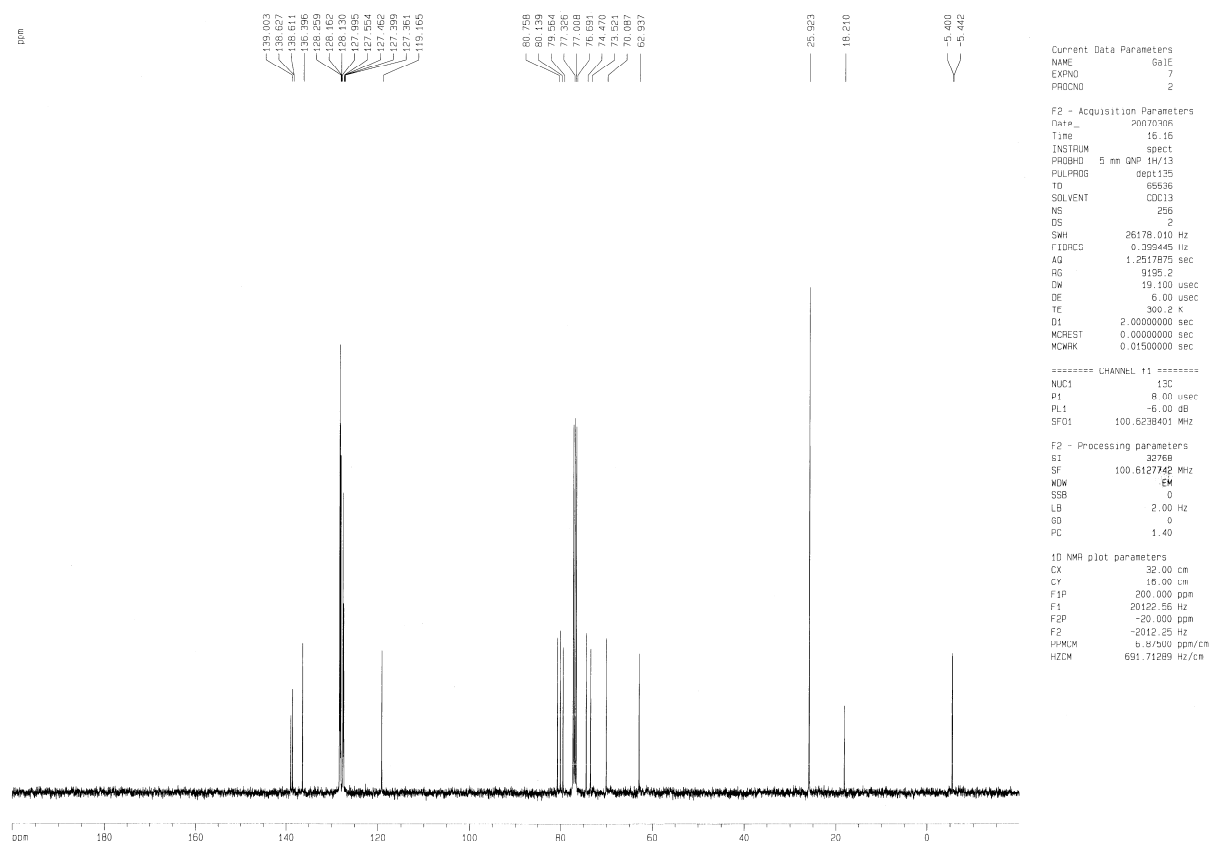

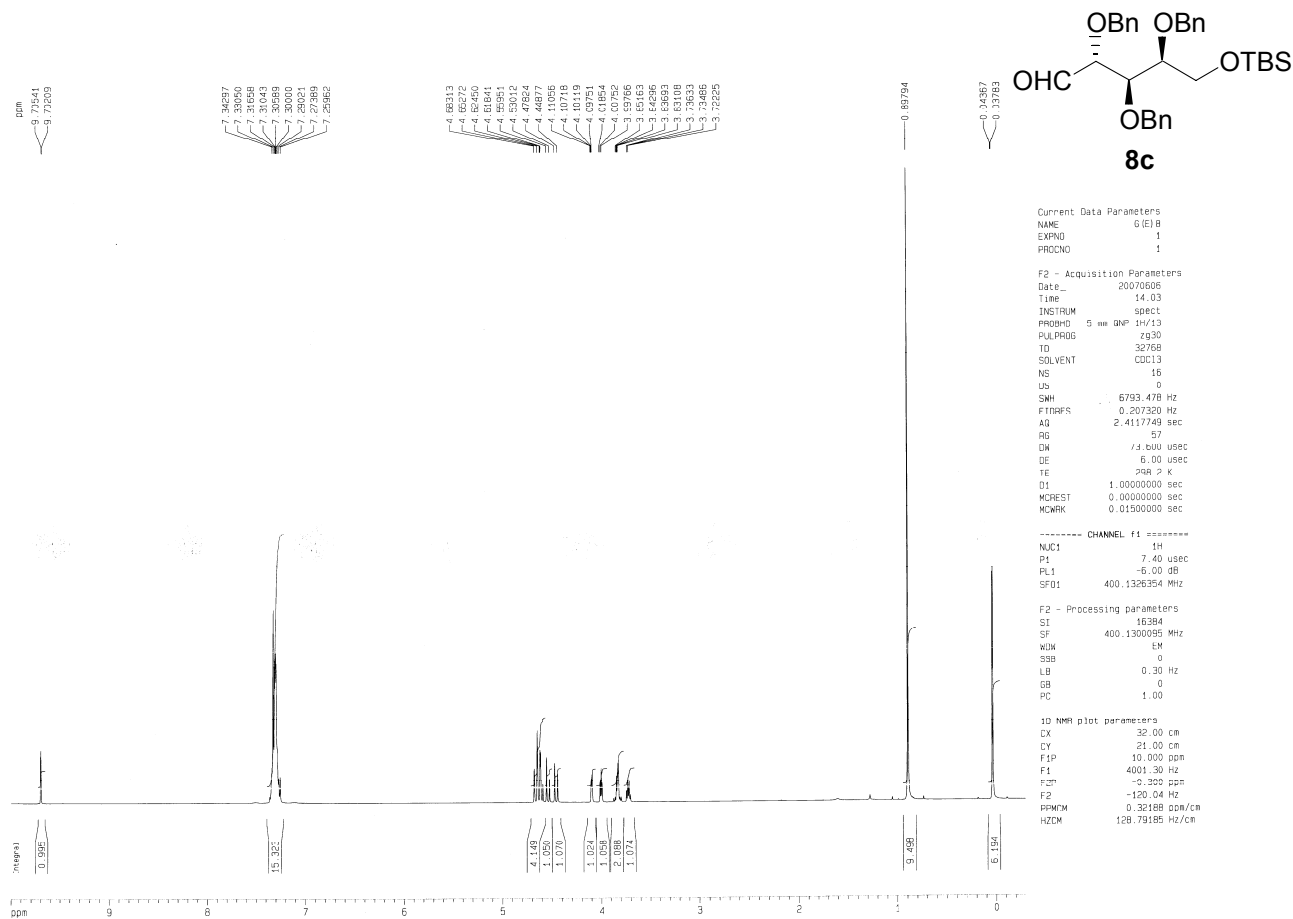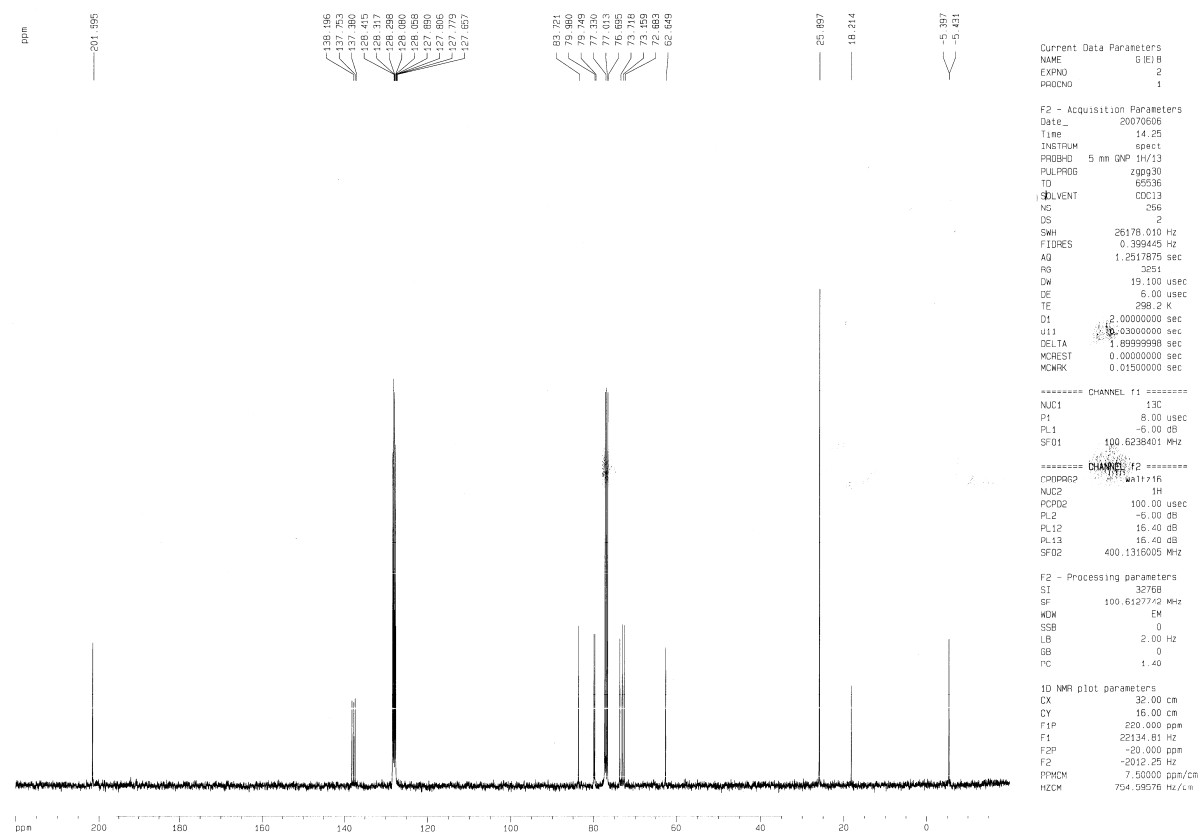

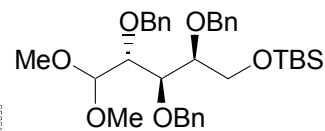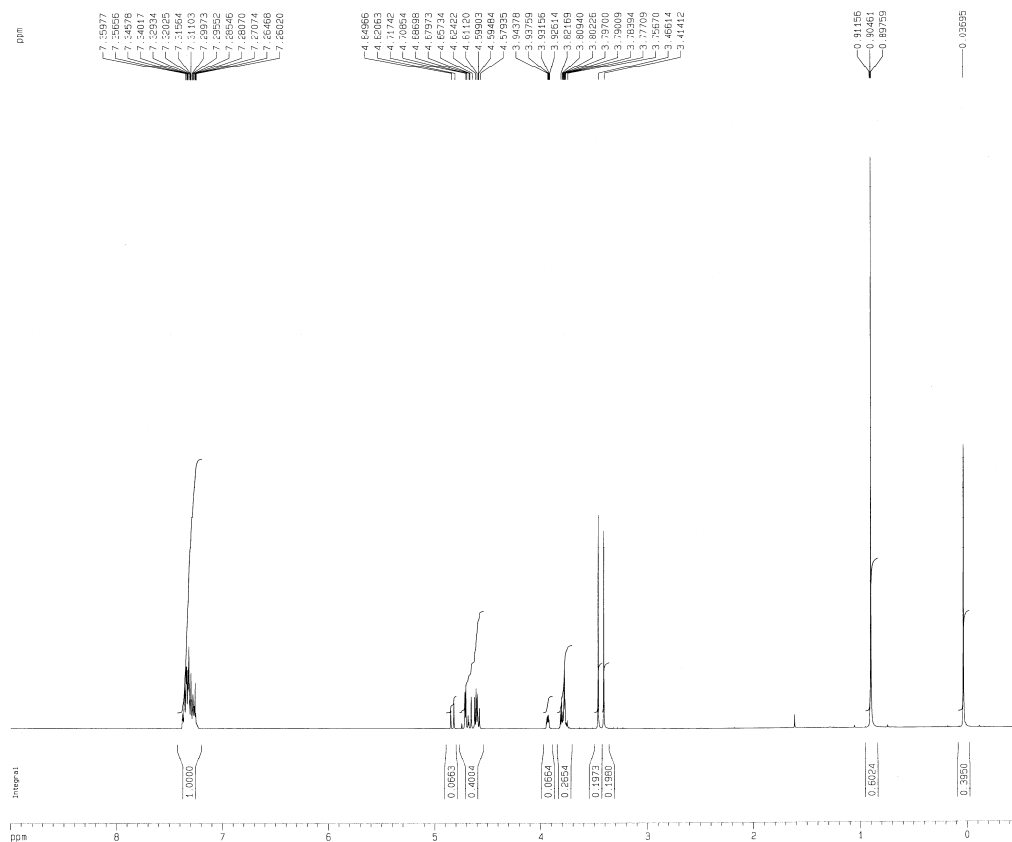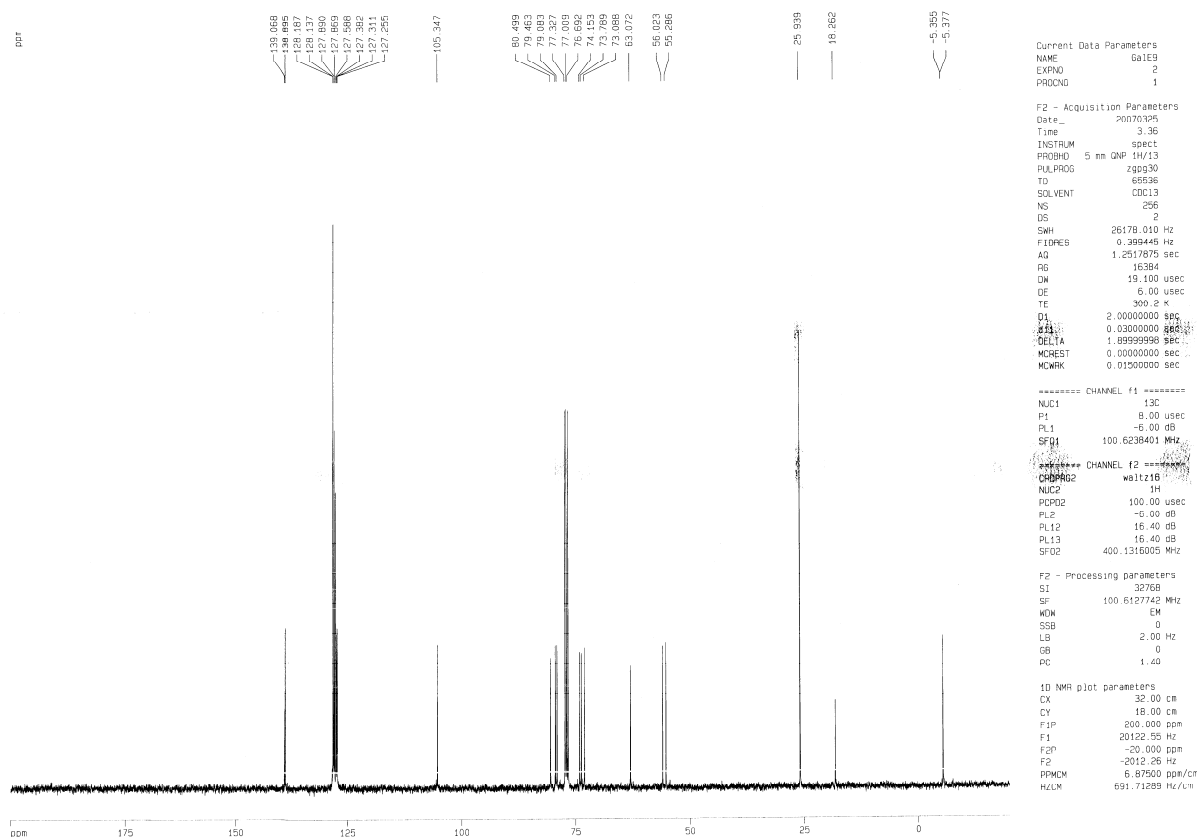

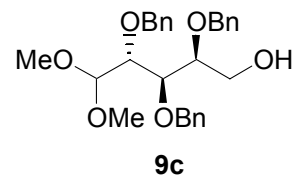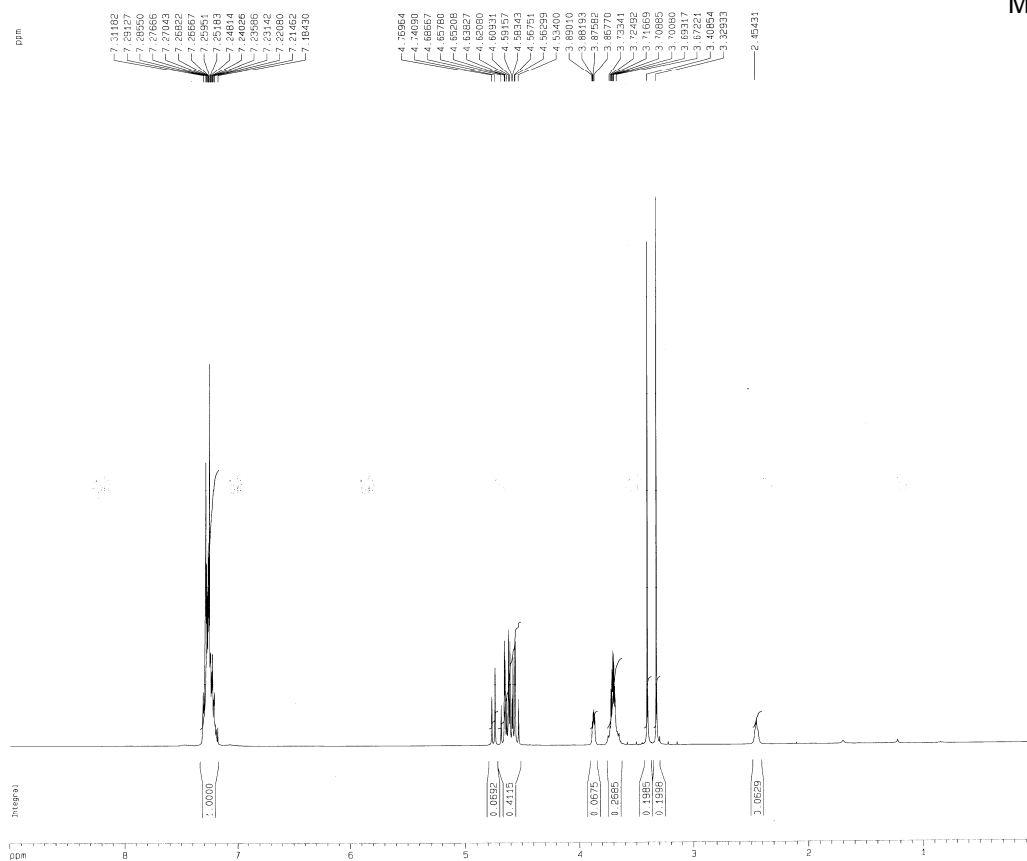

```

Current Data Parameters
NAME          GaIE
EXPNO        10
PROCNO       1

F2 - Acquisition Parameters
Date_        20070323
Time         1.39
INSTRUM      spect
PROBHD       5 mm QNP 1H/13
PULPROG      zg30
TD           32768
SOLVENT      CDCl3
NS           16
DS           0
SMH          6793.478 Hz
FIDRES       0.237300 Hz
AQ           2.417749 sec
RG           64
DW           73.600 usec
DE           6.00 usec
TE           300.2 K
D1           1.00000000 sec
d11          0.03000000 sec
DELTA        0.09899999 sec
MCREST       0.00000000 sec
MCWRK        0.01500000 sec

===== CHANNEL f1 =====
NUC1         1H
P1           7.40 usec
PL1         -6.00 dB
SFO1        400.1363654 MHz

===== CHANNEL f2 =====
UNPRG2
NUC2         off
PCPD2       100.00 usec
PL2         -6.00 dB
PL12        20.30 dB
PL13        20.00 dB
SFO2        400.1259999 MHz

F2 - Processing parameters
SI           16384
SF           400.1300394 MHz
WDW          EM
SSB          0
LB           0.30 Hz
GB           0
PC           1.00

1D NMR plot parameters
CX           32.00 cm
CY           17.00 cm
F1P          6.000 ppm
F1           3601.17 Hz
F2P          0.000 ppm
F2           0.00 Hz
RPMCM        0.2912 ppm/cm
HZCM         112.53658 Hz/cm
    
```

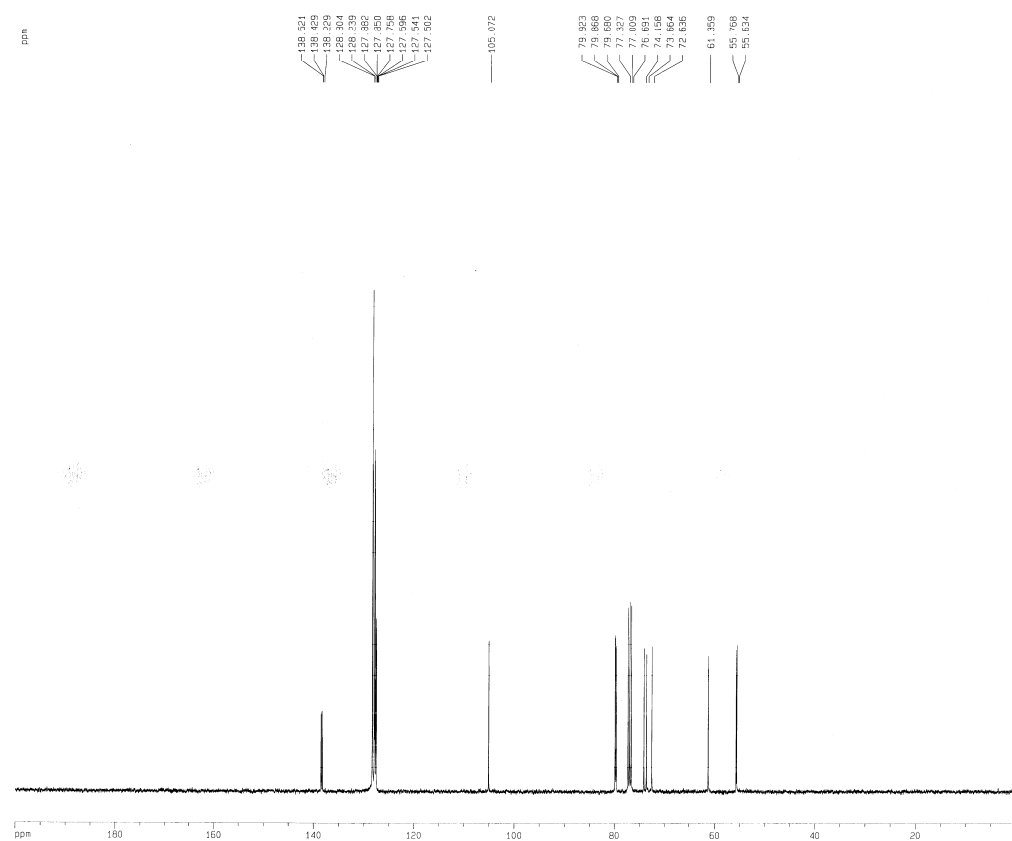

```

Current Data Parameters
NAME          GaIE
EXPNO        10
PROCNO       2

F2 - Acquisition Parameters
Date_        20070323
Time         2.13
INSTRUM      spect
PROBHD       5 mm QNP 1H/13
PULPROG      dept135
TD           65536
SOLVENT      CDCl3
NS           256
DS           2
SMH          26178.010 Hz
FIDRES       0.399445 Hz
AQ           1.2517875 sec
RG           16384
DW           19.100 usec
DE           6.00 usec
TE           300.2 K
CNST2       145.0000000 sec
d2           2.00000000 sec
d21          0.00344828 sec
d12          0.00002000 sec
DELTA        0.0001919 sec
MCREST       0.00000000 sec
MCWRK        0.01500000 sec

===== CHANNEL f1 =====
NUC1         13C
P1           8.00 usec
P2          16.00 usec
PL1         -6.00 dB
SFO1        100.6238401 MHz

===== CHANNEL f2 =====
UNPRG2
wait2       1H
NUC2         1H
P3           10.30 usec
P4           20.60 usec
PCPD2       100.00 usec
PL2         -6.00 dB
PL12        16.40 dB
SFO2        400.1316005 MHz

F2 - Processing parameters
SI           32768
SF           100.6127805 MHz
WDW          EM
SSB          0
LB           2.00 Hz
GB           0
PC           1.40

1D NMR plot parameters
CX           32.00 cm
CY           16.00 cm
F1P          200.600 ppm
F1           20122.55 Hz
F2P          -0.000 ppm
F2           -0.00 Hz
RPMCM        6.25000 ppm/cm
HZCM         628.82950 Hz/cm
    
```

10. <sup>1</sup>H and <sup>13</sup>C NMR spectra of **7b**, **8b** and **9b**

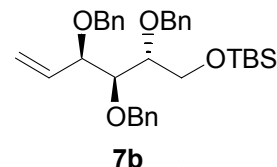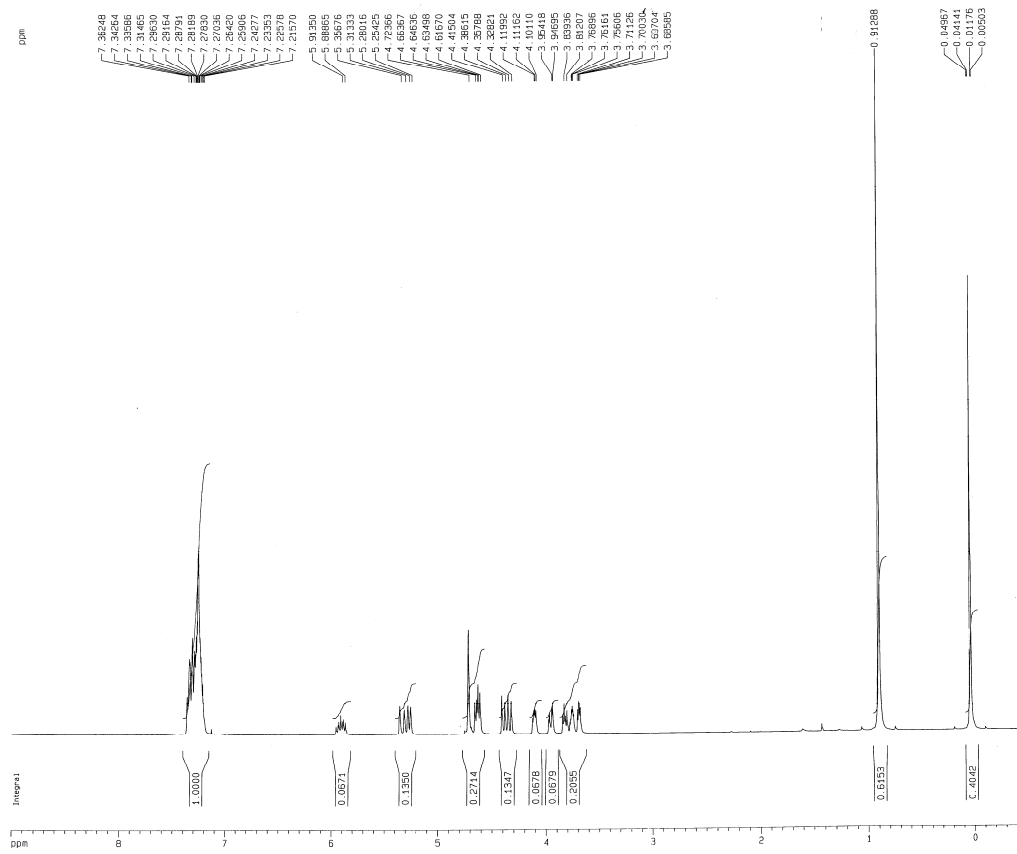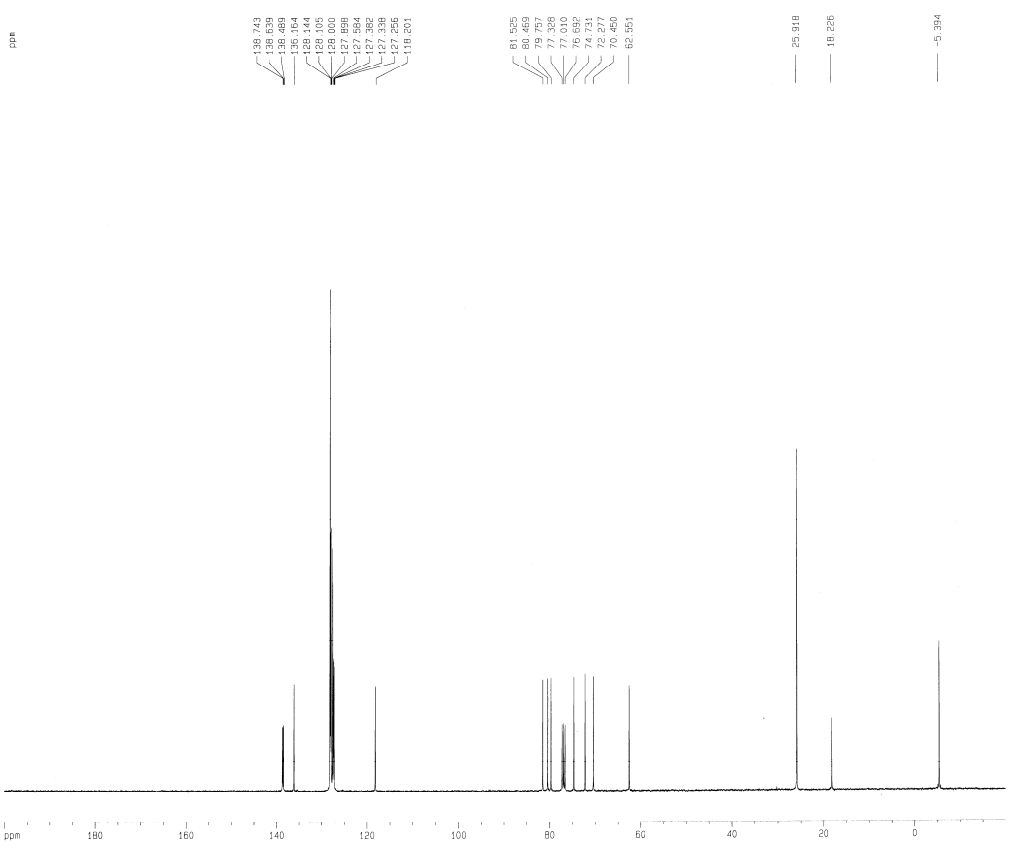

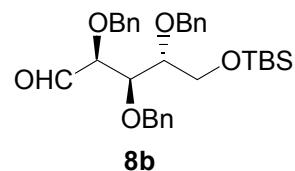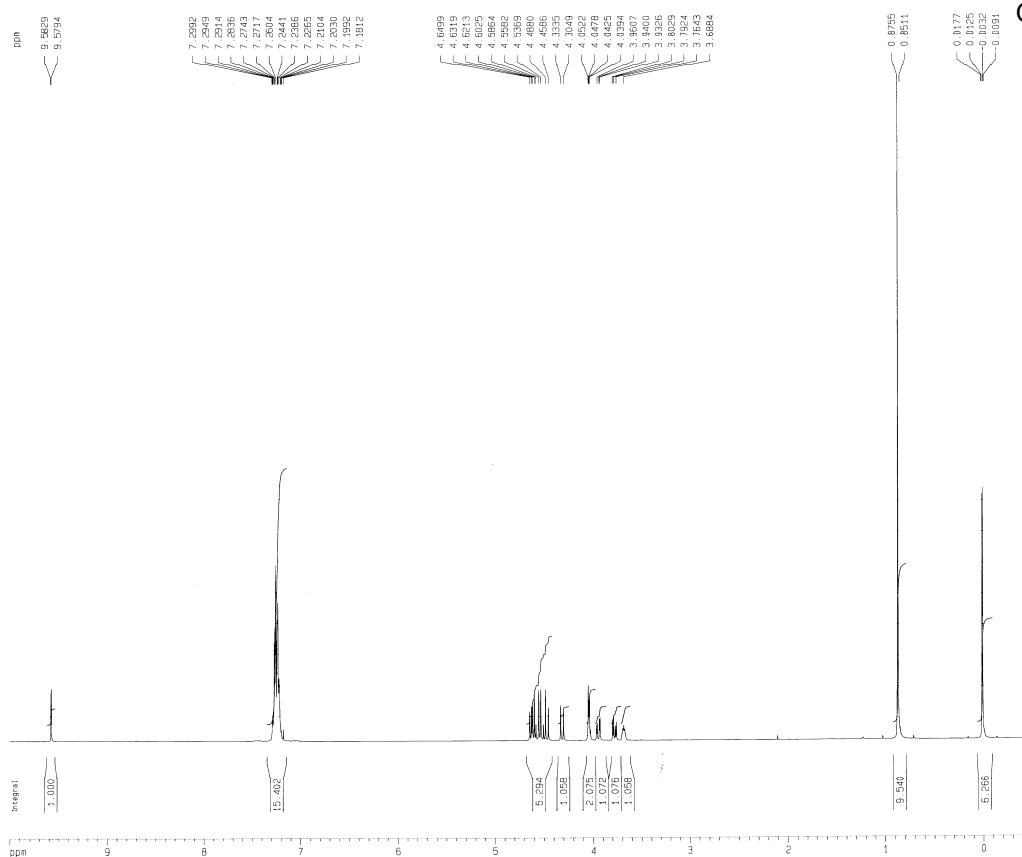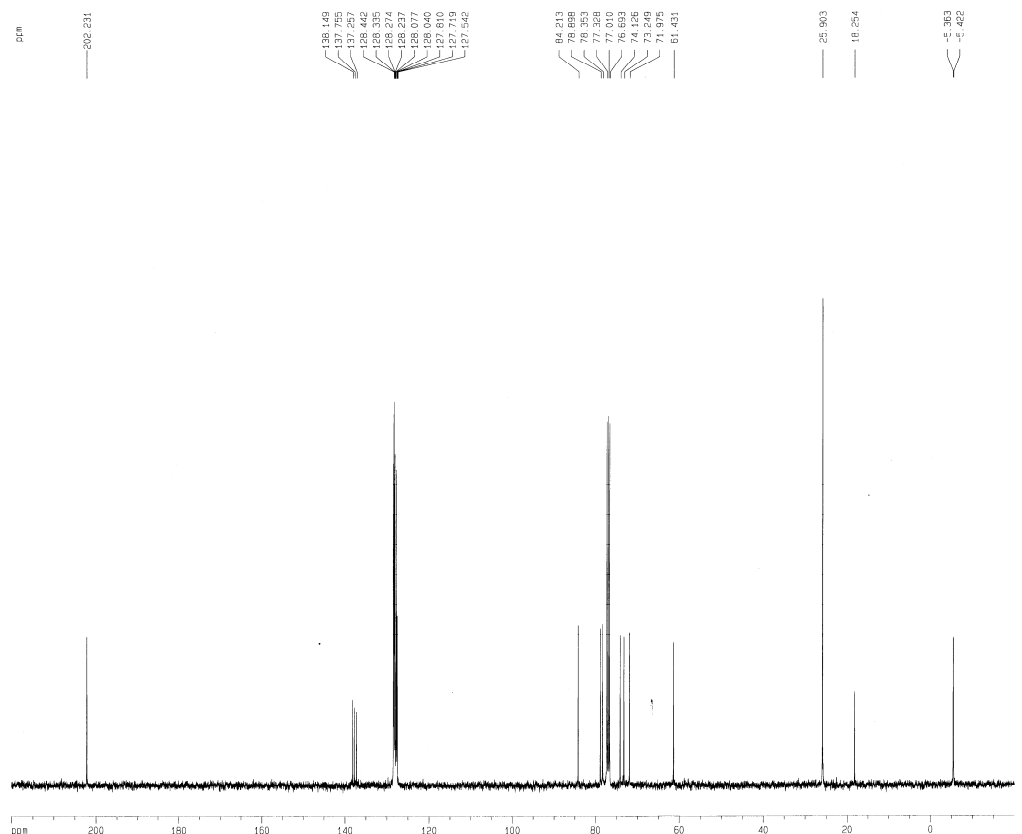

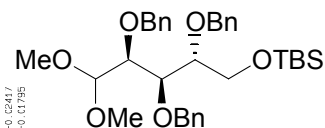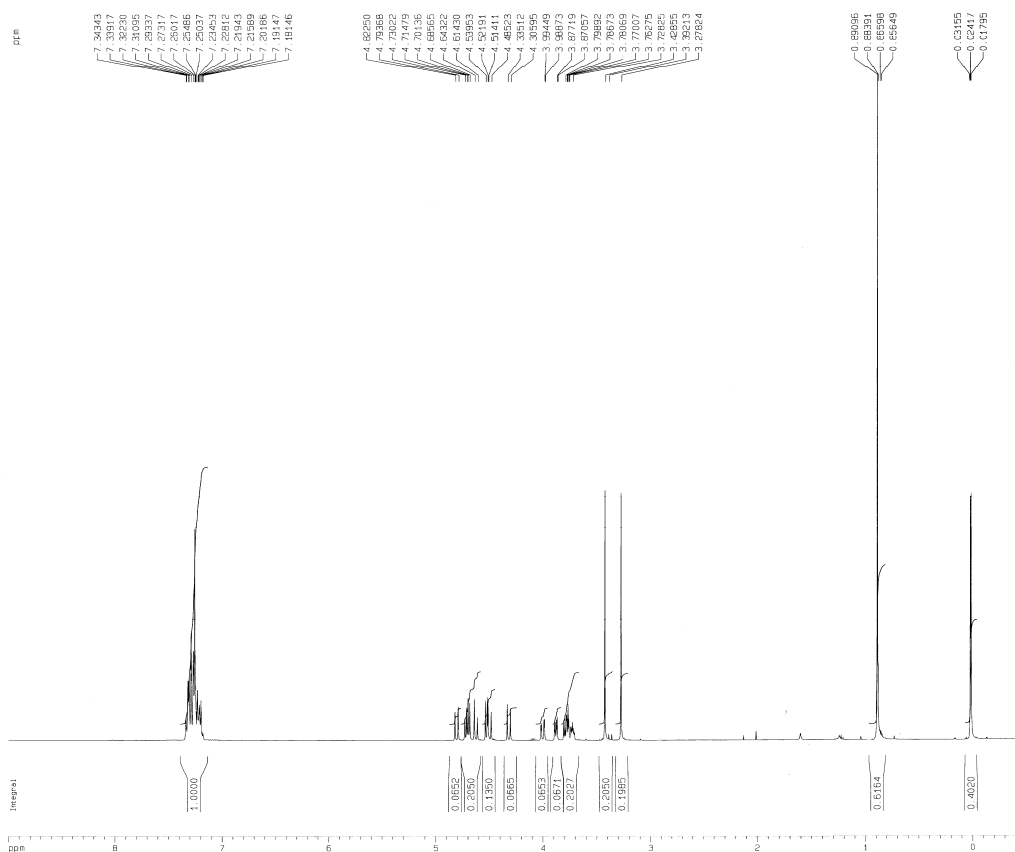

Current Data Parameters  
NAME Manno  
EXPNO 9  
PROCNO 2

F2 - Acquisition Parameters  
Date\_ 00070203  
Time 16.20  
INSTRUM spect  
PROBHD 5 mm QNP 1H/13  
PULPROG zg30  
TO 32768  
SOLVENT CDCl3  
NS 32  
DS 0  
SWH 6793.478 Hz  
FIDRES 0.207320 Hz  
AQ 2.4117749 sec  
RG 57  
DW 73.600 usec  
DE 6.00 usec  
TE 300.2 K  
D1 1.00000000 sec  
MCREST 0.00000000 sec  
MCWRK 0.01500000 sec

===== CHANNEL f1 =====  
NUC1 1H  
P1 7.40 usec  
PL1 -6.00 dB  
SFO1 400.1326354 MHz

F2 - Processing parameters  
SI 16384  
SF 400.1300323 MHz  
WDW EM  
SSB 0  
LB 0.30 Hz  
GB 0  
PC 1.00

1D NMR plot parameters  
CX 32.00 cm  
CY 21.00 cm  
FIP 9.000 ppm  
F1 3601.7 Hz  
F2 -200.06 Hz  
F3 -200.06 Hz  
PRMCM 0.29668 ppm/cm  
HZCM 118.78860 Hz/cm

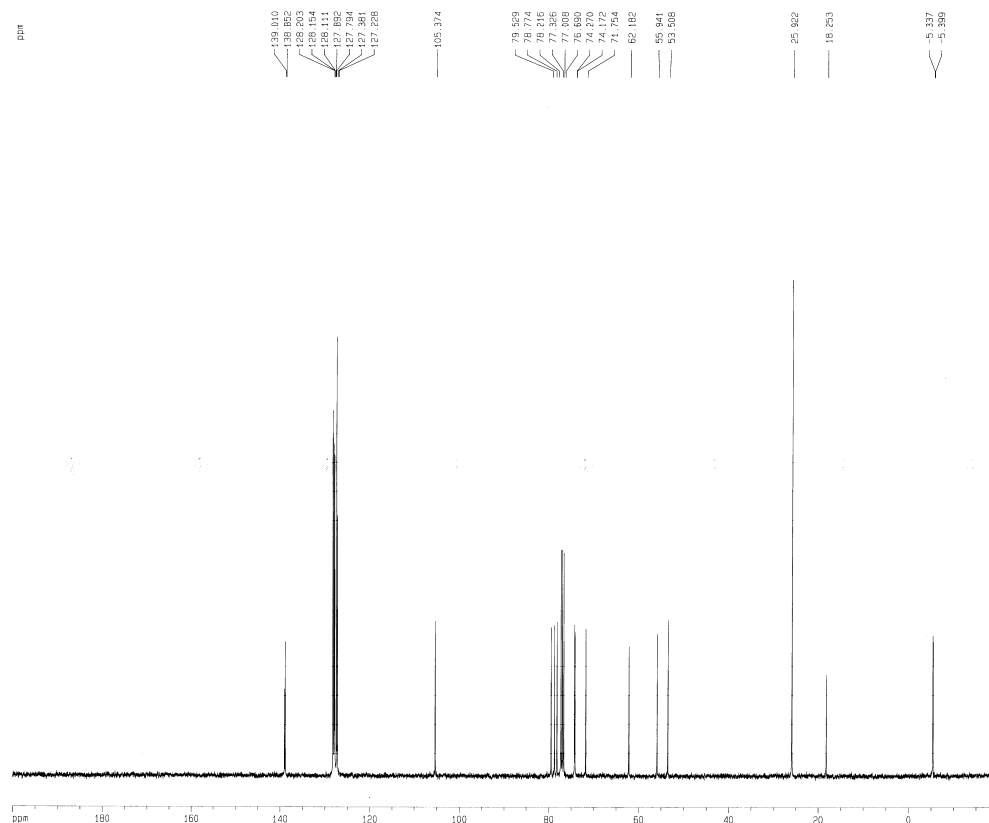

Current Data Parameters  
NAME Manno  
EXPNO 9  
PROCNO 1

F2 - Acquisition Parameters  
Date\_ 20070221  
Time 17.21  
INSTRUM spect  
PROBHD 5 mm QNP 1H/13  
PULPROG zgpg30  
TO 85536  
SOLVENT CDCl3  
NS 256  
DS 2  
SWH 26178.010 Hz  
FIDRES 0.399445 Hz  
AQ 1.2517075 sec  
RG 5160.6  
DW 19.100 usec  
DE 6.00 usec  
TE 300.2 K  
D1 2.00000000 sec  
d11 0.03000000 sec  
DELTA 1.09999998 sec  
MCREST 0.00000000 sec  
MCWRK 0.01500000 sec

===== CHANNEL f1 =====  
NUC1 13C  
P1 8.00 usec  
PL1 -6.00 dB  
SFO1 100.6238401 MHz

===== CHANNEL f2 =====  
CPDPRG2 waltz16  
NUC2 1H  
PCPD2 100.00 usec  
PL2 -6.00 dB  
PL3 16.40 dB  
PL13 16.40 dB  
SFO2 400.1316005 MHz

F2 - Processing parameters  
SI 32768  
SF 100.6127781 MHz  
WDW DM  
SSB 0  
LB 2.00 Hz  
GB 0  
PC 1.40

1D NMR plot parameters  
CX 32.00 cm  
CY 16.00 cm  
FIP 200.000 ppm  
F1 20122.56 Hz  
F2 -20.000 ppm  
F3 -2012.25 Hz  
PRMCM 6.87500 ppm/cm  
HZCM 691.71289 Hz/cm



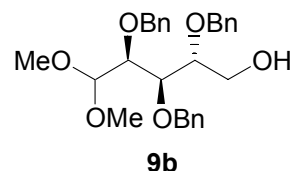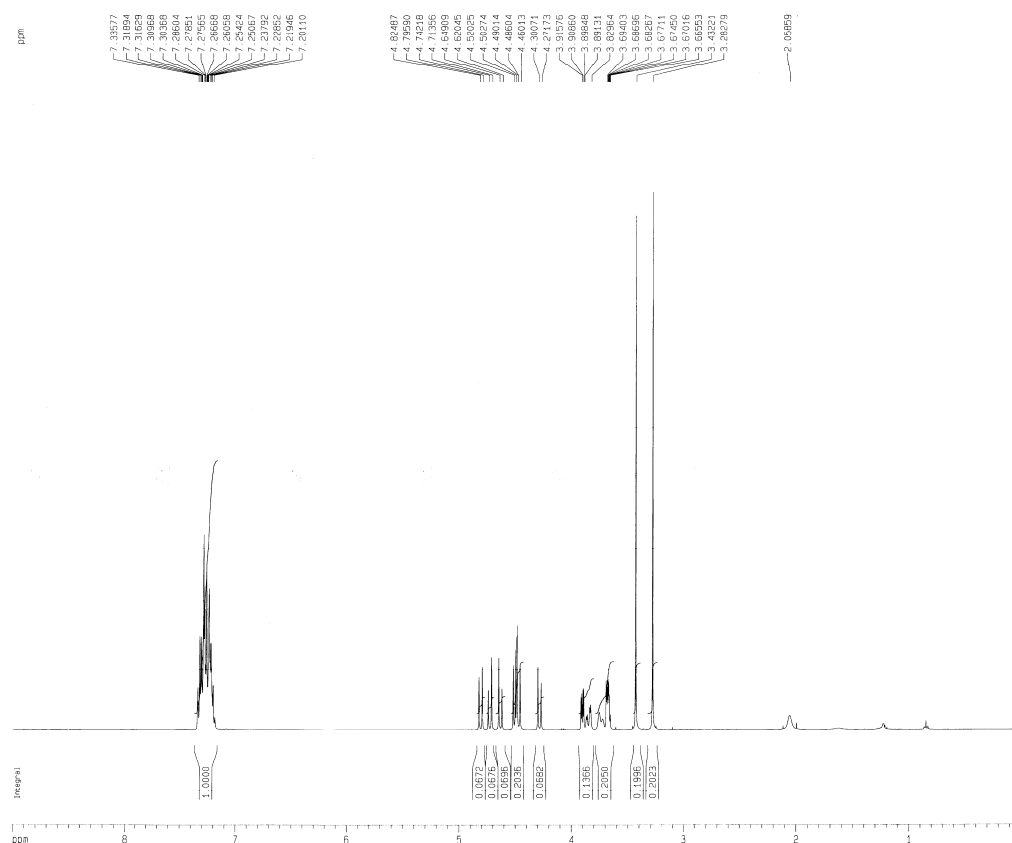

Current Data Parameters  
NAME Manno  
EXPNO 10  
PROCNO 1

F2 - Acquisition Parameters  
Date\_ 20070303  
Time 15:26  
INSTRUM spect  
PROBHD 5 mm QNP 1H/13  
PULPROG zg30  
TD 32768  
SOLVENT CDCl3  
NS 32  
DS 0  
SWH 6793.478 Hz  
FIDRES 0.207320 Hz  
AQ 2.4117749 sec  
RG 57  
DW 73.600 usec  
DE 6.00 usec  
TE 300.2 K  
D1 1.00000000 sec  
MCREST 0.00000000 sec  
MCWK 0.01500000 sec

==== CHANNEL f1 =====  
NUC1 1H  
P1 7.40 usec  
PL1 -6.00 dB  
SFO1 400.1362614 MHz

F2 - Processing parameters  
SI 16384  
SF 400.1300332 MHz  
WDW EM  
SSB 0  
LB 0.30 Hz  
GB 0  
PC 1.00

1D NMR plot parameters  
CX 32.00 cm  
CY 17.00 cm  
FID 9.300 ppm  
F1 3601.17 Hz  
F2 0.000 ppm  
F2 0.00 Hz  
PRMCM 0.28125 ppm/cm  
HZCM 112.53658 Hz/cm

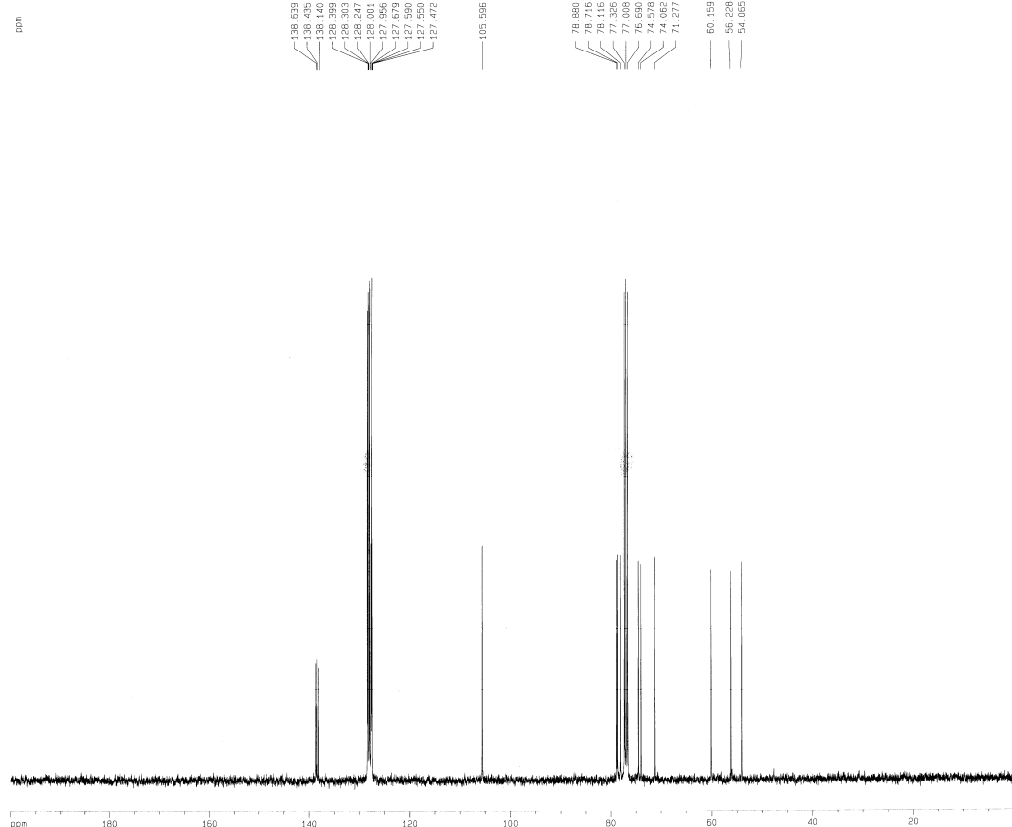

Current Data Parameters  
NAME Manno  
EXPNO 10  
PROCNO 2

F2 - Acquisition Parameters  
Date\_ 20070302  
Time 17:19  
INSTRUM spect  
PROBHD 5 mm QNP 1H/13  
PULPROG zg30  
TD 32768  
SOLVENT CDCl3  
NS 32  
DS 0  
SWH 6793.478 Hz  
FIDRES 0.207320 Hz  
AQ 2.4117749 sec  
RG 57  
DW 73.600 usec  
DE 6.00 usec  
TE 300.2 K  
D1 1.00000000 sec  
MCREST 0.00000000 sec  
MCWK 0.01500000 sec

==== CHANNEL f1 =====  
NUC1 1H  
P1 7.40 usec  
PL1 -6.00 dB  
SFO1 400.1326354 MHz

F2 - Processing parameters  
SI 32768  
SF 100.6127758 MHz  
WDW EM  
SSB 0  
LB 2.00 Hz  
GB 0  
PC 1.40

1D NMR plot parameters  
CX 32.00 cm  
CY 16.00 cm  
FID 200.000 ppm  
F1 20122.55 Hz  
F2 -0.000 ppm  
F2 -0.00 Hz  
PRMCM 6.29500 ppm/cm  
HZCM 528.82390 Hz/cm

## References

1. M. Kleban, U. Kautz, J. Greul, P. Hilgers, R. Kugler, H.-Q. Dong, V. Jaeger, *Synthesis* 2000, 1027-1033.
2. P. R. Skaanderup, L. Hyldtoft, R. Madsen, *Monatsh. Chem.* 2002, **133**, 467-472.
3. J. Désiré, J. Prandi, *Eur. J. Org. Chem.* 2000, 3075-3084.
